# Supplementary material
Source: publisher figshare collection journal article supplement (https://acs.figshare.com/ndownloader/files/27443485)
Supplement: Supplementary file 1 [file 27443485]

## Sheet: summary
Header line description of table 1
Total spectrums	Number of spectrums produced by mass spectrometer
Matched spetrums	Number of spectrums matched with alignment protein
Peptides	Number of peptides whitch spetrums hit
Modified peptides	Total number of modified peptides identified
Identified modified proteins	Number of proteins detected by spetrum search analysis
Quantifiable modified proteins	Number of proteins quantifiable
Identified modification sites	Number of modification sites detected by spetrum search analysis
Quantifiable modification sites	Number of modification sites quantifiable
Header line description of worksheet "Quant"
Protein accession	Protein accession number of database used for search
Position	Modification site localization in protein
Amino acid	The amino acid that modification site modified
Protein description	Protein functional description
Gene name	Indicates the name of the gene that code for the protein sequence
Localization probability	Probability of a certain amino acid containing this modification in this peptide
PEP	The maximal posterior error probability for peptides, which is the probability of each peptide to be a false hit considering identification score and peptide length
Score	A simple rule to be used to judge whether a result is significant or not
Modified sequence	Identified peptide sequence marked with modification sites localization probabilities
Charge	Carried charge of peptide
Mass error [ppm]	Parts per million ratio of peptide mass error between the theory and practice
MS/MS Count	Number of spectrum matched with peptide
Header line description of worksheet "pep_quant"
ID	Identified peptide index number
Sequence	Identified peptide amino acid sequence
Length	Identified peptide amino acid length
Modifications	identified peptide with modification markers
Modified sequence	Identified peptide sequence marked with modification sites localization probabilities
Protein accession	Protein accession number of database used for search
Protein description	Protein functional description
Charge	Carried charge of peptide
m/z	Mass-to-charge ratio of peptide
Mass error [ppm]	Parts per million ratio of peptide mass error between the theory and practice
PEP	The maximal posterior error probability for peptides, which is the probability of each peptide to be a false hit considering identification score and peptide length
Score	A simple rule to be used to judge whether a result is significant or not
MS/MS Count	Number of spectrum matched with peptide

## Sheet: phospho quant
Phosphorylation identified information					Phosphorylation quant Treat/control			Protein quant Treat/control			Normalized phosphorylation quant Treat/control					Motif		Functional annotation
Protein accession	Position	Amino acid	Protein description	Gene name	Exp.1	Exp.2	Exp.3	Exp.1	Exp.2	Exp.3	Exp.1	Exp.2	Exp.3	Average	P value	Motif Logo	Motif sequence	Subcellular Location	Biological Process	Cellular Component	Molecular Function	KEGG KO No.	KEGG Gene	KEGG Pathway	InterPro ID	InterPro Domain	CORUM Complex
A0AVK6	71	S	Transcription factor E2F8	E2F8												......SP....R	MLISAVSPEIRNR	nucl	chordate embryonic development; embryonic placenta development; positive regulation of biosynthetic process; cell cycle comprising mitosis without cytokinesis; regulation of DNA-dependent DNA replication; cellular metabolic process; regulation of cell cycle process; metabolic process; angiogenesis; chorionic trophoblast cell differentiation; macromolecule metabolic process; negative regulation of…	cell part; intracellular; macromolecular complex; intracellular part; transcription factor complex; protein complex; cell;	organic cyclic compound binding; regulatory region DNA binding; heterocyclic compound binding; DNA binding; transcription corepressor activity; regulatory region nucleic acid binding; binding; transcription regulatory region DNA binding; nucleic acid binding transcription factor activity; nucleic acid binding; transcription factor binding transcription factor activity; transcription cofactor acti…	K09391			IPR011991; IPR003316;	Transcription factor E2F/dimerisation partner (TDP); Winged helix-turn-helix DNA-binding domain;
A0FGR8	691	S	Extended synaptotagmin-2	ESYT2	2.035	2.051	1.985	1.167	1.156	1.197	1.74379	1.77422	1.65831	1.72544	0.00206631		SIKSHMSGSPGPG	nucl		membrane; cell part; cell periphery; membrane part; intrinsic to membrane; cell; integral to membrane; plasma membrane;					IPR000008;	C2 domain;
A0FGR8	693	S	Extended synaptotagmin-2	ESYT2	1.336		1.354	1.167	1.156	1.197	1.14482		1.13116	1.13799		......SP.....	KSHMSGSPGPGGS	nucl		membrane; cell part; cell periphery; membrane part; intrinsic to membrane; cell; integral to membrane; plasma membrane;					IPR000008;	C2 domain;
A0FGR8	738	S	Extended synaptotagmin-2	ESYT2	0.898	0.998	1.006	1.167	1.156	1.197	0.769494	0.863322	0.840434	0.824417	0.0447915	...RS.S......	DLGRSSSSLLASP	nucl		membrane; cell part; cell periphery; membrane part; intrinsic to membrane; cell; integral to membrane; plasma membrane;					IPR000008;	C2 domain;
A0FGR8	739	S	Extended synaptotagmin-2	ESYT2		2.105		1.167	1.156	1.197		1.82093		1.82093		......SL.....	LGRSSSSLLASPG	nucl		membrane; cell part; cell periphery; membrane part; intrinsic to membrane; cell; integral to membrane; plasma membrane;					IPR000008;	C2 domain;
A0FGR8	743	S	Extended synaptotagmin-2	ESYT2	1.228	1.334	1.274	1.167	1.156	1.197	1.05227	1.15398	1.06433	1.09019	0.138103	......SP.....	SSSLLASPGHISV	nucl		membrane; cell part; cell periphery; membrane part; intrinsic to membrane; cell; integral to membrane; plasma membrane;					IPR000008;	C2 domain;
A0FGR8	748	S	Extended synaptotagmin-2	ESYT2		0.922		1.167	1.156	1.197		0.797578		0.797578		......S..E...	ASPGHISVKEPTP	nucl		membrane; cell part; cell periphery; membrane part; intrinsic to membrane; cell; integral to membrane; plasma membrane;					IPR000008;	C2 domain;
A0FGR8	753	T	Extended synaptotagmin-2	ESYT2		1.705		1.167	1.156	1.197		1.47491		1.47491		......TP.....	ISVKEPTPSIASD	nucl		membrane; cell part; cell periphery; membrane part; intrinsic to membrane; cell; integral to membrane; plasma membrane;					IPR000008;	C2 domain;
A0FGR8	755	S	Extended synaptotagmin-2	ESYT2	1.644	1.72	1.568	1.167	1.156	1.197	1.40874	1.48789	1.30994	1.40219	0.0175391		VKEPTPSIASDIS	nucl		membrane; cell part; cell periphery; membrane part; intrinsic to membrane; cell; integral to membrane; plasma membrane;					IPR000008;	C2 domain;
A0FGR8	758	S	Extended synaptotagmin-2	ESYT2	1.855	1.677	1.642	1.167	1.156	1.197	1.58955	1.45069	1.37176	1.47067	0.0182621	......SD.....	PTPSIASDISLPI	nucl		membrane; cell part; cell periphery; membrane part; intrinsic to membrane; cell; integral to membrane; plasma membrane;					IPR000008;	C2 domain;
A0FGR8	761	S	Extended synaptotagmin-2	ESYT2	1.135	1.201	1.568	1.167	1.156	1.197	0.972579	1.03893	1.30994	1.10715	0.487048	......SL.....	SIASDISLPIATQ	nucl		membrane; cell part; cell periphery; membrane part; intrinsic to membrane; cell; integral to membrane; plasma membrane;					IPR000008;	C2 domain;
A0JLT2	226	S	Mediator of RNA polymerase II transcription subunit 19	MED19	0.967	0.954	1									..K...SP.....	KKKNRHSPDHPGM	nucl		intracellular organelle; intracellular organelle part; nuclear lumen; macromolecular complex; intracellular part; cell; organelle part; membrane-enclosed lumen; organelle; intracellular membrane-bounded organelle; nucleoplasm; nucleus; intracellular organelle lumen; mediator complex; cell part; intracellular; membrane-bounded organelle; protein complex; nucleoplasm part; organelle lumen; nuclear …	transcription factor binding transcription factor activity; RNA polymerase II transcription cofactor activity; RNA polymerase II transcription factor binding transcription factor activity; transcription cofactor activity; protein binding transcription factor activity;	K15137					Mediator complex; TRAP-SMCC mediator complex;
A0MZ66	375	S	Shootin-1	KIAA1598	3.152	2.225	2.721	0.88	0.883	0.916	3.58182	2.51982	2.97052	3.02405	0.0126382	......S..R...	PIRSLMSMIRKRS	nucl	cellular component organization; single-multicellular organism process; cellular developmental process; neuron development; neurogenesis; cellular component morphogenesis; single-organism process; response to stimulus; cell development; axon guidance; cell morphogenesis involved in differentiation; anatomical structure morphogenesis; response to external stimulus; cell differentiation; cell morph…	axon; cell projection; cell; cell part; neuron part; neuron projection;
A0MZ66	494	S	Shootin-1	KIAA1598	0.947		1.063	0.88	0.883	0.916	1.07614		1.16048	1.11831		......SP.....	AEADSSSPTGILA	nucl	cellular component organization; single-multicellular organism process; cellular developmental process; neuron development; neurogenesis; cellular component morphogenesis; single-organism process; response to stimulus; cell development; axon guidance; cell morphogenesis involved in differentiation; anatomical structure morphogenesis; response to external stimulus; cell differentiation; cell morph…	axon; cell projection; cell; cell part; neuron part; neuron projection;
A0MZ66	506	S	Shootin-1	KIAA1598	1.641	1.809	1.256	0.88	0.883	0.916	1.86477	2.0487	1.37118	1.76155	0.0653535		ATSESKSMPVLGS	nucl	cellular component organization; single-multicellular organism process; cellular developmental process; neuron development; neurogenesis; cellular component morphogenesis; single-organism process; response to stimulus; cell development; axon guidance; cell morphogenesis involved in differentiation; anatomical structure morphogenesis; response to external stimulus; cell differentiation; cell morph…	axon; cell projection; cell; cell part; neuron part; neuron projection;
A0PJW8	10	S	Death-associated protein-like 1	DAPL1	2.944		2.918									......SP.K...	EVQDLLSPRKGGH	cyto	developmental process; cell differentiation; death; cell death; cellular developmental process; apoptotic process; single-organism cellular process; single-organism process; programmed cell death; cellular process;
A1KXE4	6	S	Myelin-associated neurite-outgrowth inhibitor	FAM168B			2.135										-MNPVYSPGSSGV	mito		membrane; cell projection; cell periphery; cytoplasm; intrinsic to membrane; intracellular part; cell; integral to membrane; plasma membrane; axon; cell part; membrane part; intracellular; neuron projection; perinuclear region of cytoplasm; neuron part; cytoplasmic part;
A1L170	223	S	Uncharacterized protein C1orf226	C1orf226			0.717									...R..SP.....	ECRRASSPSLIER	nucl
A1L390	76	S	Pleckstrin homology domain-containing family G member 3	PLEKHG3	1.859	1.937	2.004	1.268	1.238	1.216	1.46609	1.56462	1.64803	1.55958	0.00862897	....P.SP.....	NVKGPLSPFNSRA	nucl	regulation of cellular process; regulation of biological process; regulation of cell communication; regulation of signaling; regulation of response to stimulus; regulation of Ras protein signal transduction; regulation of Rho protein signal transduction; regulation of signal transduction; regulation of small GTPase mediated signal transduction; biological regulation;	cell; intracellular; cell part;	enzyme regulator activity; guanyl-nucleotide exchange factor activity; nucleoside-triphosphatase regulator activity; binding; GTPase regulator activity; phospholipid binding; ion binding; lipid binding; anion binding; Ras guanyl-nucleotide exchange factor activity; small GTPase regulator activity; Rho guanyl-nucleotide exchange factor activity;				IPR011993; IPR000219; IPR001849;	Dbl homology (DH) domain; Pleckstrin homology-like domain; Pleckstrin homology domain;
A1L390	423	S	Pleckstrin homology domain-containing family G member 3	PLEKHG3	1.25			1.268	1.238	1.216	0.985804			0.985804		......SP.R...	PNRYRCSPERLKK	nucl	regulation of cellular process; regulation of biological process; regulation of cell communication; regulation of signaling; regulation of response to stimulus; regulation of Ras protein signal transduction; regulation of Rho protein signal transduction; regulation of signal transduction; regulation of small GTPase mediated signal transduction; biological regulation;	cell; intracellular; cell part;	enzyme regulator activity; guanyl-nucleotide exchange factor activity; nucleoside-triphosphatase regulator activity; binding; GTPase regulator activity; phospholipid binding; ion binding; lipid binding; anion binding; Ras guanyl-nucleotide exchange factor activity; small GTPase regulator activity; Rho guanyl-nucleotide exchange factor activity;				IPR011993; IPR000219; IPR001849;	Dbl homology (DH) domain; Pleckstrin homology-like domain; Pleckstrin homology domain;
A1L390	614	S	Pleckstrin homology domain-containing family G member 3	PLEKHG3	3.845			1.268	1.238	1.216	3.03233			3.03233			RFVSSFSRRSSVA	nucl	regulation of cellular process; regulation of biological process; regulation of cell communication; regulation of signaling; regulation of response to stimulus; regulation of Ras protein signal transduction; regulation of Rho protein signal transduction; regulation of signal transduction; regulation of small GTPase mediated signal transduction; biological regulation;	cell; intracellular; cell part;	enzyme regulator activity; guanyl-nucleotide exchange factor activity; nucleoside-triphosphatase regulator activity; binding; GTPase regulator activity; phospholipid binding; ion binding; lipid binding; anion binding; Ras guanyl-nucleotide exchange factor activity; small GTPase regulator activity; Rho guanyl-nucleotide exchange factor activity;				IPR011993; IPR000219; IPR001849;	Dbl homology (DH) domain; Pleckstrin homology-like domain; Pleckstrin homology domain;
A1L390	640	S	Pleckstrin homology domain-containing family G member 3	PLEKHG3	2.313			1.268	1.238	1.216	1.82413			1.82413		...RS.S......	LVSRSSSVLSLEG	nucl	regulation of cellular process; regulation of biological process; regulation of cell communication; regulation of signaling; regulation of response to stimulus; regulation of Ras protein signal transduction; regulation of Rho protein signal transduction; regulation of signal transduction; regulation of small GTPase mediated signal transduction; biological regulation;	cell; intracellular; cell part;	enzyme regulator activity; guanyl-nucleotide exchange factor activity; nucleoside-triphosphatase regulator activity; binding; GTPase regulator activity; phospholipid binding; ion binding; lipid binding; anion binding; Ras guanyl-nucleotide exchange factor activity; small GTPase regulator activity; Rho guanyl-nucleotide exchange factor activity;				IPR011993; IPR000219; IPR001849;	Dbl homology (DH) domain; Pleckstrin homology-like domain; Pleckstrin homology domain;
A1L390	643	S	Pleckstrin homology domain-containing family G member 3	PLEKHG3	0.91			1.268	1.238	1.216	0.717666			0.717666		......SL.....	RSSSVLSLEGSEK	nucl	regulation of cellular process; regulation of biological process; regulation of cell communication; regulation of signaling; regulation of response to stimulus; regulation of Ras protein signal transduction; regulation of Rho protein signal transduction; regulation of signal transduction; regulation of small GTPase mediated signal transduction; biological regulation;	cell; intracellular; cell part;	enzyme regulator activity; guanyl-nucleotide exchange factor activity; nucleoside-triphosphatase regulator activity; binding; GTPase regulator activity; phospholipid binding; ion binding; lipid binding; anion binding; Ras guanyl-nucleotide exchange factor activity; small GTPase regulator activity; Rho guanyl-nucleotide exchange factor activity;				IPR011993; IPR000219; IPR001849;	Dbl homology (DH) domain; Pleckstrin homology-like domain; Pleckstrin homology domain;
A1L390	741	S	Pleckstrin homology domain-containing family G member 3	PLEKHG3	1.525	1.468	1.447	1.268	1.238	1.216	1.20268	1.18578	1.18997	1.19281	0.00087181	...RR.S......	SVRRRESLSYIPK	nucl	regulation of cellular process; regulation of biological process; regulation of cell communication; regulation of signaling; regulation of response to stimulus; regulation of Ras protein signal transduction; regulation of Rho protein signal transduction; regulation of signal transduction; regulation of small GTPase mediated signal transduction; biological regulation;	cell; intracellular; cell part;	enzyme regulator activity; guanyl-nucleotide exchange factor activity; nucleoside-triphosphatase regulator activity; binding; GTPase regulator activity; phospholipid binding; ion binding; lipid binding; anion binding; Ras guanyl-nucleotide exchange factor activity; small GTPase regulator activity; Rho guanyl-nucleotide exchange factor activity;				IPR011993; IPR000219; IPR001849;	Dbl homology (DH) domain; Pleckstrin homology-like domain; Pleckstrin homology domain;
A1L390	827	S	Pleckstrin homology domain-containing family G member 3	PLEKHG3		1.408		1.268	1.238	1.216		1.13732		1.13732		......SP.K...	MESSGGSPGKGPG	nucl	regulation of cellular process; regulation of biological process; regulation of cell communication; regulation of signaling; regulation of response to stimulus; regulation of Ras protein signal transduction; regulation of Rho protein signal transduction; regulation of signal transduction; regulation of small GTPase mediated signal transduction; biological regulation;	cell; intracellular; cell part;	enzyme regulator activity; guanyl-nucleotide exchange factor activity; nucleoside-triphosphatase regulator activity; binding; GTPase regulator activity; phospholipid binding; ion binding; lipid binding; anion binding; Ras guanyl-nucleotide exchange factor activity; small GTPase regulator activity; Rho guanyl-nucleotide exchange factor activity;				IPR011993; IPR000219; IPR001849;	Dbl homology (DH) domain; Pleckstrin homology-like domain; Pleckstrin homology domain;
A1L390	1028	S	Pleckstrin homology domain-containing family G member 3	PLEKHG3	1.61			1.268	1.238	1.216	1.26972			1.26972		...R..SP.....	VSQRTTSPGGRPS	nucl	regulation of cellular process; regulation of biological process; regulation of cell communication; regulation of signaling; regulation of response to stimulus; regulation of Ras protein signal transduction; regulation of Rho protein signal transduction; regulation of signal transduction; regulation of small GTPase mediated signal transduction; biological regulation;	cell; intracellular; cell part;	enzyme regulator activity; guanyl-nucleotide exchange factor activity; nucleoside-triphosphatase regulator activity; binding; GTPase regulator activity; phospholipid binding; ion binding; lipid binding; anion binding; Ras guanyl-nucleotide exchange factor activity; small GTPase regulator activity; Rho guanyl-nucleotide exchange factor activity;				IPR011993; IPR000219; IPR001849;	Dbl homology (DH) domain; Pleckstrin homology-like domain; Pleckstrin homology domain;
A1L390	1037	S	Pleckstrin homology domain-containing family G member 3	PLEKHG3	0.988	1.071	1.189	1.268	1.238	1.216	0.77918	0.865105	0.977796	0.874027	0.225917	.R....SP.....	GRPSARSPLSPTE	nucl	regulation of cellular process; regulation of biological process; regulation of cell communication; regulation of signaling; regulation of response to stimulus; regulation of Ras protein signal transduction; regulation of Rho protein signal transduction; regulation of signal transduction; regulation of small GTPase mediated signal transduction; biological regulation;	cell; intracellular; cell part;	enzyme regulator activity; guanyl-nucleotide exchange factor activity; nucleoside-triphosphatase regulator activity; binding; GTPase regulator activity; phospholipid binding; ion binding; lipid binding; anion binding; Ras guanyl-nucleotide exchange factor activity; small GTPase regulator activity; Rho guanyl-nucleotide exchange factor activity;				IPR011993; IPR000219; IPR001849;	Dbl homology (DH) domain; Pleckstrin homology-like domain; Pleckstrin homology domain;
A1L390	1040	S	Pleckstrin homology domain-containing family G member 3	PLEKHG3	0.653	0.712	0.646	1.268	1.238	1.216	0.514984	0.575121	0.53125	0.540452	0.00424069	....P.SP.....	SARSPLSPTETFS	nucl	regulation of cellular process; regulation of biological process; regulation of cell communication; regulation of signaling; regulation of response to stimulus; regulation of Ras protein signal transduction; regulation of Rho protein signal transduction; regulation of signal transduction; regulation of small GTPase mediated signal transduction; biological regulation;	cell; intracellular; cell part;	enzyme regulator activity; guanyl-nucleotide exchange factor activity; nucleoside-triphosphatase regulator activity; binding; GTPase regulator activity; phospholipid binding; ion binding; lipid binding; anion binding; Ras guanyl-nucleotide exchange factor activity; small GTPase regulator activity; Rho guanyl-nucleotide exchange factor activity;				IPR011993; IPR000219; IPR001849;	Dbl homology (DH) domain; Pleckstrin homology-like domain; Pleckstrin homology domain;
A1L390	1081	S	Pleckstrin homology domain-containing family G member 3	PLEKHG3	2.25	2.215	2.266	1.268	1.238	1.216	1.77445	1.78918	1.86349	1.80904	0.000976692	...RS.S......	PVNRSHSVPENMV	nucl	regulation of cellular process; regulation of biological process; regulation of cell communication; regulation of signaling; regulation of response to stimulus; regulation of Ras protein signal transduction; regulation of Rho protein signal transduction; regulation of signal transduction; regulation of small GTPase mediated signal transduction; biological regulation;	cell; intracellular; cell part;	enzyme regulator activity; guanyl-nucleotide exchange factor activity; nucleoside-triphosphatase regulator activity; binding; GTPase regulator activity; phospholipid binding; ion binding; lipid binding; anion binding; Ras guanyl-nucleotide exchange factor activity; small GTPase regulator activity; Rho guanyl-nucleotide exchange factor activity;				IPR011993; IPR000219; IPR001849;	Dbl homology (DH) domain; Pleckstrin homology-like domain; Pleckstrin homology domain;
A1L390	1169	S	Pleckstrin homology domain-containing family G member 3	PLEKHG3	1.532			1.268	1.238	1.216	1.2082			1.2082		....P.SP.....	SGQGPSSPVALLG	nucl	regulation of cellular process; regulation of biological process; regulation of cell communication; regulation of signaling; regulation of response to stimulus; regulation of Ras protein signal transduction; regulation of Rho protein signal transduction; regulation of signal transduction; regulation of small GTPase mediated signal transduction; biological regulation;	cell; intracellular; cell part;	enzyme regulator activity; guanyl-nucleotide exchange factor activity; nucleoside-triphosphatase regulator activity; binding; GTPase regulator activity; phospholipid binding; ion binding; lipid binding; anion binding; Ras guanyl-nucleotide exchange factor activity; small GTPase regulator activity; Rho guanyl-nucleotide exchange factor activity;				IPR011993; IPR000219; IPR001849;	Dbl homology (DH) domain; Pleckstrin homology-like domain; Pleckstrin homology domain;
A1X283	291	S	SH3 and PX domain-containing protein 2B	SH3PXD2B	1.631	1.388	1.485									....P.SP.....	PKPGPGSPSHPGA	mito	superoxide metabolic process; cellular component biogenesis; cellular developmental process; single-organism process; cellular metabolic process; metabolic process; heart development; cell communication; cellular component assembly; macromolecular complex assembly; extracellular matrix disassembly; extracellular matrix organization; connective tissue development; protein localization; macromolecu…	intracellular organelle; cell projection; intracellular non-membrane-bounded organelle; cytoskeletal part; cell junction; intracellular organelle part; cytoplasm; macromolecular complex; intracellular part; podosome; cell; actin cytoskeleton; organelle part; non-membrane-bounded organelle; cytoskeleton; organelle; cell part; intracellular; protein complex;	phosphatidylinositol phosphate binding; phosphatidylinositol-3-phosphate binding; phosphatidylinositol-5-phosphate binding; binding; SH2 domain binding; phospholipid binding; phosphatidylinositol binding; ion binding; lipid binding; phosphatidylinositol-3,5-bisphosphate binding; protein binding; protein domain specific binding; anion binding; phosphatidylinositol-4-phosphate binding;				IPR011511; IPR001452; IPR001683;	Variant SH3 domain; SH3 domain; Phox homologous domain;
A1X283	675	S	SH3 and PX domain-containing protein 2B	SH3PXD2B		1.602											KLRPAKSQDKSLL	mito	superoxide metabolic process; cellular component biogenesis; cellular developmental process; single-organism process; cellular metabolic process; metabolic process; heart development; cell communication; cellular component assembly; macromolecular complex assembly; extracellular matrix disassembly; extracellular matrix organization; connective tissue development; protein localization; macromolecu…	intracellular organelle; cell projection; intracellular non-membrane-bounded organelle; cytoskeletal part; cell junction; intracellular organelle part; cytoplasm; macromolecular complex; intracellular part; podosome; cell; actin cytoskeleton; organelle part; non-membrane-bounded organelle; cytoskeleton; organelle; cell part; intracellular; protein complex;	phosphatidylinositol phosphate binding; phosphatidylinositol-3-phosphate binding; phosphatidylinositol-5-phosphate binding; binding; SH2 domain binding; phospholipid binding; phosphatidylinositol binding; ion binding; lipid binding; phosphatidylinositol-3,5-bisphosphate binding; protein binding; protein domain specific binding; anion binding; phosphatidylinositol-4-phosphate binding;				IPR011511; IPR001452; IPR001683;	Variant SH3 domain; SH3 domain; Phox homologous domain;
A1X283	770	S	SH3 and PX domain-containing protein 2B	SH3PXD2B	2.432		2.091									...K..S......	PPKKTSSSSRPLP	mito	superoxide metabolic process; cellular component biogenesis; cellular developmental process; single-organism process; cellular metabolic process; metabolic process; heart development; cell communication; cellular component assembly; macromolecular complex assembly; extracellular matrix disassembly; extracellular matrix organization; connective tissue development; protein localization; macromolecu…	intracellular organelle; cell projection; intracellular non-membrane-bounded organelle; cytoskeletal part; cell junction; intracellular organelle part; cytoplasm; macromolecular complex; intracellular part; podosome; cell; actin cytoskeleton; organelle part; non-membrane-bounded organelle; cytoskeleton; organelle; cell part; intracellular; protein complex;	phosphatidylinositol phosphate binding; phosphatidylinositol-3-phosphate binding; phosphatidylinositol-5-phosphate binding; binding; SH2 domain binding; phospholipid binding; phosphatidylinositol binding; ion binding; lipid binding; phosphatidylinositol-3,5-bisphosphate binding; protein binding; protein domain specific binding; anion binding; phosphatidylinositol-4-phosphate binding;				IPR011511; IPR001452; IPR001683;	Variant SH3 domain; SH3 domain; Phox homologous domain;
A1Z1Q3	22	T	O-acetyl-ADP-ribose deacetylase MACROD2	MACROD2													ERLLKMTLEERRK	nucl	single-multicellular organism process; purine nucleoside metabolic process; nucleoside metabolic process; cellular aromatic compound metabolic process; brain development; single-organism process; cellular metabolic process; organic substance metabolic process; metabolic process; heterocycle metabolic process; nucleobase-containing compound metabolic process; carbohydrate derivative metabolic proc…		deacetylase activity; hydrolase activity; catalytic activity;				IPR002589;	Macro domain;
A2A2Y4	416	S	FERM domain-containing protein 3	FRMD3			0.419									......SP.K...	APLISSSPVKAAR	mito		membrane; cytoskeleton; organelle; intracellular organelle; extrinsic to membrane; intracellular non-membrane-bounded organelle; membrane part; cell part; intracellular; cytoplasm; intrinsic to membrane; intracellular part; cell; integral to membrane; non-membrane-bounded organelle;					IPR018979; IPR019749; IPR019748; IPR018980; IPR011993; IPR014847; IPR014352; IPR000299;	Pleckstrin homology-like domain; FERM adjacent (FA); FERM, N-terminal; FERM, C-terminal PH-like domain; FERM/acyl-CoA-binding protein, 3-helical bundle; FERM central domain; Band 4.1 domain; FERM domain;
A2A3K4	392	S	Protein tyrosine phosphatase domain-containing protein 1	PTPDC1		3.46	2.434									...RR.S......	HLKRRLSYSDSDL	nucl	cellular component organization; cellular developmental process; cellular protein metabolic process; cellular component morphogenesis; cilium morphogenesis; single-organism process; cellular metabolic process; phosphate-containing compound metabolic process; organic substance metabolic process; anatomical structure morphogenesis; metabolic process; cell part morphogenesis; cell projection morphog…	cilium; organelle; intracellular membrane-bounded organelle; intracellular organelle; cell projection; cell part; intracellular; intracellular part; membrane-bounded organelle; cell;	protein tyrosine phosphatase activity; catalytic activity; phosphoric ester hydrolase activity; phosphatase activity; hydrolase activity, acting on ester bonds; hydrolase activity; phosphoprotein phosphatase activity; protein tyrosine/serine/threonine phosphatase activity;	K18078			IPR000387; IPR000340;	Protein-tyrosine/Dual specificity phosphatase; Dual specificity phosphatase, catalytic domain;
A2AJT9	402	S	Uncharacterized protein CXorf23	CXorf23	1.972		1.391									......SP...R.	LPDVKPSPINLRK	nucl		organelle; intracellular membrane-bounded organelle; intracellular organelle; cell part; intracellular; cytoplasm; intracellular part; membrane-bounded organelle; cell; mitochondrion; cytoplasmic part;
A2RU67	62	S	Uncharacterized protein KIAA1467	KIAA1467		1.091										......SD.E...	EAPEPDSDAEVAE	plas		intrinsic to membrane; membrane; integral to membrane; membrane part;					IPR027295; IPR011047;	Quinonprotein alcohol dehydrogenase-like superfamily; Quinonprotein alcohol dehydrogenase-like domain;
A3KN83	214	S	Protein strawberry notch homolog 1	SBNO1	0.935	0.932	0.95	0.866	0.918	0.92	1.07968	1.01525	1.03261	1.04251	0.207507	...RS.SP.....	MKMRSFSPTMKVP	nucl	regulation of cellular process; regulation of gene expression; regulation of transcription, DNA-dependent; regulation of cellular biosynthetic process; regulation of primary metabolic process; regulation of macromolecule metabolic process; regulation of nucleobase-containing compound metabolic process; regulation of macromolecule biosynthetic process; regulation of cellular metabolic process; reg…						IPR026937; IPR027417;	Strawberry notch, helicase C domain; P-loop containing nucleoside triphosphate hydrolase;
A4D2P6	982	S	Delphilin	GRID2IP												...R..SL.....	YKTRLRSLHFQAT	nucl	regulation of cellular process; cellular component organization; regulation of biological quality; negative regulation of synaptic transmission; regulation of synaptic transmission; regulation of signaling; single-organism cellular process; long term synaptic depression; negative regulation of multicellular organismal process; single-organism process; negative regulation of biological process; ne…	membrane; cell part; cell periphery; cell junction; synaptic membrane; cell; synapse part; plasma membrane; synapse; postsynaptic membrane;					IPR001478; IPR015425;	Formin, FH2 domain; PDZ domain;
A5PL33	253	S	Protein KRBA1	KRBA1		1.58										....P.SP.....	ADLGPGSPPWAVK	nucl
A5YKK6	1061	S	CCR4-NOT transcription complex subunit 1	CNOT1	1.654		2.062	0.961	0.953	0.959	1.72112		2.15016	1.93564		......SF.....	TRPTGVSFKKDVP	cyto	regulation of cellular process; RNA 3'-end processing; cellular aromatic compound metabolic process; mRNA 3'-end processing; regulation of macromolecule metabolic process; regulation of nucleobase-containing compound metabolic process; biosynthetic process; cellular metabolic process; organic substance metabolic process; regulation of RNA biosynthetic process; cellular nitrogen compound catabolic…	membrane; microbody membrane; intracellular organelle; peroxisomal part; organelle membrane; intracellular non-membrane-bounded organelle; peroxisome; intracellular organelle part; cytoplasmic mRNA processing body; cytoplasm; microbody part; macromolecular complex; intracellular part; cytosol; cell; organelle part; peroxisomal membrane; non-membrane-bounded organelle; intracellular membrane-bound…		K12604	CNOT1; CCR4-NOT transcription complex subunit 1	hsa03018 RNA degradation - Homo sapiens (human);	IPR007196; IPR024557;	CCR4-Not complex component, Not1, C-terminal; CCR4-Not complex, Not1 subunit, domain of unknown function DUF3819;
A6H8Y1	2227	S	Transcription factor TFIIIB component B'' homolog	BDP1	1.18											......S.E....	RGLGENSVEEPQI	nucl	regulation of cellular process; cellular aromatic compound metabolic process; regulation of macromolecule metabolic process; regulation of nucleobase-containing compound metabolic process; biosynthetic process; cellular metabolic process; organic substance metabolic process; regulation of RNA biosynthetic process; metabolic process; heterocycle metabolic process; nucleobase-containing compound me…	intracellular organelle; intracellular organelle part; nuclear lumen; intracellular part; cell; organelle part; organelle; intracellular membrane-bounded organelle; membrane-enclosed lumen; nucleoplasm; nucleus; intracellular organelle lumen; cell part; intracellular; membrane-bounded organelle; organelle lumen; nuclear part;	organic cyclic compound binding; heterocyclic compound binding; DNA binding; chromatin binding; binding; nucleic acid binding;	K15198			IPR001005; IPR009057;	Homeodomain-like; SANT/Myb domain;	5S-DNA-TFIIIA-TFIIIC2-TFIIIB subcomplex;
A6ND36	4	S	Protein FAM83G	FAM83G	1.029	1.022	1.056										---MAFSQVQCLD	nucl
A6ND36	650	S	Protein FAM83G	FAM83G	1.868	1.806	1.778									...R..S......	PPRRQLSAPHITR	nucl
A6NFI3	10	S	Zinc finger protein 316	ZNF316	1.041	1.043	1.012									....P.SP.....	LHTTPDSPAAQLE	nucl	regulation of cellular process; cellular aromatic compound metabolic process; regulation of macromolecule metabolic process; regulation of nucleobase-containing compound metabolic process; biosynthetic process; cellular metabolic process; organic substance metabolic process; regulation of RNA biosynthetic process; metabolic process; heterocycle metabolic process; nucleobase-containing compound me…	organelle; intracellular membrane-bounded organelle; intracellular organelle; nucleus; cell part; intracellular; intracellular part; membrane-bounded organelle; cell;	organic cyclic compound binding; heterocyclic compound binding; DNA binding; transition metal ion binding; binding; ion binding; nucleic acid binding; metal ion binding; cation binding; zinc ion binding;	K09228			IPR015880; IPR007087; IPR001909; IPR013087;	Zinc finger, C2H2-like; Krueppel-associated box; Zinc finger C2H2-type/integrase DNA-binding domain; Zinc finger, C2H2;
A6NFI3	112	S	Zinc finger protein 316	ZNF316	0.975	1.048	1.004									.....KSP.....	RGGDAKSPVLQEK	nucl	regulation of cellular process; cellular aromatic compound metabolic process; regulation of macromolecule metabolic process; regulation of nucleobase-containing compound metabolic process; biosynthetic process; cellular metabolic process; organic substance metabolic process; regulation of RNA biosynthetic process; metabolic process; heterocycle metabolic process; nucleobase-containing compound me…	organelle; intracellular membrane-bounded organelle; intracellular organelle; nucleus; cell part; intracellular; intracellular part; membrane-bounded organelle; cell;	organic cyclic compound binding; heterocyclic compound binding; DNA binding; transition metal ion binding; binding; ion binding; nucleic acid binding; metal ion binding; cation binding; zinc ion binding;	K09228			IPR015880; IPR007087; IPR001909; IPR013087;	Zinc finger, C2H2-like; Krueppel-associated box; Zinc finger C2H2-type/integrase DNA-binding domain; Zinc finger, C2H2;
A6NHT5	153	S	Homeobox protein HMX3	HMX3	1.098	1.203	1.22		0.871			1.38117		1.38117		......SP....K	SGTDRDSPEPLLK	nucl	reproductive process; brain development; embryo implantation; cellular developmental process; single-organism process; biosynthetic process; inner ear morphogenesis; cellular metabolic process; neurological system process; metabolic process; embryonic organ morphogenesis; single organism reproductive process; multi-multicellular organism process; macromolecule metabolic process; embryo developmen…	organelle; intracellular membrane-bounded organelle; intracellular organelle; nucleus; cell part; intracellular; intracellular part; membrane-bounded organelle; cell;	organic cyclic compound binding; heterocyclic compound binding; DNA binding; binding; nucleic acid binding transcription factor activity; nucleic acid binding; sequence-specific DNA binding; sequence-specific DNA binding transcription factor activity;	K09349			IPR001356; IPR020479; IPR009057;	Homeodomain, metazoa; Homeodomain-like; Homeobox domain;
A6NHT5	180	S	Homeobox protein HMX3	HMX3			1.006		0.871							......SD.E...	EIILEESDSEESK	nucl	reproductive process; brain development; embryo implantation; cellular developmental process; single-organism process; biosynthetic process; inner ear morphogenesis; cellular metabolic process; neurological system process; metabolic process; embryonic organ morphogenesis; single organism reproductive process; multi-multicellular organism process; macromolecule metabolic process; embryo developmen…	organelle; intracellular membrane-bounded organelle; intracellular organelle; nucleus; cell part; intracellular; intracellular part; membrane-bounded organelle; cell;	organic cyclic compound binding; heterocyclic compound binding; DNA binding; binding; nucleic acid binding transcription factor activity; nucleic acid binding; sequence-specific DNA binding; sequence-specific DNA binding transcription factor activity;	K09349			IPR001356; IPR020479; IPR009057;	Homeodomain, metazoa; Homeodomain-like; Homeobox domain;
A6NIE6	44	S	Putative RRN3-like protein RRN3P2	RRN3P2	0.816		0.859									......SP.R...	ENDFFNSPPRKTV	cyto
A6NKF1	402	S	SAC3 domain-containing protein 1	SAC3D1	1.007	0.976	1.044	0.895	0.862	1.006	1.12514	1.13225	1.03777	1.09839	0.113544		GTDRPGSPA----	cyto_nucl	cellular component biogenesis; mitotic cell cycle; cellular component organization; centrosome cycle; protein complex subunit organization; centrosome duplication; mitosis; organelle fission; centrosome organization; single-organism cellular process; spindle organization; single-organism process; microtubule-based process; macromolecular complex subunit organization; microtubule cytoskeleton orga…	intracellular organelle; intracellular non-membrane-bounded organelle; cytoskeletal part; cytoplasm; intracellular organelle part; macromolecular complex; intracellular part; cell; spindle; organelle part; non-membrane-bounded organelle; organelle; cytoskeleton; microtubule organizing center; microtubule cytoskeleton; centrosome; cell part; intracellular; protein complex;		K16734
A6NKT7	1305	S	RanBP2-like and GRIP domain-containing protein 3	RGPD3		1.671			1.088	1.027		1.53585		1.53585		......SP.K...	ALSLSKSPAKLNQ	nucl	intracellular transport; protein localization to Golgi apparatus; establishment of protein localization to organelle; intra-Golgi vesicle-mediated transport; vesicle-mediated transport; retrograde transport, vesicle recycling within Golgi; establishment of protein localization to Golgi; single-organism cellular process; Golgi vesicle transport; single-organism process; organic substance transport…						IPR000156; IPR011990; IPR011993; IPR000237; IPR013026;	Pleckstrin homology-like domain; Ran binding domain; Tetratricopeptide-like helical; Tetratricopeptide repeat-containing domain; GRIP;
A7E2S9	5	S	Putative ankyrin repeat domain-containing protein 30B-like	ANKRD30BL	1.331		1.394										--MERLSAAPVKG	cyto_nucl							IPR020683;	Ankyrin repeat-containing domain;
A7E2V4	1092	S	Zinc finger SWIM domain-containing protein 8	ZSWIM8			2.215	1.114	1.108							....P.SP.....	PESSPHSPCEGLP	plas			cation binding; metal ion binding; zinc ion binding; transition metal ion binding; binding; ion binding;				IPR007527;	Zinc finger, SWIM-type;
A7E2V4	1130	S	Zinc finger SWIM domain-containing protein 8	ZSWIM8	1			1.114	1.108		0.897666			0.897666		......SP.R...	NGRGWGSPGRPKK	plas			cation binding; metal ion binding; zinc ion binding; transition metal ion binding; binding; ion binding;				IPR007527;	Zinc finger, SWIM-type;
A7KAX9	706	S	Rho GTPase-activating protein 32	ARHGAP32		1.061										......S.E....	TLRSAKSEESLTS	nucl	single organism signaling; regulation of cellular process; regulation of signaling; regulation of nucleobase-containing compound metabolic process; single-organism process; regulation of nucleoside metabolic process; regulation of nucleotide catabolic process; response to stimulus; signal transduction; regulation of cell communication; cell communication; positive regulation of hydrolase activity…	membrane; endoplasmic reticulum; nuclear outer membrane-endoplasmic reticulum membrane network; cell cortex; organelle membrane; cell junction; cell periphery; cytoplasm; intracellular part; cell; organelle part; non-membrane-bounded organelle; cytoskeleton; membrane part; intracellular; cell part; postsynaptic density; synaptic membrane; Golgi apparatus part; endosome; membrane-bounded organelle…	enzyme regulator activity; binding; nucleoside-triphosphatase regulator activity; phosphatidylinositol binding; phospholipid binding; ion binding; GTPase regulator activity; lipid binding; anion binding; enzyme activator activity; GTPase activator activity;				IPR001452; IPR001683; IPR008936; IPR000198;	SH3 domain; Rho GTPase activation protein; Phox homologous domain; Rho GTPase-activating protein domain;
A7KAX9	892	S	Rho GTPase-activating protein 32	ARHGAP32	1.853	1.568										......SP...R.	KVVYAFSPKIGRK	nucl	single organism signaling; regulation of cellular process; regulation of signaling; regulation of nucleobase-containing compound metabolic process; single-organism process; regulation of nucleoside metabolic process; regulation of nucleotide catabolic process; response to stimulus; signal transduction; regulation of cell communication; cell communication; positive regulation of hydrolase activity…	membrane; endoplasmic reticulum; nuclear outer membrane-endoplasmic reticulum membrane network; cell cortex; organelle membrane; cell junction; cell periphery; cytoplasm; intracellular part; cell; organelle part; non-membrane-bounded organelle; cytoskeleton; membrane part; intracellular; cell part; postsynaptic density; synaptic membrane; Golgi apparatus part; endosome; membrane-bounded organelle…	enzyme regulator activity; binding; nucleoside-triphosphatase regulator activity; phosphatidylinositol binding; phospholipid binding; ion binding; GTPase regulator activity; lipid binding; anion binding; enzyme activator activity; GTPase activator activity;				IPR001452; IPR001683; IPR008936; IPR000198;	SH3 domain; Rho GTPase activation protein; Phox homologous domain; Rho GTPase-activating protein domain;
A7MD48	276	T	Serine/arginine repetitive matrix protein 4	SRRM4													KTASPLTTSRGRS	nucl	regulation of cellular process; single-multicellular organism process; cellular aromatic compound metabolic process; regulation of macromolecule metabolic process; regulation of nucleobase-containing compound metabolic process; cellular developmental process; single-organism process; cellular metabolic process; organic substance metabolic process; metabolic process; cell differentiation; heterocy…	organelle; intracellular membrane-bounded organelle; intracellular organelle; nucleus; cell part; intracellular; intracellular part; membrane-bounded organelle; cell;	organic cyclic compound binding; heterocyclic compound binding; mRNA binding; RNA binding; binding; nucleic acid binding;
A7MD48	277	T	Serine/arginine repetitive matrix protein 4	SRRM4													TASPLTTSRGRSQ	nucl	regulation of cellular process; single-multicellular organism process; cellular aromatic compound metabolic process; regulation of macromolecule metabolic process; regulation of nucleobase-containing compound metabolic process; cellular developmental process; single-organism process; cellular metabolic process; organic substance metabolic process; metabolic process; cell differentiation; heterocy…	organelle; intracellular membrane-bounded organelle; intracellular organelle; nucleus; cell part; intracellular; intracellular part; membrane-bounded organelle; cell;	organic cyclic compound binding; heterocyclic compound binding; mRNA binding; RNA binding; binding; nucleic acid binding;
A7MD48	278	S	Serine/arginine repetitive matrix protein 4	SRRM4												......S..R...	ASPLTTSRGRSQE	nucl	regulation of cellular process; single-multicellular organism process; cellular aromatic compound metabolic process; regulation of macromolecule metabolic process; regulation of nucleobase-containing compound metabolic process; cellular developmental process; single-organism process; cellular metabolic process; organic substance metabolic process; metabolic process; cell differentiation; heterocy…	organelle; intracellular membrane-bounded organelle; intracellular organelle; nucleus; cell part; intracellular; intracellular part; membrane-bounded organelle; cell;	organic cyclic compound binding; heterocyclic compound binding; mRNA binding; RNA binding; binding; nucleic acid binding;
A8CG34	81	S	Nuclear envelope pore membrane protein POM 121C	POM121C	1.021	1.032	0.943		1.195	1.328		0.863598	0.71009	0.786844		......SF.....	GSRPLSSFVQKAR	plas	RNA transport; RNA localization; mRNA transport; organic substance transport; protein transport; establishment of RNA localization; establishment of localization; transport; establishment of protein localization; nucleic acid transport; nucleobase-containing compound transport; localization; macromolecule localization; protein localization; nitrogen compound transport;	membrane; endoplasmic reticulum; nuclear outer membrane-endoplasmic reticulum membrane network; organelle membrane; cytoplasm; macromolecular complex; intrinsic to membrane; intracellular part; cell; organelle part; nuclear membrane; intracellular; membrane part; cell part; membrane-bounded organelle; endoplasmic reticulum membrane; intracellular organelle; nuclear pore; nuclear envelope; pore co…		K14316	POM121; nuclear pore complex protein Nup121	hsa03013 RNA transport - Homo sapiens (human);
A8CG34	95	S	Nuclear envelope pore membrane protein POM 121C	POM121C	0.833		0.899		1.195	1.328			0.676958	0.676958		......SP..K..	RRTLFASPPAKST	plas	RNA transport; RNA localization; mRNA transport; organic substance transport; protein transport; establishment of RNA localization; establishment of localization; transport; establishment of protein localization; nucleic acid transport; nucleobase-containing compound transport; localization; macromolecule localization; protein localization; nitrogen compound transport;	membrane; endoplasmic reticulum; nuclear outer membrane-endoplasmic reticulum membrane network; organelle membrane; cytoplasm; macromolecular complex; intrinsic to membrane; intracellular part; cell; organelle part; nuclear membrane; intracellular; membrane part; cell part; membrane-bounded organelle; endoplasmic reticulum membrane; intracellular organelle; nuclear pore; nuclear envelope; pore co…		K14316	POM121; nuclear pore complex protein Nup121	hsa03013 RNA transport - Homo sapiens (human);
A8CG34	246	S	Nuclear envelope pore membrane protein POM 121C	POM121C	1.417				1.195	1.328						......SP...R.	NSRMVCSPVTVRI	plas	RNA transport; RNA localization; mRNA transport; organic substance transport; protein transport; establishment of RNA localization; establishment of localization; transport; establishment of protein localization; nucleic acid transport; nucleobase-containing compound transport; localization; macromolecule localization; protein localization; nitrogen compound transport;	membrane; endoplasmic reticulum; nuclear outer membrane-endoplasmic reticulum membrane network; organelle membrane; cytoplasm; macromolecular complex; intrinsic to membrane; intracellular part; cell; organelle part; nuclear membrane; intracellular; membrane part; cell part; membrane-bounded organelle; endoplasmic reticulum membrane; intracellular organelle; nuclear pore; nuclear envelope; pore co…		K14316	POM121; nuclear pore complex protein Nup121	hsa03013 RNA transport - Homo sapiens (human);
A8CG34	291	S	Nuclear envelope pore membrane protein POM 121C	POM121C	1.488				1.195	1.328							AKETVLSALKEKK	plas	RNA transport; RNA localization; mRNA transport; organic substance transport; protein transport; establishment of RNA localization; establishment of localization; transport; establishment of protein localization; nucleic acid transport; nucleobase-containing compound transport; localization; macromolecule localization; protein localization; nitrogen compound transport;	membrane; endoplasmic reticulum; nuclear outer membrane-endoplasmic reticulum membrane network; organelle membrane; cytoplasm; macromolecular complex; intrinsic to membrane; intracellular part; cell; organelle part; nuclear membrane; intracellular; membrane part; cell part; membrane-bounded organelle; endoplasmic reticulum membrane; intracellular organelle; nuclear pore; nuclear envelope; pore co…		K14316	POM121; nuclear pore complex protein Nup121	hsa03013 RNA transport - Homo sapiens (human);
A8CG34	358	S	Nuclear envelope pore membrane protein POM 121C	POM121C	1.397				1.195	1.328						......SD.....	GLNSQSSDDHLNK	plas	RNA transport; RNA localization; mRNA transport; organic substance transport; protein transport; establishment of RNA localization; establishment of localization; transport; establishment of protein localization; nucleic acid transport; nucleobase-containing compound transport; localization; macromolecule localization; protein localization; nitrogen compound transport;	membrane; endoplasmic reticulum; nuclear outer membrane-endoplasmic reticulum membrane network; organelle membrane; cytoplasm; macromolecular complex; intrinsic to membrane; intracellular part; cell; organelle part; nuclear membrane; intracellular; membrane part; cell part; membrane-bounded organelle; endoplasmic reticulum membrane; intracellular organelle; nuclear pore; nuclear envelope; pore co…		K14316	POM121; nuclear pore complex protein Nup121	hsa03013 RNA transport - Homo sapiens (human);
A8CG34	674	S	Nuclear envelope pore membrane protein POM 121C	POM121C	7.514				1.195	1.328						......SP..K..	QATSAPSPAPKQS	plas	RNA transport; RNA localization; mRNA transport; organic substance transport; protein transport; establishment of RNA localization; establishment of localization; transport; establishment of protein localization; nucleic acid transport; nucleobase-containing compound transport; localization; macromolecule localization; protein localization; nitrogen compound transport;	membrane; endoplasmic reticulum; nuclear outer membrane-endoplasmic reticulum membrane network; organelle membrane; cytoplasm; macromolecular complex; intrinsic to membrane; intracellular part; cell; organelle part; nuclear membrane; intracellular; membrane part; cell part; membrane-bounded organelle; endoplasmic reticulum membrane; intracellular organelle; nuclear pore; nuclear envelope; pore co…		K14316	POM121; nuclear pore complex protein Nup121	hsa03013 RNA transport - Homo sapiens (human);
A8MPP1	204	S	Putative ATP-dependent RNA helicase DDX11-like protein 8	DDX11L8	1.069	0.941			0.773			1.21734		1.21734		......SD.E...	VLAEYESDEEKKV	cyto		intracellular organelle; intracellular non-membrane-bounded organelle; intracellular organelle part; nuclear lumen; intracellular part; nucleolus; cell; organelle part; non-membrane-bounded organelle; organelle; intracellular membrane-bounded organelle; membrane-enclosed lumen; nucleus; intracellular organelle lumen; cell part; intracellular; membrane-bounded organelle; organelle lumen; nuclear p…	nucleoside phosphate binding; ATP-dependent helicase activity; hydrolase activity, acting on acid anhydrides; hydrolase activity; ATPase activity; organic cyclic compound binding; heterocyclic compound binding; pyrophosphatase activity; catalytic activity; ribonucleotide binding; binding; ATP-dependent DNA helicase activity; purine ribonucleoside binding; anion binding; adenyl ribonucleotide bind…				IPR010614; IPR014013; IPR027417; IPR006554; IPR006555;	Helicase, superfamily 1/2, ATP-binding domain, DinG/Rad3-type; ATP-dependent helicase, C-terminal; Helicase-like, DEXD box c2 type; DEAD2; P-loop containing nucleoside triphosphate hydrolase;
A8MQ03	12	Y	UPF0574 protein C9orf169	C9orf169		0.846	0.913										#N/A	extr
A8MQ03	16	S	UPF0574 protein C9orf169	C9orf169	1.173	1.13	1.203									......S..R...	NPYAHISIPRAHL	extr
A8MT19	496	S	Putative rhophilin-2-like protein RHPN2P1	RHPN2P1	0.934	0.898											LLDSTSSMHNKSA	nucl							IPR001478; IPR004328;	PDZ domain; BRO1 domain;
A8MT19	536	S	Putative rhophilin-2-like protein RHPN2P1	RHPN2P1	0.908		0.96									...K..S......	KISKKLSFLSWGT	nucl							IPR001478; IPR004328;	PDZ domain; BRO1 domain;
A8MT19	539	S	Putative rhophilin-2-like protein RHPN2P1	RHPN2P1	1.752												KKLSFLSWGTNKN	nucl							IPR001478; IPR004328;	PDZ domain; BRO1 domain;
A8MW92	478	S	PHD finger protein 20-like protein 1	PHF20L1			2.407			1.349			1.78428	1.78428			CLPLDLSRGSEVT	nucl			cation binding; metal ion binding; zinc ion binding; transition metal ion binding; binding; ion binding;	K18402			IPR014002; IPR001965; IPR013083; IPR011011; IPR002999; IPR019787;	Zinc finger, PHD-type; Zinc finger, PHD-finger; Zinc finger, FYVE/PHD-type; Tudor domain; Zinc finger, RING/FYVE/PHD-type; Tudor-like, plant;
B2RTY4	755	S	Unconventional myosin-IXa	MYO9A												......SL.....	HPVHQRSLEILQR	nucl	single organism signaling; regulation of cellular process; single-multicellular organism process; visual perception; regulation of signaling; regulation of nucleobase-containing compound metabolic process; single-organism process; regulation of nucleoside metabolic process; regulation of nucleotide catabolic process; response to stimulus; neurological system process; signal transduction; regulati…	intracellular organelle; membrane; intracellular non-membrane-bounded organelle; cytoskeletal part; intracellular organelle part; cytoplasm; macromolecular complex; intrinsic to membrane; intracellular part; cytosol; cell; actin cytoskeleton; integral to membrane; organelle part; unconventional myosin complex; non-membrane-bounded organelle; cytoskeleton; organelle; intracellular; cell part; memb…	ATP binding; motor activity; nucleoside phosphate binding; nucleoside-triphosphatase regulator activity; GTPase regulator activity; nucleoside binding; ion binding; hydrolase activity, acting on acid anhydrides; hydrolase activity; nucleotide binding; nucleoside-triphosphatase activity; organic cyclic compound binding; heterocyclic compound binding; ribonucleoside binding; pyrophosphatase activit…	K10360			IPR002219; IPR001609; IPR027417; IPR008936; IPR000159; IPR000198;	Ras-association; Protein kinase C-like, phorbol ester/diacylglycerol binding; Rho GTPase activation protein; Myosin head, motor domain; Rho GTPase-activating protein domain; P-loop containing nucleoside triphosphate hydrolase;
B2RTY4	1299	S	Unconventional myosin-IXa	MYO9A		0.785										......SP...R.	RSLGGISPSEDRR	nucl	single organism signaling; regulation of cellular process; single-multicellular organism process; visual perception; regulation of signaling; regulation of nucleobase-containing compound metabolic process; single-organism process; regulation of nucleoside metabolic process; regulation of nucleotide catabolic process; response to stimulus; neurological system process; signal transduction; regulati…	intracellular organelle; membrane; intracellular non-membrane-bounded organelle; cytoskeletal part; intracellular organelle part; cytoplasm; macromolecular complex; intrinsic to membrane; intracellular part; cytosol; cell; actin cytoskeleton; integral to membrane; organelle part; unconventional myosin complex; non-membrane-bounded organelle; cytoskeleton; organelle; intracellular; cell part; memb…	ATP binding; motor activity; nucleoside phosphate binding; nucleoside-triphosphatase regulator activity; GTPase regulator activity; nucleoside binding; ion binding; hydrolase activity, acting on acid anhydrides; hydrolase activity; nucleotide binding; nucleoside-triphosphatase activity; organic cyclic compound binding; heterocyclic compound binding; ribonucleoside binding; pyrophosphatase activit…	K10360			IPR002219; IPR001609; IPR027417; IPR008936; IPR000159; IPR000198;	Ras-association; Protein kinase C-like, phorbol ester/diacylglycerol binding; Rho GTPase activation protein; Myosin head, motor domain; Rho GTPase-activating protein domain; P-loop containing nucleoside triphosphate hydrolase;
B7ZBB8	86	S	Protein phosphatase 1 regulatory subunit 3G	PPP1R3G		6.242										...RS.S......	CRARSFSLPADPI	cyto	regulation of cellular process; regulation of generation of precursor metabolites and energy; positive regulation of carbohydrate metabolic process; regulation of carbohydrate biosynthetic process; regulation of biological quality; regulation of polysaccharide biosynthetic process; regulation of macromolecule metabolic process; glucose homeostasis; positive regulation of biosynthetic process; reg…	intracellular part; cell; cell part; intracellular; cytoplasm;	carbohydrate binding; polysaccharide binding; pattern binding; glycogen binding; binding;				IPR005036;	Putative phosphatase regulatory subunit;
C9J202	17	S	Putative glycosyltransferase ALG1L2	ALG1L2			0.763									...K..S......	VYDKPASFFKEAP	mito			transferase activity, transferring glycosyl groups; catalytic activity; transferase activity;
C9JLW8	21	S	Protein FAM195B	FAM195B	1.31	1.47	1.391			1.328			1.04744	1.04744		....P.SP.....	RTSSPRSPPSSSE	nucl
E9PRG8	65	S	Uncharacterized protein C11orf98	LOC102288414	1.353	1.314		0.978	0.892		1.38344	1.47309		1.42826			#N/A
O00116	65	S	Alkyldihydroxyacetonephosphate synthase, peroxisomal	AGPS	0.995	0.777	0.943	1.037	1.031	1.054	0.959499	0.753637	0.894687	0.869274	0.240336	...R..S......	KARRAASAATAAP	cyto	ether lipid biosynthetic process; small molecule metabolic process; ether lipid metabolic process; ether metabolic process; biosynthetic process; cellular lipid metabolic process; primary metabolic process; organic substance biosynthetic process; cellular metabolic process; organic substance metabolic process; lipid biosynthetic process; metabolic process; single-organism metabolic process; ether…	membrane; microbody membrane; intracellular organelle; peroxisomal part; organelle membrane; peroxisome; intracellular organelle part; cytoplasm; microbody part; intracellular part; cell; organelle part; mitochondrion; peroxisomal membrane; membrane-enclosed lumen; intracellular membrane-bounded organelle; organelle; microbody lumen; intracellular organelle lumen; peroxisomal matrix; intracellula…	UDP-N-acetylmuramate dehydrogenase activity; nucleoside phosphate binding; flavin adenine dinucleotide binding; ion binding; nucleotide binding; cofactor binding; oxidoreductase activity; FAD binding; oxidoreductase activity, acting on CH-OH group of donors; heterocyclic compound binding; organic cyclic compound binding; oxidoreductase activity, acting on the CH-OH group of donors, NAD or NADP as…	K00803	E2.5.1.26; alkyldihydroxyacetonephosphate synthase [EC:2.5.1.26]	hsa01100 Metabolic pathways - Homo sapiens (human); hsa00565 Ether lipid metabolism - Homo sapiens (human); hsa04146 Peroxisome - Homo sapiens (human);	IPR016166; IPR004113; IPR016169; IPR016164; IPR006094; IPR016167;	FAD-linked oxidase-like, C-terminal; CO dehydrogenase flavoprotein-like, FAD-binding, subdomain 2; FAD-linked oxidase, C-terminal; FAD linked oxidase, N-terminal; FAD-binding, type 2; FAD-binding, type 2, subdomain 1;	AGPS-GNPAT complex;
O00116	387	Y	Alkyldihydroxyacetonephosphate synthase, peroxisomal	AGPS	1.24	1.163	1.075	1.037	1.031	1.054	1.19576	1.12803	1.01992	1.11457	0.202594		#N/A	cyto	ether lipid biosynthetic process; small molecule metabolic process; ether lipid metabolic process; ether metabolic process; biosynthetic process; cellular lipid metabolic process; primary metabolic process; organic substance biosynthetic process; cellular metabolic process; organic substance metabolic process; lipid biosynthetic process; metabolic process; single-organism metabolic process; ether…	membrane; microbody membrane; intracellular organelle; peroxisomal part; organelle membrane; peroxisome; intracellular organelle part; cytoplasm; microbody part; intracellular part; cell; organelle part; mitochondrion; peroxisomal membrane; membrane-enclosed lumen; intracellular membrane-bounded organelle; organelle; microbody lumen; intracellular organelle lumen; peroxisomal matrix; intracellula…	UDP-N-acetylmuramate dehydrogenase activity; nucleoside phosphate binding; flavin adenine dinucleotide binding; ion binding; nucleotide binding; cofactor binding; oxidoreductase activity; FAD binding; oxidoreductase activity, acting on CH-OH group of donors; heterocyclic compound binding; organic cyclic compound binding; oxidoreductase activity, acting on the CH-OH group of donors, NAD or NADP as…	K00803	E2.5.1.26; alkyldihydroxyacetonephosphate synthase [EC:2.5.1.26]	hsa01100 Metabolic pathways - Homo sapiens (human); hsa00565 Ether lipid metabolism - Homo sapiens (human); hsa04146 Peroxisome - Homo sapiens (human);	IPR016166; IPR004113; IPR016169; IPR016164; IPR006094; IPR016167;	FAD-linked oxidase-like, C-terminal; CO dehydrogenase flavoprotein-like, FAD-binding, subdomain 2; FAD-linked oxidase, C-terminal; FAD linked oxidase, N-terminal; FAD-binding, type 2; FAD-binding, type 2, subdomain 1;	AGPS-GNPAT complex;
O00116	589	S	Alkyldihydroxyacetonephosphate synthase, peroxisomal	AGPS	1.183	1.3	1.252	1.037	1.031	1.054	1.14079	1.26091	1.18786	1.19652	0.0375487	...R..S......	FNYRGISDPLTVF	cyto	ether lipid biosynthetic process; small molecule metabolic process; ether lipid metabolic process; ether metabolic process; biosynthetic process; cellular lipid metabolic process; primary metabolic process; organic substance biosynthetic process; cellular metabolic process; organic substance metabolic process; lipid biosynthetic process; metabolic process; single-organism metabolic process; ether…	membrane; microbody membrane; intracellular organelle; peroxisomal part; organelle membrane; peroxisome; intracellular organelle part; cytoplasm; microbody part; intracellular part; cell; organelle part; mitochondrion; peroxisomal membrane; membrane-enclosed lumen; intracellular membrane-bounded organelle; organelle; microbody lumen; intracellular organelle lumen; peroxisomal matrix; intracellula…	UDP-N-acetylmuramate dehydrogenase activity; nucleoside phosphate binding; flavin adenine dinucleotide binding; ion binding; nucleotide binding; cofactor binding; oxidoreductase activity; FAD binding; oxidoreductase activity, acting on CH-OH group of donors; heterocyclic compound binding; organic cyclic compound binding; oxidoreductase activity, acting on the CH-OH group of donors, NAD or NADP as…	K00803	E2.5.1.26; alkyldihydroxyacetonephosphate synthase [EC:2.5.1.26]	hsa01100 Metabolic pathways - Homo sapiens (human); hsa00565 Ether lipid metabolism - Homo sapiens (human); hsa04146 Peroxisome - Homo sapiens (human);	IPR016166; IPR004113; IPR016169; IPR016164; IPR006094; IPR016167;	FAD-linked oxidase-like, C-terminal; CO dehydrogenase flavoprotein-like, FAD-binding, subdomain 2; FAD-linked oxidase, C-terminal; FAD linked oxidase, N-terminal; FAD-binding, type 2; FAD-binding, type 2, subdomain 1;	AGPS-GNPAT complex;
O00139	97	T	Kinesin-like protein KIF2A	KIF2A				0.916	0.896	0.859							IVKNRRTVASIKN	cyto_nucl	cellular component organization; single-multicellular organism process; blood coagulation; regulation of biological quality; cellular developmental process; spindle organization; single-organism process; response to stimulus; hemostasis; response to wounding; cell differentiation; mitotic prometaphase; multicellular organismal development; mitotic spindle organization; cytoskeleton organization; …	intracellular organelle; spindle pole; microtubule; intracellular non-membrane-bounded organelle; cytoskeletal part; cytoplasm; intracellular organelle part; macromolecular complex; intracellular part; microtubule associated complex; cytosol; cell; spindle; organelle part; non-membrane-bounded organelle; organelle; cytoskeleton; microtubule organizing center; microtubule cytoskeleton; centrosome;…	ATP binding; motor activity; nucleoside phosphate binding; nucleoside binding; ion binding; hydrolase activity, acting on acid anhydrides; hydrolase activity; nucleotide binding; nucleoside-triphosphatase activity; organic cyclic compound binding; heterocyclic compound binding; ribonucleoside binding; pyrophosphatase activity; catalytic activity; ribonucleotide binding; binding; purine ribonucleo…	K10393			IPR027417; IPR001752;	Kinesin, motor domain; P-loop containing nucleoside triphosphate hydrolase;
O00139	100	S	Kinesin-like protein KIF2A	KIF2A	1.488	1.454	1.439	0.916	0.896	0.859	1.62445	1.62277	1.6752	1.64081	0.000665302	.R....S......	NRRTVASIKNDPP	cyto_nucl	cellular component organization; single-multicellular organism process; blood coagulation; regulation of biological quality; cellular developmental process; spindle organization; single-organism process; response to stimulus; hemostasis; response to wounding; cell differentiation; mitotic prometaphase; multicellular organismal development; mitotic spindle organization; cytoskeleton organization; …	intracellular organelle; spindle pole; microtubule; intracellular non-membrane-bounded organelle; cytoskeletal part; cytoplasm; intracellular organelle part; macromolecular complex; intracellular part; microtubule associated complex; cytosol; cell; spindle; organelle part; non-membrane-bounded organelle; organelle; cytoskeleton; microtubule organizing center; microtubule cytoskeleton; centrosome;…	ATP binding; motor activity; nucleoside phosphate binding; nucleoside binding; ion binding; hydrolase activity, acting on acid anhydrides; hydrolase activity; nucleotide binding; nucleoside-triphosphatase activity; organic cyclic compound binding; heterocyclic compound binding; ribonucleoside binding; pyrophosphatase activity; catalytic activity; ribonucleotide binding; binding; purine ribonucleo…	K10393			IPR027417; IPR001752;	Kinesin, motor domain; P-loop containing nucleoside triphosphate hydrolase;
O00139	484	S	Kinesin-like protein KIF2A	KIF2A		1.777	1.377	0.916	0.896	0.859		1.98326	1.60303	1.79314		......SL.....	GAEINKSLLALKE	cyto_nucl	cellular component organization; single-multicellular organism process; blood coagulation; regulation of biological quality; cellular developmental process; spindle organization; single-organism process; response to stimulus; hemostasis; response to wounding; cell differentiation; mitotic prometaphase; multicellular organismal development; mitotic spindle organization; cytoskeleton organization; …	intracellular organelle; spindle pole; microtubule; intracellular non-membrane-bounded organelle; cytoskeletal part; cytoplasm; intracellular organelle part; macromolecular complex; intracellular part; microtubule associated complex; cytosol; cell; spindle; organelle part; non-membrane-bounded organelle; organelle; cytoskeleton; microtubule organizing center; microtubule cytoskeleton; centrosome;…	ATP binding; motor activity; nucleoside phosphate binding; nucleoside binding; ion binding; hydrolase activity, acting on acid anhydrides; hydrolase activity; nucleotide binding; nucleoside-triphosphatase activity; organic cyclic compound binding; heterocyclic compound binding; ribonucleoside binding; pyrophosphatase activity; catalytic activity; ribonucleotide binding; binding; purine ribonucleo…	K10393			IPR027417; IPR001752;	Kinesin, motor domain; P-loop containing nucleoside triphosphate hydrolase;
O00148	37	S	ATP-dependent RNA helicase DDX39A	DDX39A				0.886	0.887	0.843						.....GS......	KKDIKGSYVSIHS	cyto	RNA transport; intracellular transport; cellular aromatic compound metabolic process; mRNA transport; single-organism process; nuclear export; nuclear transport; cellular metabolic process; establishment of RNA localization; organic substance metabolic process; establishment of localization; metabolic process; mRNA splicing, via spliceosome; RNA splicing, via transesterification reactions with bu…	organelle; intracellular membrane-bounded organelle; intracellular organelle; nucleus; cell part; intracellular; cytoplasm; intracellular part; membrane-bounded organelle; cell;	nucleoside phosphate binding; ATP-dependent helicase activity; hydrolase activity, acting on acid anhydrides; hydrolase activity; ATPase activity; organic cyclic compound binding; heterocyclic compound binding; pyrophosphatase activity; catalytic activity; ribonucleotide binding; binding; purine ribonucleoside binding; anion binding; adenyl ribonucleotide binding; adenyl nucleotide binding; hydro…	K13182			IPR014014; IPR011545; IPR014001; IPR027417; IPR001650;	Helicase, C-terminal; Helicase, superfamily 1/2, ATP-binding domain; RNA helicase, DEAD-box type, Q motif; DNA/RNA helicase, DEAD/DEAH box type, N-terminal; P-loop containing nucleoside triphosphate hydrolase;	Emerin complex 52;
O00148	38	Y	ATP-dependent RNA helicase DDX39A	DDX39A	0.906	0.787	0.865	0.886	0.887	0.843	1.02257	0.88726	1.0261	0.978644	0.723767		#N/A	cyto	RNA transport; intracellular transport; cellular aromatic compound metabolic process; mRNA transport; single-organism process; nuclear export; nuclear transport; cellular metabolic process; establishment of RNA localization; organic substance metabolic process; establishment of localization; metabolic process; mRNA splicing, via spliceosome; RNA splicing, via transesterification reactions with bu…	organelle; intracellular membrane-bounded organelle; intracellular organelle; nucleus; cell part; intracellular; cytoplasm; intracellular part; membrane-bounded organelle; cell;	nucleoside phosphate binding; ATP-dependent helicase activity; hydrolase activity, acting on acid anhydrides; hydrolase activity; ATPase activity; organic cyclic compound binding; heterocyclic compound binding; pyrophosphatase activity; catalytic activity; ribonucleotide binding; binding; purine ribonucleoside binding; anion binding; adenyl ribonucleotide binding; adenyl nucleotide binding; hydro…	K13182			IPR014014; IPR011545; IPR014001; IPR027417; IPR001650;	Helicase, C-terminal; Helicase, superfamily 1/2, ATP-binding domain; RNA helicase, DEAD-box type, Q motif; DNA/RNA helicase, DEAD/DEAH box type, N-terminal; P-loop containing nucleoside triphosphate hydrolase;	Emerin complex 52;
O00148	40	S	ATP-dependent RNA helicase DDX39A	DDX39A	0.979	0.733	0.588	0.886	0.887	0.843	1.10497	0.826381	0.697509	0.876285	0.457186		IKGSYVSIHSSGF	cyto	RNA transport; intracellular transport; cellular aromatic compound metabolic process; mRNA transport; single-organism process; nuclear export; nuclear transport; cellular metabolic process; establishment of RNA localization; organic substance metabolic process; establishment of localization; metabolic process; mRNA splicing, via spliceosome; RNA splicing, via transesterification reactions with bu…	organelle; intracellular membrane-bounded organelle; intracellular organelle; nucleus; cell part; intracellular; cytoplasm; intracellular part; membrane-bounded organelle; cell;	nucleoside phosphate binding; ATP-dependent helicase activity; hydrolase activity, acting on acid anhydrides; hydrolase activity; ATPase activity; organic cyclic compound binding; heterocyclic compound binding; pyrophosphatase activity; catalytic activity; ribonucleotide binding; binding; purine ribonucleoside binding; anion binding; adenyl ribonucleotide binding; adenyl nucleotide binding; hydro…	K13182			IPR014014; IPR011545; IPR014001; IPR027417; IPR001650;	Helicase, C-terminal; Helicase, superfamily 1/2, ATP-binding domain; RNA helicase, DEAD-box type, Q motif; DNA/RNA helicase, DEAD/DEAH box type, N-terminal; P-loop containing nucleoside triphosphate hydrolase;	Emerin complex 52;
O00148	171	T	ATP-dependent RNA helicase DDX39A	DDX39A	0.743	0.788	0.795	0.886	0.887	0.843	0.8386	0.888388	0.94306	0.890016	0.105174	......TP.....	PHVVVGTPGRILA	cyto	RNA transport; intracellular transport; cellular aromatic compound metabolic process; mRNA transport; single-organism process; nuclear export; nuclear transport; cellular metabolic process; establishment of RNA localization; organic substance metabolic process; establishment of localization; metabolic process; mRNA splicing, via spliceosome; RNA splicing, via transesterification reactions with bu…	organelle; intracellular membrane-bounded organelle; intracellular organelle; nucleus; cell part; intracellular; cytoplasm; intracellular part; membrane-bounded organelle; cell;	nucleoside phosphate binding; ATP-dependent helicase activity; hydrolase activity, acting on acid anhydrides; hydrolase activity; ATPase activity; organic cyclic compound binding; heterocyclic compound binding; pyrophosphatase activity; catalytic activity; ribonucleotide binding; binding; purine ribonucleoside binding; anion binding; adenyl ribonucleotide binding; adenyl nucleotide binding; hydro…	K13182			IPR014014; IPR011545; IPR014001; IPR027417; IPR001650;	Helicase, C-terminal; Helicase, superfamily 1/2, ATP-binding domain; RNA helicase, DEAD-box type, Q motif; DNA/RNA helicase, DEAD/DEAH box type, N-terminal; P-loop containing nucleoside triphosphate hydrolase;	Emerin complex 52;
O00148	183	S	ATP-dependent RNA helicase DDX39A	DDX39A	0.509			0.886	0.887	0.843	0.574492			0.574492		...R..S......	ALVRNRSFSLKNV	cyto	RNA transport; intracellular transport; cellular aromatic compound metabolic process; mRNA transport; single-organism process; nuclear export; nuclear transport; cellular metabolic process; establishment of RNA localization; organic substance metabolic process; establishment of localization; metabolic process; mRNA splicing, via spliceosome; RNA splicing, via transesterification reactions with bu…	organelle; intracellular membrane-bounded organelle; intracellular organelle; nucleus; cell part; intracellular; cytoplasm; intracellular part; membrane-bounded organelle; cell;	nucleoside phosphate binding; ATP-dependent helicase activity; hydrolase activity, acting on acid anhydrides; hydrolase activity; ATPase activity; organic cyclic compound binding; heterocyclic compound binding; pyrophosphatase activity; catalytic activity; ribonucleotide binding; binding; purine ribonucleoside binding; anion binding; adenyl ribonucleotide binding; adenyl nucleotide binding; hydro…	K13182			IPR014014; IPR011545; IPR014001; IPR027417; IPR001650;	Helicase, C-terminal; Helicase, superfamily 1/2, ATP-binding domain; RNA helicase, DEAD-box type, Q motif; DNA/RNA helicase, DEAD/DEAH box type, N-terminal; P-loop containing nucleoside triphosphate hydrolase;	Emerin complex 52;
O00151	90	S	PDZ and LIM domain protein 1	PDLIM1	1.413	1.2	1.312	1.088	1.038	1.076	1.29871	1.15607	1.21933	1.2247	0.0393013	......SP.....	SEHKVWSPLVTEE	cyto	regulation of cellular process; regulation of gene expression; regulation of transcription, DNA-dependent; response to stress; regulation of cellular biosynthetic process; regulation of primary metabolic process; response to abiotic stimulus; regulation of macromolecule metabolic process; regulation of nucleobase-containing compound metabolic process; regulation of macromolecule biosynthetic proc…	cytoskeleton; organelle; intracellular organelle; intracellular non-membrane-bounded organelle; cell part; intracellular; cytoplasm; macromolecular complex; intracellular part; protein complex; transcription factor complex; cell; non-membrane-bounded organelle;	transition metal ion binding; binding; ion binding; transcription factor binding transcription factor activity; metal ion binding; cation binding; transcription coactivator activity; zinc ion binding; transcription cofactor activity; protein binding transcription factor activity;				IPR001781; IPR006643; IPR001478;	PDZ domain; ZASP; Zinc finger, LIM-type;
O00151	130	S	PDZ and LIM domain protein 1	PDLIM1	1.762	1.611		1.088	1.038	1.076	1.61949	1.55202		1.58575		......SP.....	AMPFTASPASSTT	cyto	regulation of cellular process; regulation of gene expression; regulation of transcription, DNA-dependent; response to stress; regulation of cellular biosynthetic process; regulation of primary metabolic process; response to abiotic stimulus; regulation of macromolecule metabolic process; regulation of nucleobase-containing compound metabolic process; regulation of macromolecule biosynthetic proc…	cytoskeleton; organelle; intracellular organelle; intracellular non-membrane-bounded organelle; cell part; intracellular; cytoplasm; macromolecular complex; intracellular part; protein complex; transcription factor complex; cell; non-membrane-bounded organelle;	transition metal ion binding; binding; ion binding; transcription factor binding transcription factor activity; metal ion binding; cation binding; transcription coactivator activity; zinc ion binding; transcription cofactor activity; protein binding transcription factor activity;				IPR001781; IPR006643; IPR001478;	PDZ domain; ZASP; Zinc finger, LIM-type;
O00159	408	S	Unconventional myosin-Ic	MYO1C	0.93	1.033	0.996	1.133	1.119	1.115	0.82083	0.923146	0.893274	0.879083	0.0935294	..K...SP.....	ASKDVESPSWRST	cyto	single organism signaling; RNA transport; positive regulation of cell migration; cell surface receptor signaling pathway; positive regulation of locomotion; regulation of signaling; single-organism process; cellular response to growth factor stimulus; protein transport; establishment of localization; protein targeting; protein targeting to membrane; signal transduction; establishment of localizat…	membrane; basolateral plasma membrane; extracellular region part; brush border; membrane-bounded vesicle; cell periphery; vesicle; cytoplasm; intrinsic to membrane; macromolecular complex; intracellular part; cell; organelle part; non-membrane-bounded organelle; membrane-enclosed lumen; cytoskeleton; extracellular vesicular exosome; nucleoplasm; intracellular organelle lumen; cell part; membrane …	ATP binding; motor activity; nucleoside phosphate binding; nucleoside binding; ion binding; hydrolase activity, acting on acid anhydrides; hydrolase activity; nucleotide binding; nucleoside-triphosphatase activity; organic cyclic compound binding; heterocyclic compound binding; ribonucleoside binding; pyrophosphatase activity; catalytic activity; ribonucleotide binding; binding; purine ribonucleo…	K10356			IPR010926; IPR001609; IPR027417;	Myosin head, motor domain; Myosin tail 2; P-loop containing nucleoside triphosphate hydrolase;
O00159	864	S	Unconventional myosin-Ic	MYO1C	1.203	1.128	1.186	1.133	1.119	1.115	1.06178	1.00804	1.06368	1.0445	0.18302	...RS.SP.....	KYCRSISPEWKQQ	cyto	single organism signaling; RNA transport; positive regulation of cell migration; cell surface receptor signaling pathway; positive regulation of locomotion; regulation of signaling; single-organism process; cellular response to growth factor stimulus; protein transport; establishment of localization; protein targeting; protein targeting to membrane; signal transduction; establishment of localizat…	membrane; basolateral plasma membrane; extracellular region part; brush border; membrane-bounded vesicle; cell periphery; vesicle; cytoplasm; intrinsic to membrane; macromolecular complex; intracellular part; cell; organelle part; non-membrane-bounded organelle; membrane-enclosed lumen; cytoskeleton; extracellular vesicular exosome; nucleoplasm; intracellular organelle lumen; cell part; membrane …	ATP binding; motor activity; nucleoside phosphate binding; nucleoside binding; ion binding; hydrolase activity, acting on acid anhydrides; hydrolase activity; nucleotide binding; nucleoside-triphosphatase activity; organic cyclic compound binding; heterocyclic compound binding; ribonucleoside binding; pyrophosphatase activity; catalytic activity; ribonucleotide binding; binding; purine ribonucleo…	K10356			IPR010926; IPR001609; IPR027417;	Myosin head, motor domain; Myosin tail 2; P-loop containing nucleoside triphosphate hydrolase;
O00161	5	S	Synaptosomal-associated protein 23	SNAP23		1.026		1.07	1.112	1.213		0.922662		0.922662			--MDNLSSEEIQQ	cyto	organelle localization; establishment of vesicle localization; intracellular transport; cellular component organization; vesicle-mediated transport; single-organism cellular process; Golgi vesicle transport; single-organism process; membrane fusion; organic substance transport; vesicle targeting; establishment of organelle localization; protein transport; establishment of localization; cellular l…	membrane; cytoplasmic vesicle; cell periphery; cell junction; membrane-bounded vesicle; cytoplasmic membrane-bounded vesicle; cytoplasm; vesicle; intracellular part; cell; cell part; intracellular; lysosome; neuron projection; secretory granule; membrane-bounded organelle; neuron part; lytic vacuole; intracellular organelle; cell projection; plasma membrane; synapse; azurophil granule; intracellu…		K08508	SNAP23; synaptosomal-associated protein 23	hsa04611 Platelet activation - Homo sapiens (human); hsa04130 SNARE interactions in vesicular transport - Homo sapiens (human);	IPR000928; IPR000727;	SNAP-25; Target SNARE coiled-coil domain;	SNARE complex;
O00161	110	S	Synaptosomal-associated protein 23	SNAP23	1.19	1.207	1.15	1.07	1.112	1.213	1.11215	1.08543	0.948063	1.04855	0.536572	...G..SP.....	GDGGENSPCNVVS	cyto	organelle localization; establishment of vesicle localization; intracellular transport; cellular component organization; vesicle-mediated transport; single-organism cellular process; Golgi vesicle transport; single-organism process; membrane fusion; organic substance transport; vesicle targeting; establishment of organelle localization; protein transport; establishment of localization; cellular l…	membrane; cytoplasmic vesicle; cell periphery; cell junction; membrane-bounded vesicle; cytoplasmic membrane-bounded vesicle; cytoplasm; vesicle; intracellular part; cell; cell part; intracellular; lysosome; neuron projection; secretory granule; membrane-bounded organelle; neuron part; lytic vacuole; intracellular organelle; cell projection; plasma membrane; synapse; azurophil granule; intracellu…		K08508	SNAP23; synaptosomal-associated protein 23	hsa04611 Platelet activation - Homo sapiens (human); hsa04130 SNARE interactions in vesicular transport - Homo sapiens (human);	IPR000928; IPR000727;	SNAP-25; Target SNARE coiled-coil domain;	SNARE complex;
O00161	161	S	Synaptosomal-associated protein 23	SNAP23		1.198	1.217	1.07	1.112	1.213		1.07734	1.0033	1.04032		.....GS......	NLTQVGSILGNLK	cyto	organelle localization; establishment of vesicle localization; intracellular transport; cellular component organization; vesicle-mediated transport; single-organism cellular process; Golgi vesicle transport; single-organism process; membrane fusion; organic substance transport; vesicle targeting; establishment of organelle localization; protein transport; establishment of localization; cellular l…	membrane; cytoplasmic vesicle; cell periphery; cell junction; membrane-bounded vesicle; cytoplasmic membrane-bounded vesicle; cytoplasm; vesicle; intracellular part; cell; cell part; intracellular; lysosome; neuron projection; secretory granule; membrane-bounded organelle; neuron part; lytic vacuole; intracellular organelle; cell projection; plasma membrane; synapse; azurophil granule; intracellu…		K08508	SNAP23; synaptosomal-associated protein 23	hsa04611 Platelet activation - Homo sapiens (human); hsa04130 SNARE interactions in vesicular transport - Homo sapiens (human);	IPR000928; IPR000727;	SNAP-25; Target SNARE coiled-coil domain;	SNARE complex;
O00178	24	S	GTP-binding protein 1	GTPBP1			1.211	1.02	0.961	0.971			1.24717	1.24717			MFAPEPSSPGAAR	cyto	single organism signaling; regulation of cellular process; regulation of macromolecule metabolic process; positive regulation of cellular catabolic process; regulation of nucleobase-containing compound metabolic process; single-organism process; response to stimulus; signal transduction; cell communication; positive regulation of mRNA catabolic process; positive regulation of metabolic process; p…	cell part; intracellular; cytoplasm; macromolecular complex; intracellular part; cytosol; cell; cytoplasmic exosome (RNase complex); protein complex; cytoplasmic part; exosome (RNase complex);	nucleoside phosphate binding; nucleoside binding; ion binding; hydrolase activity, acting on acid anhydrides; hydrolase activity; nucleotide binding; nucleoside-triphosphatase activity; organic cyclic compound binding; heterocyclic compound binding; ribonucleoside binding; pyrophosphatase activity; catalytic activity; ribonucleotide binding; binding; GTPase activity; purine ribonucleoside binding…				IPR004160; IPR004161; IPR009001; IPR027417; IPR000795; IPR009000;	Elongation factor, GTP-binding domain; Translation protein, beta-barrel domain; Translation elongation factor EFTu/EF1A, C-terminal; Translation elongation factor EF1A/initiation factor IF2gamma, C-terminal; Translation elongation factor EFTu/EF1A, domain 2; P-loop containing nucleoside triphosphate hydrolase;
O00178	25	S	GTP-binding protein 1	GTPBP1			1.175	1.02	0.961	0.971			1.21009	1.21009		....P.SP.....	FAPEPSSPGAARA	cyto	single organism signaling; regulation of cellular process; regulation of macromolecule metabolic process; positive regulation of cellular catabolic process; regulation of nucleobase-containing compound metabolic process; single-organism process; response to stimulus; signal transduction; cell communication; positive regulation of mRNA catabolic process; positive regulation of metabolic process; p…	cell part; intracellular; cytoplasm; macromolecular complex; intracellular part; cytosol; cell; cytoplasmic exosome (RNase complex); protein complex; cytoplasmic part; exosome (RNase complex);	nucleoside phosphate binding; nucleoside binding; ion binding; hydrolase activity, acting on acid anhydrides; hydrolase activity; nucleotide binding; nucleoside-triphosphatase activity; organic cyclic compound binding; heterocyclic compound binding; ribonucleoside binding; pyrophosphatase activity; catalytic activity; ribonucleotide binding; binding; GTPase activity; purine ribonucleoside binding…				IPR004160; IPR004161; IPR009001; IPR027417; IPR000795; IPR009000;	Elongation factor, GTP-binding domain; Translation protein, beta-barrel domain; Translation elongation factor EFTu/EF1A, C-terminal; Translation elongation factor EF1A/initiation factor IF2gamma, C-terminal; Translation elongation factor EFTu/EF1A, domain 2; P-loop containing nucleoside triphosphate hydrolase;
O00178	580	S	GTP-binding protein 1	GTPBP1		1.292		1.02	0.961	0.971		1.34443		1.34443		......SP...K.	LQTTNNSPMNSKP	cyto	single organism signaling; regulation of cellular process; regulation of macromolecule metabolic process; positive regulation of cellular catabolic process; regulation of nucleobase-containing compound metabolic process; single-organism process; response to stimulus; signal transduction; cell communication; positive regulation of mRNA catabolic process; positive regulation of metabolic process; p…	cell part; intracellular; cytoplasm; macromolecular complex; intracellular part; cytosol; cell; cytoplasmic exosome (RNase complex); protein complex; cytoplasmic part; exosome (RNase complex);	nucleoside phosphate binding; nucleoside binding; ion binding; hydrolase activity, acting on acid anhydrides; hydrolase activity; nucleotide binding; nucleoside-triphosphatase activity; organic cyclic compound binding; heterocyclic compound binding; ribonucleoside binding; pyrophosphatase activity; catalytic activity; ribonucleotide binding; binding; GTPase activity; purine ribonucleoside binding…				IPR004160; IPR004161; IPR009001; IPR027417; IPR000795; IPR009000;	Elongation factor, GTP-binding domain; Translation protein, beta-barrel domain; Translation elongation factor EFTu/EF1A, C-terminal; Translation elongation factor EF1A/initiation factor IF2gamma, C-terminal; Translation elongation factor EFTu/EF1A, domain 2; P-loop containing nucleoside triphosphate hydrolase;
O00192	642	T	Armadillo repeat protein deleted in velo-cardio-facial syndrome	ARVCF		1.669	1.574										MDRNFDTLDLPKR	nucl	developmental process; single-multicellular organism process; biological adhesion; single-organism cellular process; single-organism process; cell adhesion; multicellular organismal development; multicellular organismal process; cellular process;	membrane; organelle; intracellular membrane-bounded organelle; intracellular organelle; nucleus; cell periphery; cell part; intracellular; cytoplasm; intracellular part; membrane-bounded organelle; cell; plasma membrane;					IPR011989; IPR016024;	Armadillo-type fold; Armadillo-like helical;
O00193	17	S	Small acidic protein	SMAP	0.954	0.961	0.938	0.988	0.976	0.959	0.965587	0.984631	0.978102	0.976107	0.0747586	...RS.SP.....	GVKRSASPDDDLG	nucl
O00203	276	S	AP-3 complex subunit beta-1	AP3B1	0.877	0.912	0.847	1.017	0.982	0.95	0.86234	0.928717	0.891579	0.894212	0.0505972	......SD.....	GKNFYESDDDQKE	cyto	regulation of T cell activation; single organism signaling; regulation of leukocyte activation; blood coagulation; regulation of biological quality; establishment of protein localization to organelle; single-organism process; protein targeting to vacuole; regulation of lymphocyte activation; positive regulation of alpha-beta T cell activation; protein transport; neurological system process; estab…	membrane; AP-type membrane coat adaptor complex; organelle membrane; cytoplasmic vesicle; membrane-bounded vesicle; cytoplasmic membrane-bounded vesicle; vesicle; cytoplasm; cytoplasmic vesicle part; macromolecular complex; intracellular part; cell; organelle part; coated vesicle membrane; AP-3 adaptor complex; clathrin-coated vesicle; intracellular; cell part; membrane part; membrane-bounded org…		K12397	AP3B; AP-3 complex subunit beta	hsa04142 Lysosome - Homo sapiens (human);	IPR011989; IPR016024; IPR002553;	Clathrin/coatomer adaptor, adaptin-like, N-terminal; Armadillo-type fold; Armadillo-like helical;	AP3 adapter complex; AP3-BLOC1 complex;
O00203	609	S	AP-3 complex subunit beta-1	AP3B1	1.263	1.281	1.247	1.017	0.982	0.95	1.24189	1.30448	1.31263	1.28633	0.00720237	......SP.K...	PAPLLESPFKDRD	cyto	regulation of T cell activation; single organism signaling; regulation of leukocyte activation; blood coagulation; regulation of biological quality; establishment of protein localization to organelle; single-organism process; protein targeting to vacuole; regulation of lymphocyte activation; positive regulation of alpha-beta T cell activation; protein transport; neurological system process; estab…	membrane; AP-type membrane coat adaptor complex; organelle membrane; cytoplasmic vesicle; membrane-bounded vesicle; cytoplasmic membrane-bounded vesicle; vesicle; cytoplasm; cytoplasmic vesicle part; macromolecular complex; intracellular part; cell; organelle part; coated vesicle membrane; AP-3 adaptor complex; clathrin-coated vesicle; intracellular; cell part; membrane part; membrane-bounded org…		K12397	AP3B; AP-3 complex subunit beta	hsa04142 Lysosome - Homo sapiens (human);	IPR011989; IPR016024; IPR002553;	Clathrin/coatomer adaptor, adaptin-like, N-terminal; Armadillo-type fold; Armadillo-like helical;	AP3 adapter complex; AP3-BLOC1 complex;
O00213	205	S	Amyloid beta A4 precursor protein-binding family B member 1	APBB1			0.814									.R....S......	PREHSKSASLLFG	nucl	single organism signaling; regulation of cell death; reproductive process; positive regulation of biosynthetic process; cellular component morphogenesis; cellular metabolic process; neurological system process; behavior; regulation of cell growth; response to external stimulus; metabolic process; single organism reproductive process; negative regulation of macromolecule biosynthetic process; prot…	membrane; cell periphery; cytoplasm; intracellular part; growth cone; nuclear body; cell; organelle part; membrane-enclosed lumen; nucleoplasm; intracellular organelle lumen; nuclear speck; intracellular; cell part; lamellipodium; neuron projection; membrane-bounded organelle; neuron part; nucleoplasm part; organelle lumen; cell leading edge; intracellular organelle; cell projection; intracellula…	beta-amyloid binding; peptide binding; binding; protein binding; amide binding; chromatin binding; transcription factor binding;	K04529	APBB1; amyloid beta (A4) precursor protein-binding, family B, member 1 (Fe65)	hsa05010 Alzheimer's disease - Homo sapiens (human);	IPR011993; IPR001202; IPR006020;	WW domain; PTB/PI domain; Pleckstrin homology-like domain;	FE65-TSHZ3-HDAC1 complex; APP-FE65-LRP complex;
O00231	14	S	26S proteasome non-ATPase regulatory subunit 11	PSMD11	2.907	3.101	3.11	1.088	1.053	1.071	2.67188	2.94492	2.90383	2.84021	0.00126894	...R..SL.....	EFQRAQSLLSTDR	cyto	cellular component biogenesis; single organism signaling; regulation of cell death; positive regulation of cellular protein metabolic process; positive regulation of ubiquitin-protein ligase activity; regulation of cell cycle process; cellular metabolic process; signal transduction involved in mitotic G1 DNA damage checkpoint; signal transduction involved in mitotic DNA integrity checkpoint; posi…	intracellular organelle; proteasome complex; intracellular organelle part; cytoplasm; macromolecular complex; nuclear lumen; intracellular part; cytosol; cell; organelle part; organelle; intracellular membrane-bounded organelle; membrane-enclosed lumen; nucleoplasm; nucleus; intracellular organelle lumen; proteasome accessory complex; intracellular; cell part; protein complex; membrane-bounded or…		K03036	PSMD11; 26S proteasome regulatory subunit N6	hsa03050 Proteasome - Homo sapiens (human); hsa05169 Epstein-Barr virus infection - Homo sapiens (human);	IPR000717; IPR011991; IPR011990; IPR013143;	Tetratricopeptide-like helical; Proteasome component (PCI) domain; PCI/PINT associated module; Winged helix-turn-helix DNA-binding domain;	PA700-20S-PA28 complex; PA700 complex;
O00231	415	Y	26S proteasome non-ATPase regulatory subunit 11	PSMD11			1.005	1.088	1.053	1.071			0.938375	0.938375			#N/A	cyto	cellular component biogenesis; single organism signaling; regulation of cell death; positive regulation of cellular protein metabolic process; positive regulation of ubiquitin-protein ligase activity; regulation of cell cycle process; cellular metabolic process; signal transduction involved in mitotic G1 DNA damage checkpoint; signal transduction involved in mitotic DNA integrity checkpoint; posi…	intracellular organelle; proteasome complex; intracellular organelle part; cytoplasm; macromolecular complex; nuclear lumen; intracellular part; cytosol; cell; organelle part; organelle; intracellular membrane-bounded organelle; membrane-enclosed lumen; nucleoplasm; nucleus; intracellular organelle lumen; proteasome accessory complex; intracellular; cell part; protein complex; membrane-bounded or…		K03036	PSMD11; 26S proteasome regulatory subunit N6	hsa03050 Proteasome - Homo sapiens (human); hsa05169 Epstein-Barr virus infection - Homo sapiens (human);	IPR000717; IPR011991; IPR011990; IPR013143;	Tetratricopeptide-like helical; Proteasome component (PCI) domain; PCI/PINT associated module; Winged helix-turn-helix DNA-binding domain;	PA700-20S-PA28 complex; PA700 complex;
O00257	415	S	E3 SUMO-protein ligase CBX4	CBX4	1.221	1.202	1.351			1.182			1.14298	1.14298		.R.R..S......	VRKRCLSETHGER	nucl	regulation of cell death; single-organism process; biosynthetic process; cellular metabolic process; negative regulation of RNA metabolic process; regulation of RNA biosynthetic process; metabolic process; macromolecule metabolic process; protein metabolic process; negative regulation of macromolecule biosynthetic process; regulation of gene expression; heterocycle biosynthetic process; regulatio…	intracellular organelle; intracellular organelle part; cytoplasm; macromolecular complex; nuclear lumen; intracellular part; nuclear body; cell; organelle part; intracellular membrane-bounded organelle; organelle; membrane-enclosed lumen; nucleoplasm; nucleus; intracellular organelle lumen; nuclear speck; intracellular; cell part; PRC1 complex; PcG protein complex; protein complex; membrane-bound…	DNA binding; RNA binding; transcription corepressor activity; ligase activity; protein binding; chromatin binding; transcription cofactor activity; SUMO binding; small conjugating protein binding; single-stranded RNA binding; regulatory region DNA binding; heterocyclic compound binding; organic cyclic compound binding; regulatory region nucleic acid binding; catalytic activity; transcription regu…	K11452			IPR017984; IPR023780; IPR016197; IPR000953;	Chromo domain/shadow; Chromo domain; Chromo domain-like; Chromo domain subgroup;	CtBP complex; Polycomb repressive complex; Polycomb repressive complex 1;
O00257	434	S	E3 SUMO-protein ligase CBX4	CBX4	1.385					1.182						...RS.S......	LTARSISTPTCLG	nucl	regulation of cell death; single-organism process; biosynthetic process; cellular metabolic process; negative regulation of RNA metabolic process; regulation of RNA biosynthetic process; metabolic process; macromolecule metabolic process; protein metabolic process; negative regulation of macromolecule biosynthetic process; regulation of gene expression; heterocycle biosynthetic process; regulatio…	intracellular organelle; intracellular organelle part; cytoplasm; macromolecular complex; nuclear lumen; intracellular part; nuclear body; cell; organelle part; intracellular membrane-bounded organelle; organelle; membrane-enclosed lumen; nucleoplasm; nucleus; intracellular organelle lumen; nuclear speck; intracellular; cell part; PRC1 complex; PcG protein complex; protein complex; membrane-bound…	DNA binding; RNA binding; transcription corepressor activity; ligase activity; protein binding; chromatin binding; transcription cofactor activity; SUMO binding; small conjugating protein binding; single-stranded RNA binding; regulatory region DNA binding; heterocyclic compound binding; organic cyclic compound binding; regulatory region nucleic acid binding; catalytic activity; transcription regu…	K11452			IPR017984; IPR023780; IPR016197; IPR000953;	Chromo domain/shadow; Chromo domain; Chromo domain-like; Chromo domain subgroup;	CtBP complex; Polycomb repressive complex; Polycomb repressive complex 1;
O00264	54	S	Membrane-associated progesterone receptor component 1	PGRMC1			0.945	1.035	1.02	1.004			0.941235	0.941235			GDQPAASGDSDDD	nucl	cellular component organization; single-multicellular organism process; cellular developmental process; neuron development; neurogenesis; cellular component morphogenesis; single-organism process; response to stimulus; cell development; axon guidance; cell morphogenesis involved in differentiation; anatomical structure morphogenesis; response to external stimulus; cell differentiation; cell morph…	membrane; nuclear outer membrane-endoplasmic reticulum membrane network; endoplasmic reticulum; organelle membrane; cytoplasm; intrinsic to membrane; intracellular part; cell; organelle part; non-membrane-bounded organelle; membrane-enclosed lumen; intracellular organelle lumen; membrane part; cell part; intracellular; membrane-bounded organelle; endoplasmic reticulum membrane; organelle lumen; i…	organic cyclic compound binding; heterocyclic compound binding; heme binding; binding; lipid binding; tetrapyrrole binding; steroid binding;	K17278			IPR001199;	Cytochrome b5-like heme/steroid binding domain;	PGRMC1-SCAP complex;
O00264	57	S	Membrane-associated progesterone receptor component 1	PGRMC1	0.986	1.011	0.997	1.035	1.02	1.004	0.952657	0.991176	0.993028	0.978954	0.324881	......SD.....	PAASGDSDDDEPP	nucl	cellular component organization; single-multicellular organism process; cellular developmental process; neuron development; neurogenesis; cellular component morphogenesis; single-organism process; response to stimulus; cell development; axon guidance; cell morphogenesis involved in differentiation; anatomical structure morphogenesis; response to external stimulus; cell differentiation; cell morph…	membrane; nuclear outer membrane-endoplasmic reticulum membrane network; endoplasmic reticulum; organelle membrane; cytoplasm; intrinsic to membrane; intracellular part; cell; organelle part; non-membrane-bounded organelle; membrane-enclosed lumen; intracellular organelle lumen; membrane part; cell part; intracellular; membrane-bounded organelle; endoplasmic reticulum membrane; organelle lumen; i…	organic cyclic compound binding; heterocyclic compound binding; heme binding; binding; lipid binding; tetrapyrrole binding; steroid binding;	K17278			IPR001199;	Cytochrome b5-like heme/steroid binding domain;	PGRMC1-SCAP complex;
O00264	181	S	Membrane-associated progesterone receptor component 1	PGRMC1	0.91	0.934	0.939	1.035	1.02	1.004	0.879227	0.915686	0.935259	0.910057	0.0509346	......SD.E...	EEPTVYSDEEEPK	nucl	cellular component organization; single-multicellular organism process; cellular developmental process; neuron development; neurogenesis; cellular component morphogenesis; single-organism process; response to stimulus; cell development; axon guidance; cell morphogenesis involved in differentiation; anatomical structure morphogenesis; response to external stimulus; cell differentiation; cell morph…	membrane; nuclear outer membrane-endoplasmic reticulum membrane network; endoplasmic reticulum; organelle membrane; cytoplasm; intrinsic to membrane; intracellular part; cell; organelle part; non-membrane-bounded organelle; membrane-enclosed lumen; intracellular organelle lumen; membrane part; cell part; intracellular; membrane-bounded organelle; endoplasmic reticulum membrane; organelle lumen; i…	organic cyclic compound binding; heterocyclic compound binding; heme binding; binding; lipid binding; tetrapyrrole binding; steroid binding;	K17278			IPR001199;	Cytochrome b5-like heme/steroid binding domain;	PGRMC1-SCAP complex;
O00267	666	S	Transcription elongation factor SPT5	SUPT5H	1.098	1.075		0.927	0.939	0.927	1.18447	1.14483		1.16465		....P.SP.....	GGFAPMSPRISSP	nucl	viral genome replication; positive regulation of biosynthetic process; regulation of response to extracellular stimulus; DNA-dependent transcription, elongation; cellular metabolic process; metabolic process; regulation of DNA-dependent transcription, elongation; negative regulation of macromolecule biosynthetic process; macromolecule metabolic process; interspecies interaction between organisms;…	intracellular organelle; intracellular organelle part; nuclear lumen; macromolecular complex; intracellular part; cell; organelle part; membrane-enclosed lumen; intracellular membrane-bounded organelle; DSIF complex; organelle; nucleoplasm; nucleus; intracellular organelle lumen; cell part; intracellular; transcription elongation factor complex; membrane-bounded organelle; protein complex; nucleo…		K15172			IPR008991; IPR006645; IPR024945; IPR005824; IPR005100; IPR022581;	KOW; Spt5 transcription elongation factor, N-terminal; Spt5 C-terminal domain; Translation protein SH3-like domain; Transcription elongation factor Spt5, NGN domain; NusG, N-terminal;	DSIF complex; Transcription elongation factor complex; RNA pol II containing coactivator complex Tat-SF;
O00267	1034	T	Transcription elongation factor SPT5	SUPT5H				0.927	0.939	0.927						......TP.K...	EHLEPITPTKNNK	nucl	viral genome replication; positive regulation of biosynthetic process; regulation of response to extracellular stimulus; DNA-dependent transcription, elongation; cellular metabolic process; metabolic process; regulation of DNA-dependent transcription, elongation; negative regulation of macromolecule biosynthetic process; macromolecule metabolic process; interspecies interaction between organisms;…	intracellular organelle; intracellular organelle part; nuclear lumen; macromolecular complex; intracellular part; cell; organelle part; membrane-enclosed lumen; intracellular membrane-bounded organelle; DSIF complex; organelle; nucleoplasm; nucleus; intracellular organelle lumen; cell part; intracellular; transcription elongation factor complex; membrane-bounded organelle; protein complex; nucleo…		K15172			IPR008991; IPR006645; IPR024945; IPR005824; IPR005100; IPR022581;	KOW; Spt5 transcription elongation factor, N-terminal; Spt5 C-terminal domain; Translation protein SH3-like domain; Transcription elongation factor Spt5, NGN domain; NusG, N-terminal;	DSIF complex; Transcription elongation factor complex; RNA pol II containing coactivator complex Tat-SF;
O00273	28	S	DNA fragmentation factor subunit alpha	DFFA	2.13	2.488	1.915	1.117	1.064	1.082	1.90689	2.33835	1.76987	2.00504	0.0212276	...R..S......	LLRRNYSREQHGV	nucl	regulation of cellular process; single organism signaling; cellular component organization; regulation of cell death; negative regulation of programmed cell death; DNA catabolic process; cellular aromatic compound metabolic process; death; DNA metabolic process; regulation of programmed cell death; single-organism process; negative regulation of biological process; negative regulation of cellular…	intracellular organelle; intracellular non-membrane-bounded organelle; intracellular organelle part; cytoplasm; nuclear lumen; intracellular part; cytosol; cell; organelle part; chromosomal part; non-membrane-bounded organelle; organelle; intracellular membrane-bounded organelle; membrane-enclosed lumen; nucleoplasm; nucleus; intracellular organelle lumen; chromatin; nuclear chromosome part; intr…	hydrolase activity; deoxyribonuclease activity; catalytic activity; hydrolase activity, acting on ester bonds; nuclease activity;	K02310	DFFA; DNA fragmentation factor, 45 kD, alpha subunit	hsa04210 Apoptosis - Homo sapiens (human);	IPR027296; IPR015121; IPR003508;	DNA fragmentation factor 45kDa C-terminal domain; DNA fragmentation factor 45kDa, middle domain; CIDE-N domain;
O00273	232	S	DNA fragmentation factor subunit alpha	DFFA				1.117	1.064	1.082						...R..S......	GISRETSSDVALA	nucl	regulation of cellular process; single organism signaling; cellular component organization; regulation of cell death; negative regulation of programmed cell death; DNA catabolic process; cellular aromatic compound metabolic process; death; DNA metabolic process; regulation of programmed cell death; single-organism process; negative regulation of biological process; negative regulation of cellular…	intracellular organelle; intracellular non-membrane-bounded organelle; intracellular organelle part; cytoplasm; nuclear lumen; intracellular part; cytosol; cell; organelle part; chromosomal part; non-membrane-bounded organelle; organelle; intracellular membrane-bounded organelle; membrane-enclosed lumen; nucleoplasm; nucleus; intracellular organelle lumen; chromatin; nuclear chromosome part; intr…	hydrolase activity; deoxyribonuclease activity; catalytic activity; hydrolase activity, acting on ester bonds; nuclease activity;	K02310	DFFA; DNA fragmentation factor, 45 kD, alpha subunit	hsa04210 Apoptosis - Homo sapiens (human);	IPR027296; IPR015121; IPR003508;	DNA fragmentation factor 45kDa C-terminal domain; DNA fragmentation factor 45kDa, middle domain; CIDE-N domain;
O00273	315	S	DNA fragmentation factor subunit alpha	DFFA	1.278	0.748		1.117	1.064	1.082	1.14414	0.703008		0.923572		......SP.....	ISASKASPPGDLQ	nucl	regulation of cellular process; single organism signaling; cellular component organization; regulation of cell death; negative regulation of programmed cell death; DNA catabolic process; cellular aromatic compound metabolic process; death; DNA metabolic process; regulation of programmed cell death; single-organism process; negative regulation of biological process; negative regulation of cellular…	intracellular organelle; intracellular non-membrane-bounded organelle; intracellular organelle part; cytoplasm; nuclear lumen; intracellular part; cytosol; cell; organelle part; chromosomal part; non-membrane-bounded organelle; organelle; intracellular membrane-bounded organelle; membrane-enclosed lumen; nucleoplasm; nucleus; intracellular organelle lumen; chromatin; nuclear chromosome part; intr…	hydrolase activity; deoxyribonuclease activity; catalytic activity; hydrolase activity, acting on ester bonds; nuclease activity;	K02310	DFFA; DNA fragmentation factor, 45 kD, alpha subunit	hsa04210 Apoptosis - Homo sapiens (human);	IPR027296; IPR015121; IPR003508;	DNA fragmentation factor 45kDa C-terminal domain; DNA fragmentation factor 45kDa, middle domain; CIDE-N domain;
O00303	258	S	Eukaryotic translation initiation factor 3 subunit F	EIF3F	1.083	1.077	1.126	1.013	1.001	1.033	1.0691	1.07592	1.09003	1.07835	0.00847888	......SP.R...	IMKTCFSPNRVIG	mito	proteolysis; metabolic process; macromolecule metabolic process; protein metabolic process; primary metabolic process; organic substance metabolic process;	cell part; intracellular; cytoplasm; macromolecular complex; intracellular part; protein complex; cytosol; cell; eukaryotic translation initiation factor 3 complex; cytoplasmic part;	organic cyclic compound binding; heterocyclic compound binding; RNA binding; translation factor activity, nucleic acid binding; peptidase activity; catalytic activity; binding; nucleic acid binding; translation initiation factor activity; peptidase activity, acting on L-amino acid peptides; hydrolase activity; cysteine-type peptidase activity;	K03249	EIF3F; translation initiation factor 3 subunit F	hsa03013 RNA transport - Homo sapiens (human);	IPR000555; IPR024969;	Rpn11/EIF3F C-terminal domain; JAB1/MPN/MOV34 metalloenzyme domain;	eIF3 complex;
O00308	211	S	NEDD4-like E3 ubiquitin-protein ligase WWP2	WWP2												......SP....R	PATGEQSPGARSR	mito	entry into host; regulation of biological quality; negative regulation of sequence-specific DNA binding transcription factor activity; movement in environment of other organism involved in symbiotic interaction; multi-organism cellular process; cellular metabolic process; negative regulation of RNA metabolic process; regulation of RNA biosynthetic process; metabolic process; regulation of potassi…	organelle; intracellular membrane-bounded organelle; intracellular organelle; nucleus; cell part; intracellular; cytoplasm; macromolecular complex; intracellular part; protein complex; ubiquitin ligase complex; membrane-bounded organelle; cell;	ligase activity, forming carbon-nitrogen bonds; small conjugating protein ligase activity; catalytic activity; RNA polymerase II transcription factor binding; binding; ubiquitin-protein ligase activity; ligase activity; protein binding; acid-amino acid ligase activity; transcription factor binding;	K05630	WWP2; atrophin-1 interacting protein 2 (WW domain containing E3 ubiquitin protein ligase 2) [EC:6.3.2.19]	hsa04120 Ubiquitin mediated proteolysis - Homo sapiens (human);	IPR001202; IPR000569; IPR000008;	WW domain; C2 domain; HECT;
O00358	308	S	Forkhead box protein E1	FOXE1	2.23	1.772	2.272		1.683	1.703		1.05288	1.33412	1.1935		....P.SP.....	RLAGPASPPAGGS	nucl	regulation of biological quality; gland development; thyroid gland development; positive regulation of biosynthetic process; cellular metabolic process; lens development in camera-type eye; metabolic process; hard palate development; embryonic organ morphogenesis; epidermis development; negative regulation of macromolecule biosynthetic process; embryo development; peripheral nervous system develo…	cell part; intracellular; macromolecular complex; intracellular part; transcription factor complex; protein complex; cell;	sequence-specific DNA binding RNA polymerase II transcription factor activity; DNA binding; RNA polymerase II distal enhancer sequence-specific DNA binding transcription factor activity; double-stranded DNA binding; protein binding; sequence-specific DNA binding; sequence-specific DNA binding transcription factor activity; heterocyclic compound binding; organic cyclic compound binding; binding; n…	K09398			IPR011991; IPR001766;	Winged helix-turn-helix DNA-binding domain; Transcription factor, fork head;
O00400	6	S	Acetyl-coenzyme A transporter 1	SLC33A1				0.894	0.786								-MSPTISHKDSSR	plas	transport; transmembrane transport; death; cell death; single-organism cellular process; single-organism process; localization; cellular process; single-organism transport; establishment of localization;	membrane; intracellular organelle; intrinsic to plasma membrane; endoplasmic reticulum; nuclear outer membrane-endoplasmic reticulum membrane network; organelle membrane; cell periphery; cytoplasm; intracellular organelle part; Golgi membrane; intrinsic to membrane; endomembrane system; intracellular part; integral to plasma membrane; cell; integral to membrane; organelle part; plasma membrane; i…	acetyl-CoA transporter activity; coenzyme transporter activity; cofactor transporter activity; transporter activity;	K03372	ACATN; MFS transporter, PAT family, solute carrier family 33 (acetyl-CoA transportor), member 1 [EC:2.3.1.-]	hsa01100 Metabolic pathways - Homo sapiens (human); hsa00604 Glycosphingolipid biosynthesis - ganglio series - Homo sapiens (human);	IPR016196;	Major facilitator superfamily domain, general substrate transporter;
O00400	10	S	Acetyl-coenzyme A transporter 1	SLC33A1				0.894	0.786								TISHKDSSRQRRP	plas	transport; transmembrane transport; death; cell death; single-organism cellular process; single-organism process; localization; cellular process; single-organism transport; establishment of localization;	membrane; intracellular organelle; intrinsic to plasma membrane; endoplasmic reticulum; nuclear outer membrane-endoplasmic reticulum membrane network; organelle membrane; cell periphery; cytoplasm; intracellular organelle part; Golgi membrane; intrinsic to membrane; endomembrane system; intracellular part; integral to plasma membrane; cell; integral to membrane; organelle part; plasma membrane; i…	acetyl-CoA transporter activity; coenzyme transporter activity; cofactor transporter activity; transporter activity;	K03372	ACATN; MFS transporter, PAT family, solute carrier family 33 (acetyl-CoA transportor), member 1 [EC:2.3.1.-]	hsa01100 Metabolic pathways - Homo sapiens (human); hsa00604 Glycosphingolipid biosynthesis - ganglio series - Homo sapiens (human);	IPR016196;	Major facilitator superfamily domain, general substrate transporter;
O00400	22	S	Acetyl-coenzyme A transporter 1	SLC33A1	1.212	1.668	1.379	0.894	0.786		1.3557	2.12214		1.73892		......SL.....	PGNFSHSLDMKSG	plas	transport; transmembrane transport; death; cell death; single-organism cellular process; single-organism process; localization; cellular process; single-organism transport; establishment of localization;	membrane; intracellular organelle; intrinsic to plasma membrane; endoplasmic reticulum; nuclear outer membrane-endoplasmic reticulum membrane network; organelle membrane; cell periphery; cytoplasm; intracellular organelle part; Golgi membrane; intrinsic to membrane; endomembrane system; intracellular part; integral to plasma membrane; cell; integral to membrane; organelle part; plasma membrane; i…	acetyl-CoA transporter activity; coenzyme transporter activity; cofactor transporter activity; transporter activity;	K03372	ACATN; MFS transporter, PAT family, solute carrier family 33 (acetyl-CoA transportor), member 1 [EC:2.3.1.-]	hsa01100 Metabolic pathways - Homo sapiens (human); hsa00604 Glycosphingolipid biosynthesis - ganglio series - Homo sapiens (human);	IPR016196;	Major facilitator superfamily domain, general substrate transporter;
O00401	256	Y	Neural Wiskott-Aldrich syndrome protein	WASL	0.454	0.469	0.452	0.998	1.072	0.995	0.45491	0.4375	0.454271	0.448894	0.000381493		#N/A	mito	cellular component biogenesis; regulation of vesicle-mediated transport; regulation of cell projection assembly; cellular component morphogenesis; cellular metabolic process; response to biotic stimulus; response to external stimulus; metabolic process; actin cytoskeleton organization; macromolecular complex assembly; regulation of localization; macromolecule metabolic process; protein localizati…	membrane; cell cortex; organelle membrane; cytoplasmic vesicle; membrane-bounded vesicle; cell periphery; cytoplasmic membrane-bounded vesicle; vesicle; cytoplasm; cytoplasmic vesicle part; cortical cytoskeleton; cortical actin cytoskeleton; intracellular part; cell; organelle part; non-membrane-bounded organelle; cytoskeleton; intracellular; cell part; lamellipodium; endocytic vesicle; membrane-…	small GTPase regulator activity; enzyme regulator activity; nucleoside-triphosphatase regulator activity; GTPase regulator activity;	K05747	WAS; Wiskott-Aldrich syndrome protein	hsa05100 Bacterial invasion of epithelial cells - Homo sapiens (human); hsa05132 Salmonella infection - Homo sapiens (human); hsa04666 Fc gamma R-mediated phagocytosis - Homo sapiens (human); hsa04520 Adherens junction - Homo sapiens (human); hsa05130 Pathogenic Escherichia coli infection - Homo sapiens (human); hsa05131 Shigellosis - Homo sapiens (human); hsa04810 Regulation of actin cytoskeleto…	IPR003124; IPR011993; IPR000095; IPR011026; IPR000697;	Pleckstrin homology-like domain; WH2 domain; Wiscott-Aldrich syndrome protein, C-terminal; WH1/EVH1; CRIB domain;	ABI1-WASL complex; N-WASp homomer;
O00410	827	S	Importin-5	IPO5	0.71	0.677	0.74	0.913	0.927	0.921	0.777656	0.730313	0.803474	0.770481	0.0167809	......SL.....	DEQVEESLQDEDD	cyto	intracellular transport; regulation of biological quality; NLS-bearing substrate import into nucleus; establishment of protein localization to organelle; protein import; single-organism process; nuclear transport; multi-organism cellular process; modification of morphology or physiology of other organism; protein transport; modification of morphology or physiology of other organism involved in sy…	intracellular organelle; membrane; nuclear pore; intracellular non-membrane-bounded organelle; nuclear envelope; pore complex; intracellular organelle part; organelle envelope; cytoplasm; nuclear lumen; macromolecular complex; intrinsic to membrane; endomembrane system; intracellular part; nucleolus; cell; integral to membrane; organelle part; non-membrane-bounded organelle; membrane-enclosed lum…	small GTPase binding; protein transporter activity; nucleoside-triphosphatase regulator activity; GTPase regulator activity; substrate-specific transporter activity; protein binding; GTPase inhibitor activity; enzyme inhibitor activity; enzyme regulator activity; Ras GTPase binding; binding; Ran GTPase binding; GTPase binding; enzyme binding; transporter activity;				IPR001494; IPR011989; IPR016024;	Importin-beta, N-terminal domain; Armadillo-type fold; Armadillo-like helical;
O00418	18	S	Eukaryotic elongation factor 2 kinase	EEF2K	1.183	1.207	1.165	1.101	1.081	1.013	1.07448	1.11656	1.15005	1.1137	0.0469237	...G..SP.....	GVDGGQSPRAGHD	cyto_nucl	single organism signaling; insulin receptor signaling pathway; cell surface receptor signaling pathway; single-organism process; biosynthetic process; cellular metabolic process; phosphate-containing compound metabolic process; metabolic process; signal transduction; cellular response to peptide; cell communication; protein autophosphorylation; response to endogenous stimulus; macromolecule metab…	cell part; intracellular; cytoplasm; intracellular part; cytosol; cell; cytoplasmic part;	nucleoside phosphate binding; phosphotransferase activity, alcohol group as acceptor; protein binding; calmodulin-dependent protein kinase activity; protein kinase activity; organic cyclic compound binding; heterocyclic compound binding; kinase activity; catalytic activity; ribonucleotide binding; binding; purine ribonucleoside binding; cation binding; anion binding; adenyl ribonucleotide binding…	K08292	EEF2K; elongation factor 2 kinase [EC:2.7.11.20]	hsa04921 Oxytocin signaling pathway - Homo sapiens (human); hsa04152 AMPK signaling pathway - Homo sapiens (human);	IPR011990; IPR004166; IPR011009;	Tetratricopeptide-like helical; Protein kinase-like domain; MHCK/EF2 kinase;
O00418	353	T	Eukaryotic elongation factor 2 kinase	EEF2K				1.101	1.081	1.013							KTILRGTEEKCGS	cyto_nucl	single organism signaling; insulin receptor signaling pathway; cell surface receptor signaling pathway; single-organism process; biosynthetic process; cellular metabolic process; phosphate-containing compound metabolic process; metabolic process; signal transduction; cellular response to peptide; cell communication; protein autophosphorylation; response to endogenous stimulus; macromolecule metab…	cell part; intracellular; cytoplasm; intracellular part; cytosol; cell; cytoplasmic part;	nucleoside phosphate binding; phosphotransferase activity, alcohol group as acceptor; protein binding; calmodulin-dependent protein kinase activity; protein kinase activity; organic cyclic compound binding; heterocyclic compound binding; kinase activity; catalytic activity; ribonucleotide binding; binding; purine ribonucleoside binding; cation binding; anion binding; adenyl ribonucleotide binding…	K08292	EEF2K; elongation factor 2 kinase [EC:2.7.11.20]	hsa04921 Oxytocin signaling pathway - Homo sapiens (human); hsa04152 AMPK signaling pathway - Homo sapiens (human);	IPR011990; IPR004166; IPR011009;	Tetratricopeptide-like helical; Protein kinase-like domain; MHCK/EF2 kinase;
O00418	445	S	Eukaryotic elongation factor 2 kinase	EEF2K				1.101	1.081	1.013						......S..R...	GDSGYPSEKRGEL	cyto_nucl	single organism signaling; insulin receptor signaling pathway; cell surface receptor signaling pathway; single-organism process; biosynthetic process; cellular metabolic process; phosphate-containing compound metabolic process; metabolic process; signal transduction; cellular response to peptide; cell communication; protein autophosphorylation; response to endogenous stimulus; macromolecule metab…	cell part; intracellular; cytoplasm; intracellular part; cytosol; cell; cytoplasmic part;	nucleoside phosphate binding; phosphotransferase activity, alcohol group as acceptor; protein binding; calmodulin-dependent protein kinase activity; protein kinase activity; organic cyclic compound binding; heterocyclic compound binding; kinase activity; catalytic activity; ribonucleotide binding; binding; purine ribonucleoside binding; cation binding; anion binding; adenyl ribonucleotide binding…	K08292	EEF2K; elongation factor 2 kinase [EC:2.7.11.20]	hsa04921 Oxytocin signaling pathway - Homo sapiens (human); hsa04152 AMPK signaling pathway - Homo sapiens (human);	IPR011990; IPR004166; IPR011009;	Tetratricopeptide-like helical; Protein kinase-like domain; MHCK/EF2 kinase;
O00418	474	S	Eukaryotic elongation factor 2 kinase	EEF2K		2.711	1.63	1.101	1.081	1.013		2.50786	1.60908	2.05847		......SL.....	YESDEDSLGSSGR	cyto_nucl	single organism signaling; insulin receptor signaling pathway; cell surface receptor signaling pathway; single-organism process; biosynthetic process; cellular metabolic process; phosphate-containing compound metabolic process; metabolic process; signal transduction; cellular response to peptide; cell communication; protein autophosphorylation; response to endogenous stimulus; macromolecule metab…	cell part; intracellular; cytoplasm; intracellular part; cytosol; cell; cytoplasmic part;	nucleoside phosphate binding; phosphotransferase activity, alcohol group as acceptor; protein binding; calmodulin-dependent protein kinase activity; protein kinase activity; organic cyclic compound binding; heterocyclic compound binding; kinase activity; catalytic activity; ribonucleotide binding; binding; purine ribonucleoside binding; cation binding; anion binding; adenyl ribonucleotide binding…	K08292	EEF2K; elongation factor 2 kinase [EC:2.7.11.20]	hsa04921 Oxytocin signaling pathway - Homo sapiens (human); hsa04152 AMPK signaling pathway - Homo sapiens (human);	IPR011990; IPR004166; IPR011009;	Tetratricopeptide-like helical; Protein kinase-like domain; MHCK/EF2 kinase;
O00425	438	S	Insulin-like growth factor 2 mRNA-binding protein 3	IGF2BP3		2.952	3.278	1.169	1.136	1.137		2.59859	2.88303	2.74081		.R....S......	SRFAGASIKIAPA	cyto	regulation of cellular process; regulation of macromolecule metabolic process; posttranscriptional regulation of gene expression; cellular protein metabolic process; biosynthetic process; negative regulation of translation; negative regulation of cellular metabolic process; negative regulation of biological process; negative regulation of cellular process; cellular metabolic process; regulation o…	organelle; intracellular membrane-bounded organelle; intracellular organelle; nucleus; cell part; intracellular; cytoplasm; intracellular part; membrane-bounded organelle; cytosol; cell; cytoplasmic part;	organic cyclic compound binding; heterocyclic compound binding; RNA binding; mRNA binding; mRNA 5'-UTR binding; nucleoside phosphate binding; mRNA 3'-UTR binding; binding; nucleic acid binding; nucleotide binding; translation regulator activity; small molecule binding;	K13197			IPR004087; IPR000504; IPR004088; IPR012677;	K Homology domain; Nucleotide-binding, alpha-beta plait; K Homology domain, type 1; RNA recognition motif domain;	Spliceosome;
O00429	529	S	Dynamin-1-like protein	DNM1L				0.979	0.98	0.989							ELPSAVSRDKSSK	cyto	cellular component biogenesis; regulation of cell death; nucleoside metabolic process; cellular component morphogenesis; regulation of mitochondrion organization; cellular metabolic process; metabolic process; GTP catabolic process; purine nucleotide catabolic process; guanosine-containing compound metabolic process; regulation of localization; purine ribonucleoside catabolic process; macromolecu…	membrane; outer membrane; microtubule; organelle membrane; cytoplasm; macromolecular complex; intracellular part; cell; organelle part; non-membrane-bounded organelle; mitochondrial envelope; cytoskeleton; microtubule cytoskeleton; intracellular; cell part; microbody; perinuclear region of cytoplasm; organelle outer membrane; membrane-bounded organelle; intracellular organelle; mitochondrial part…	nucleoside phosphate binding; nucleoside binding; ion binding; hydrolase activity, acting on acid anhydrides; hydrolase activity; nucleotide binding; nucleoside-triphosphatase activity; organic cyclic compound binding; heterocyclic compound binding; ribonucleoside binding; pyrophosphatase activity; catalytic activity; ribonucleotide binding; binding; GTPase activity; purine ribonucleoside binding…	K17065	DNM1L; dynamin 1-like protein [EC:3.6.5.5]	hsa04668 TNF signaling pathway - Homo sapiens (human);	IPR003130; IPR001401; IPR020850; IPR027417; IPR000375;	Dynamin central domain; Dynamin, GTPase domain; Dynamin GTPase effector; GTPase effector domain, GED; P-loop containing nucleoside triphosphate hydrolase;	DLP1-hFIS1 complex;
O00429	616	S	Dynamin-1-like protein	DNM1L	1.279	1.315	1.278	0.979	0.98	0.989	1.30644	1.34184	1.29221	1.3135	0.00251943	....P.SP.....	IPIMPASPQKGHA	cyto	cellular component biogenesis; regulation of cell death; nucleoside metabolic process; cellular component morphogenesis; regulation of mitochondrion organization; cellular metabolic process; metabolic process; GTP catabolic process; purine nucleotide catabolic process; guanosine-containing compound metabolic process; regulation of localization; purine ribonucleoside catabolic process; macromolecu…	membrane; outer membrane; microtubule; organelle membrane; cytoplasm; macromolecular complex; intracellular part; cell; organelle part; non-membrane-bounded organelle; mitochondrial envelope; cytoskeleton; microtubule cytoskeleton; intracellular; cell part; microbody; perinuclear region of cytoplasm; organelle outer membrane; membrane-bounded organelle; intracellular organelle; mitochondrial part…	nucleoside phosphate binding; nucleoside binding; ion binding; hydrolase activity, acting on acid anhydrides; hydrolase activity; nucleotide binding; nucleoside-triphosphatase activity; organic cyclic compound binding; heterocyclic compound binding; ribonucleoside binding; pyrophosphatase activity; catalytic activity; ribonucleotide binding; binding; GTPase activity; purine ribonucleoside binding…	K17065	DNM1L; dynamin 1-like protein [EC:3.6.5.5]	hsa04668 TNF signaling pathway - Homo sapiens (human);	IPR003130; IPR001401; IPR020850; IPR027417; IPR000375;	Dynamin central domain; Dynamin, GTPase domain; Dynamin GTPase effector; GTPase effector domain, GED; P-loop containing nucleoside triphosphate hydrolase;	DLP1-hFIS1 complex;
O00443	108	S	Phosphatidylinositol 4-phosphate 3-kinase C2 domain-containing subunit alpha	PIK3C2A		0.945		0.941	0.989	0.866		0.955511		0.955511		......S.E....	KLLLDDSFETKKT	cyto	single organism signaling; cellular component biogenesis; vesicle coating; muscle system process; regulation of biological quality; platelet-derived growth factor receptor signaling pathway; insulin receptor signaling pathway; cell surface receptor signaling pathway; single-organism process; establishment of localization; inositol lipid-mediated signaling; metabolic process; signal transduction; …	membrane; intracellular organelle; cytoplasmic vesicle; cell periphery; membrane-bounded vesicle; cytoplasmic membrane-bounded vesicle; vesicle; cytoplasm; intracellular part; cytosol; cell; coated vesicle; plasma membrane; intracellular membrane-bounded organelle; organelle; nucleus; clathrin-coated vesicle; cell part; intracellular; Golgi apparatus; membrane-bounded organelle; cytoplasmic part;	nucleoside phosphate binding; phosphotransferase activity, alcohol group as acceptor; heterocyclic compound binding; organic cyclic compound binding; kinase activity; ribonucleotide binding; catalytic activity; binding; phosphatidylinositol binding; purine ribonucleoside binding; lipid binding; anion binding; adenyl ribonucleotide binding; adenyl nucleotide binding; 1-phosphatidylinositol-4-phosp…	K00923	PIK3C2; phosphatidylinositol-4-phosphate 3-kinase [EC:2.7.1.154]	hsa00562 Inositol phosphate metabolism - Homo sapiens (human); hsa01100 Metabolic pathways - Homo sapiens (human); hsa04070 Phosphatidylinositol signaling system - Homo sapiens (human);	IPR000403; IPR001263; IPR002420; IPR001683; IPR011009; IPR016024; IPR000008; IPR000341;	Phosphatidylinositol 3-kinase Ras-binding (PI3K RBD) domain; Phosphoinositide 3-kinase, accessory (PIK) domain; Armadillo-type fold; Phosphatidylinositol 3-/4-kinase, catalytic domain; Phosphatidylinositol 3-kinase, C2 domain; Protein kinase-like domain; C2 domain; Phox homologous domain;	EGFR-containing signaling complex;
O00443	259	S	Phosphatidylinositol 4-phosphate 3-kinase C2 domain-containing subunit alpha	PIK3C2A	1.281	1.338	1.355	0.941	0.989	0.866	1.36132	1.35288	1.56467	1.42629	0.0261064	......SP.....	VSNLQVSPKSEDI	cyto	single organism signaling; cellular component biogenesis; vesicle coating; muscle system process; regulation of biological quality; platelet-derived growth factor receptor signaling pathway; insulin receptor signaling pathway; cell surface receptor signaling pathway; single-organism process; establishment of localization; inositol lipid-mediated signaling; metabolic process; signal transduction; …	membrane; intracellular organelle; cytoplasmic vesicle; cell periphery; membrane-bounded vesicle; cytoplasmic membrane-bounded vesicle; vesicle; cytoplasm; intracellular part; cytosol; cell; coated vesicle; plasma membrane; intracellular membrane-bounded organelle; organelle; nucleus; clathrin-coated vesicle; cell part; intracellular; Golgi apparatus; membrane-bounded organelle; cytoplasmic part;	nucleoside phosphate binding; phosphotransferase activity, alcohol group as acceptor; heterocyclic compound binding; organic cyclic compound binding; kinase activity; ribonucleotide binding; catalytic activity; binding; phosphatidylinositol binding; purine ribonucleoside binding; lipid binding; anion binding; adenyl ribonucleotide binding; adenyl nucleotide binding; 1-phosphatidylinositol-4-phosp…	K00923	PIK3C2; phosphatidylinositol-4-phosphate 3-kinase [EC:2.7.1.154]	hsa00562 Inositol phosphate metabolism - Homo sapiens (human); hsa01100 Metabolic pathways - Homo sapiens (human); hsa04070 Phosphatidylinositol signaling system - Homo sapiens (human);	IPR000403; IPR001263; IPR002420; IPR001683; IPR011009; IPR016024; IPR000008; IPR000341;	Phosphatidylinositol 3-kinase Ras-binding (PI3K RBD) domain; Phosphoinositide 3-kinase, accessory (PIK) domain; Armadillo-type fold; Phosphatidylinositol 3-/4-kinase, catalytic domain; Phosphatidylinositol 3-kinase, C2 domain; Protein kinase-like domain; C2 domain; Phox homologous domain;	EGFR-containing signaling complex;
O00443	338	S	Phosphatidylinositol 4-phosphate 3-kinase C2 domain-containing subunit alpha	PIK3C2A	1.06	1.026	1.022	0.941	0.989	0.866	1.12646	1.03741	1.18014	1.11467	0.145996	...RS.S......	TVTRSQSLNIRTT	cyto	single organism signaling; cellular component biogenesis; vesicle coating; muscle system process; regulation of biological quality; platelet-derived growth factor receptor signaling pathway; insulin receptor signaling pathway; cell surface receptor signaling pathway; single-organism process; establishment of localization; inositol lipid-mediated signaling; metabolic process; signal transduction; …	membrane; intracellular organelle; cytoplasmic vesicle; cell periphery; membrane-bounded vesicle; cytoplasmic membrane-bounded vesicle; vesicle; cytoplasm; intracellular part; cytosol; cell; coated vesicle; plasma membrane; intracellular membrane-bounded organelle; organelle; nucleus; clathrin-coated vesicle; cell part; intracellular; Golgi apparatus; membrane-bounded organelle; cytoplasmic part;	nucleoside phosphate binding; phosphotransferase activity, alcohol group as acceptor; heterocyclic compound binding; organic cyclic compound binding; kinase activity; ribonucleotide binding; catalytic activity; binding; phosphatidylinositol binding; purine ribonucleoside binding; lipid binding; anion binding; adenyl ribonucleotide binding; adenyl nucleotide binding; 1-phosphatidylinositol-4-phosp…	K00923	PIK3C2; phosphatidylinositol-4-phosphate 3-kinase [EC:2.7.1.154]	hsa00562 Inositol phosphate metabolism - Homo sapiens (human); hsa01100 Metabolic pathways - Homo sapiens (human); hsa04070 Phosphatidylinositol signaling system - Homo sapiens (human);	IPR000403; IPR001263; IPR002420; IPR001683; IPR011009; IPR016024; IPR000008; IPR000341;	Phosphatidylinositol 3-kinase Ras-binding (PI3K RBD) domain; Phosphoinositide 3-kinase, accessory (PIK) domain; Armadillo-type fold; Phosphatidylinositol 3-/4-kinase, catalytic domain; Phosphatidylinositol 3-kinase, C2 domain; Protein kinase-like domain; C2 domain; Phox homologous domain;	EGFR-containing signaling complex;
O00444	421	S	Serine/threonine-protein kinase PLK4	PLK4		0.812	1.104									......SP.....	ENEERYSPTDNNA	cyto	regulation of cellular process; single-multicellular organism process; cellular component organization; centrosome cycle; placenta development; embryonic organ development; chordate embryonic development; cellular developmental process; embryonic placenta development; centrosome organization; single-organism process; positive regulation of centriole replication; regulation of cell cycle process; …	microtubule organizing center part; cytoplasm; intracellular part; cell; cell division site part; organelle part; non-membrane-bounded organelle; membrane-enclosed lumen; cytoskeleton; microtubule organizing center; intracellular organelle lumen; microtubule cytoskeleton; intracellular; cell part; cleavage furrow; membrane-bounded organelle; organelle lumen; intracellular organelle; intracellular…	ATP binding; nucleoside phosphate binding; phosphotransferase activity, alcohol group as acceptor; nucleoside binding; ion binding; protein tyrosine kinase activity; protein kinase activity; nucleotide binding; organic cyclic compound binding; heterocyclic compound binding; ribonucleoside binding; kinase activity; catalytic activity; ribonucleotide binding; binding; purine ribonucleoside binding;…	K08863	PLK4; polo-like kinase 4 [EC:2.7.11.21]	hsa04068 FoxO signaling pathway - Homo sapiens (human);	IPR000959; IPR000719; IPR002290; IPR011009;	Protein kinase domain; POLO box duplicated domain; Protein kinase-like domain; Serine/threonine- /dual specificity protein kinase, catalytic domain;
O00459	449	Y	Phosphatidylinositol 3-kinase regulatory subunit beta	PIK3R2	1.636		1.627	1.361	1.192	1.076	1.20206		1.51208	1.35707			#N/A	nucl	single organism signaling; regulation of leukocyte activation; blood coagulation; regulation of biological quality; regulation of phosphatidylinositol 3-kinase activity; cell surface receptor signaling pathway; cellular lipid metabolic process; regulation of lipid metabolic process; cellular metabolic process; lipid biosynthetic process; metabolic process; response to endogenous stimulus; respons…	cell part; intracellular; cytoplasm; macromolecular complex; cytosolic part; intracellular part; protein complex; phosphatidylinositol 3-kinase complex; cytosol; cell; cytoplasmic part;	phosphatidylinositol 3-kinase regulator activity; kinase regulator activity; enzyme regulator activity;	K02649	PIK3R; phosphoinositide-3-kinase, regulatory subunit	hsa04662 B cell receptor signaling pathway - Homo sapiens (human); hsa05220 Chronic myeloid leukemia - Homo sapiens (human); hsa04014 Ras signaling pathway - Homo sapiens (human); hsa04150 mTOR signaling pathway - Homo sapiens (human); hsa04022 cGMP-PKG signaling pathway - Homo sapiens (human); hsa05222 Small cell lung cancer - Homo sapiens (human); hsa05162 Measles - Homo sapiens (human); hsa052…	IPR000980; IPR001452; IPR008936; IPR000198;	SH3 domain; Rho GTPase activation protein; SH2 domain; Rho GTPase-activating protein domain;
O00459	464	Y	Phosphatidylinositol 3-kinase regulatory subunit beta	PIK3R2	1.023		1.153	1.361	1.192	1.076	0.751653		1.07156	0.911607			#N/A	nucl	single organism signaling; regulation of leukocyte activation; blood coagulation; regulation of biological quality; regulation of phosphatidylinositol 3-kinase activity; cell surface receptor signaling pathway; cellular lipid metabolic process; regulation of lipid metabolic process; cellular metabolic process; lipid biosynthetic process; metabolic process; response to endogenous stimulus; respons…	cell part; intracellular; cytoplasm; macromolecular complex; cytosolic part; intracellular part; protein complex; phosphatidylinositol 3-kinase complex; cytosol; cell; cytoplasmic part;	phosphatidylinositol 3-kinase regulator activity; kinase regulator activity; enzyme regulator activity;	K02649	PIK3R; phosphoinositide-3-kinase, regulatory subunit	hsa04662 B cell receptor signaling pathway - Homo sapiens (human); hsa05220 Chronic myeloid leukemia - Homo sapiens (human); hsa04014 Ras signaling pathway - Homo sapiens (human); hsa04150 mTOR signaling pathway - Homo sapiens (human); hsa04022 cGMP-PKG signaling pathway - Homo sapiens (human); hsa05222 Small cell lung cancer - Homo sapiens (human); hsa05162 Measles - Homo sapiens (human); hsa052…	IPR000980; IPR001452; IPR008936; IPR000198;	SH3 domain; Rho GTPase activation protein; SH2 domain; Rho GTPase-activating protein domain;
O00469	608	T	Procollagen-lysine,2-oxoglutarate 5-dioxygenase 2	PLOD2		1.361		1.192	1.173	1.216		1.16027		1.16027			GYENVPTDDIHMK	extr	cellular component organization; response to stress; response to abiotic stimulus; single-organism cellular process; cellular protein metabolic process; single-organism process; response to stimulus; primary metabolic process; cellular metabolic process; organic substance metabolic process; metabolic process; extracellular structure organization; response to hypoxia; response to oxygen levels; ce…	membrane; intracellular organelle; endoplasmic reticulum; nuclear outer membrane-endoplasmic reticulum membrane network; rough endoplasmic reticulum membrane; rough endoplasmic reticulum; organelle membrane; cytoplasm; intracellular organelle part; endomembrane system; intracellular part; cell; organelle part; intracellular membrane-bounded organelle; organelle; endoplasmic reticulum part; intrac…	vitamin binding; iron ion binding; peptidyl-lysine 5-dioxygenase activity; L-ascorbic acid binding; ion binding; oxidoreductase activity, acting on paired donors, with incorporation or reduction of molecular oxygen; oxidoreductase activity, acting on paired donors, with incorporation or reduction of molecular oxygen, 2-oxoglutarate as one donor, and incorporation of one atom each of oxygen into b…	K13645	PLOD2; procollagen-lysine,2-oxoglutarate 5-dioxygenase 2 [EC:1.14.11.4]	hsa00310 Lysine degradation - Homo sapiens (human);	IPR006620; IPR005123;	Prolyl 4-hydroxylase, alpha subunit; Oxoglutarate/iron-dependent dioxygenase;
O00483	66	S	NADH dehydrogenase [ubiquinone] 1 alpha subcomplex subunit 4	NDUFA4			1.489	1.07	1.077	1.03			1.44563	1.44563		...K..S......	DQYKFYSVNVDYS	mito	phosphorylation; ATP synthesis coupled electron transport; oxidation-reduction process; small molecule metabolic process; oxidative phosphorylation; mitochondrial electron transport, NADH to ubiquinone; respiratory electron transport chain; cellular respiration; cellular metabolic process; phosphate-containing compound metabolic process; metabolic process; generation of precursor metabolites and …	membrane; organelle membrane; cytoplasm; macromolecular complex; respiratory chain complex I; intracellular part; mitochondrial respiratory chain complex I; mitochondrial membrane part; cell; organelle part; mitochondrial envelope; intracellular; cell part; membrane part; organelle inner membrane; membrane-bounded organelle; mitochondrial inner membrane; mitochondrial respiratory chain complex IV…	NADH dehydrogenase (quinone) activity; oxidoreductase activity, acting on NAD(P)H; NADH dehydrogenase activity; catalytic activity; oxidoreductase activity, acting on NAD(P)H, quinone or similar compound as acceptor; NADH dehydrogenase (ubiquinone) activity; oxidoreductase activity;	K03948	NDUFA4; NADH dehydrogenase (ubiquinone) 1 alpha subcomplex subunit 4	hsa05010 Alzheimer's disease - Homo sapiens (human); hsa05016 Huntington's disease - Homo sapiens (human); hsa04932 Non-alcoholic fatty liver disease (NAFLD) - Homo sapiens (human); hsa01100 Metabolic pathways - Homo sapiens (human); hsa00190 Oxidative phosphorylation - Homo sapiens (human); hsa05012 Parkinson's disease - Homo sapiens (human);			Respiratory chain complex I, mitochondrial; Respiratory chain complex Imitochondrial;
O00499	296	S	Myc box-dependent-interacting protein 1	BIN1	1.687	1.814	1.72	1.126	1.061	1.075	1.49822	1.70971	1.6	1.60264	0.00971416	.....KSP.....	PAKGNKSPSPPDG	cyto	regulation of vesicle-mediated transport; regulation of biological quality; cellular developmental process; regulation of nucleotide catabolic process; single-organism process; multi-organism cellular process; modification of morphology or physiology of other organism; establishment of localization; positive regulation of cellular component organization; regulation of localization; positive regul…	cytoplasmic vesicle; membrane-bounded vesicle; cytoplasmic membrane-bounded vesicle; vesicle; cytoplasm; varicosity; intracellular part; cerebellar mossy fiber; cell; axon terminus; non-membrane-bounded organelle; cytoskeleton; clathrin-coated vesicle; synaptic vesicle; main axon; intracellular; cell part; neuron projection; membrane-bounded organelle; neuron projection terminus; neuron part; syn…					IPR001452; IPR027267; IPR004148;	Arfaptin homology (AH) domain/BAR domain; SH3 domain; BAR domain;
O00499	298	S	Myc box-dependent-interacting protein 1	BIN1	1.072			1.126	1.061	1.075	0.952043			0.952043		......SP.....	KGNKSPSPPDGSP	cyto	regulation of vesicle-mediated transport; regulation of biological quality; cellular developmental process; regulation of nucleotide catabolic process; single-organism process; multi-organism cellular process; modification of morphology or physiology of other organism; establishment of localization; positive regulation of cellular component organization; regulation of localization; positive regul…	cytoplasmic vesicle; membrane-bounded vesicle; cytoplasmic membrane-bounded vesicle; vesicle; cytoplasm; varicosity; intracellular part; cerebellar mossy fiber; cell; axon terminus; non-membrane-bounded organelle; cytoskeleton; clathrin-coated vesicle; synaptic vesicle; main axon; intracellular; cell part; neuron projection; membrane-bounded organelle; neuron projection terminus; neuron part; syn…					IPR001452; IPR027267; IPR004148;	Arfaptin homology (AH) domain/BAR domain; SH3 domain; BAR domain;
O00499	303	S	Myc box-dependent-interacting protein 1	BIN1				1.126	1.061	1.075						......SP.....	PSPPDGSPAATPE	cyto	regulation of vesicle-mediated transport; regulation of biological quality; cellular developmental process; regulation of nucleotide catabolic process; single-organism process; multi-organism cellular process; modification of morphology or physiology of other organism; establishment of localization; positive regulation of cellular component organization; regulation of localization; positive regul…	cytoplasmic vesicle; membrane-bounded vesicle; cytoplasmic membrane-bounded vesicle; vesicle; cytoplasm; varicosity; intracellular part; cerebellar mossy fiber; cell; axon terminus; non-membrane-bounded organelle; cytoskeleton; clathrin-coated vesicle; synaptic vesicle; main axon; intracellular; cell part; neuron projection; membrane-bounded organelle; neuron projection terminus; neuron part; syn…					IPR001452; IPR027267; IPR004148;	Arfaptin homology (AH) domain/BAR domain; SH3 domain; BAR domain;
O00499	323	T	Myc box-dependent-interacting protein 1	BIN1			1.645	1.126	1.061	1.075			1.53023	1.53023		......TP.....	EPAGGATPGATLP	cyto	regulation of vesicle-mediated transport; regulation of biological quality; cellular developmental process; regulation of nucleotide catabolic process; single-organism process; multi-organism cellular process; modification of morphology or physiology of other organism; establishment of localization; positive regulation of cellular component organization; regulation of localization; positive regul…	cytoplasmic vesicle; membrane-bounded vesicle; cytoplasmic membrane-bounded vesicle; vesicle; cytoplasm; varicosity; intracellular part; cerebellar mossy fiber; cell; axon terminus; non-membrane-bounded organelle; cytoskeleton; clathrin-coated vesicle; synaptic vesicle; main axon; intracellular; cell part; neuron projection; membrane-bounded organelle; neuron projection terminus; neuron part; syn…					IPR001452; IPR027267; IPR004148;	Arfaptin homology (AH) domain/BAR domain; SH3 domain; BAR domain;
O00499	331	S	Myc box-dependent-interacting protein 1	BIN1	1.832	1.737	1.928	1.126	1.061	1.075	1.627	1.63713	1.79349	1.68587	0.00542969	....P.SP.....	GATLPKSPSQLRK	cyto	regulation of vesicle-mediated transport; regulation of biological quality; cellular developmental process; regulation of nucleotide catabolic process; single-organism process; multi-organism cellular process; modification of morphology or physiology of other organism; establishment of localization; positive regulation of cellular component organization; regulation of localization; positive regul…	cytoplasmic vesicle; membrane-bounded vesicle; cytoplasmic membrane-bounded vesicle; vesicle; cytoplasm; varicosity; intracellular part; cerebellar mossy fiber; cell; axon terminus; non-membrane-bounded organelle; cytoskeleton; clathrin-coated vesicle; synaptic vesicle; main axon; intracellular; cell part; neuron projection; membrane-bounded organelle; neuron projection terminus; neuron part; syn…					IPR001452; IPR027267; IPR004148;	Arfaptin homology (AH) domain/BAR domain; SH3 domain; BAR domain;
O00505	60	S	Importin subunit alpha-4	KPNA3	0.89	0.89	0.889	1.005	0.947	0.996	0.885572	0.93981	0.89257	0.905984	0.0492099	......SD.....	EESLEDSDVDADF	cyto	entry into host; cellular component biogenesis; single organism signaling; NLS-bearing substrate import into nucleus; establishment of protein localization to organelle; cell surface receptor signaling pathway; protein import; movement in environment of other organism involved in symbiotic interaction; single-organism process; nuclear transport; multi-organism cellular process; cellular response …	membrane; cytoplasm; macromolecular complex; intrinsic to membrane; intracellular part; cell; organelle part; membrane-enclosed lumen; nucleoplasm; intracellular organelle lumen; membrane part; intracellular; cell part; membrane-bounded organelle; organelle lumen; intracellular organelle; nuclear pore; nuclear envelope; pore complex; organelle envelope; intracellular organelle part; endomembrane …	signal sequence binding; protein transporter activity; peptide binding; binding; nuclear localization sequence binding; substrate-specific transporter activity; amide binding; transporter activity;				IPR002652; IPR011989; IPR016024;	Armadillo-type fold; Armadillo-like helical; Importin-alpha, importin-beta-binding domain;	TNF-alpha/NF-kappa B signaling complex; CTCF-nucleophosmin-PARP-HIS-KPNA-LMNA-TOP complex;
O00512	104	S	B-cell CLL/lymphoma 9 protein	BCL9	0.79	0.745										...RS.S......	KRERSISADSFDQ	nucl	single organism signaling; negative regulation of developmental process; myotube differentiation; cell surface receptor signaling pathway; cellular developmental process; positive regulation of biosynthetic process; single-organism process; response to wounding; regulation of RNA biosynthetic process; signal transduction; cell communication; positive regulation of metabolic process; positive regu…	organelle; intracellular membrane-bounded organelle; intracellular organelle; nucleus; cell part; intracellular; cytoplasm; intracellular part; membrane-bounded organelle; cell;					IPR024670;	B-cell lymphoma 9, beta-catenin binding domain;
O00512	278	S	B-cell CLL/lymphoma 9 protein	BCL9	1.12	1.224	1.235									......SP....K	RPLDRESPGVENK	nucl	single organism signaling; negative regulation of developmental process; myotube differentiation; cell surface receptor signaling pathway; cellular developmental process; positive regulation of biosynthetic process; single-organism process; response to wounding; regulation of RNA biosynthetic process; signal transduction; cell communication; positive regulation of metabolic process; positive regu…	organelle; intracellular membrane-bounded organelle; intracellular organelle; nucleus; cell part; intracellular; cytoplasm; intracellular part; membrane-bounded organelle; cell;					IPR024670;	B-cell lymphoma 9, beta-catenin binding domain;
O00512	315	T	B-cell CLL/lymphoma 9 protein	BCL9	0.877		0.984									......TP.....	PNNRAVTPVSQGS	nucl	single organism signaling; negative regulation of developmental process; myotube differentiation; cell surface receptor signaling pathway; cellular developmental process; positive regulation of biosynthetic process; single-organism process; response to wounding; regulation of RNA biosynthetic process; signal transduction; cell communication; positive regulation of metabolic process; positive regu…	organelle; intracellular membrane-bounded organelle; intracellular organelle; nucleus; cell part; intracellular; cytoplasm; intracellular part; membrane-bounded organelle; cell;					IPR024670;	B-cell lymphoma 9, beta-catenin binding domain;
O00512	687	S	B-cell CLL/lymphoma 9 protein	BCL9												....P.SP.....	PVEGPLSPSRGDF	nucl	single organism signaling; negative regulation of developmental process; myotube differentiation; cell surface receptor signaling pathway; cellular developmental process; positive regulation of biosynthetic process; single-organism process; response to wounding; regulation of RNA biosynthetic process; signal transduction; cell communication; positive regulation of metabolic process; positive regu…	organelle; intracellular membrane-bounded organelle; intracellular organelle; nucleus; cell part; intracellular; cytoplasm; intracellular part; membrane-bounded organelle; cell;					IPR024670;	B-cell lymphoma 9, beta-catenin binding domain;
O00512	913	S	B-cell CLL/lymphoma 9 protein	BCL9		0.819										.....GS......	SPPVLGSAAASPV	nucl	single organism signaling; negative regulation of developmental process; myotube differentiation; cell surface receptor signaling pathway; cellular developmental process; positive regulation of biosynthetic process; single-organism process; response to wounding; regulation of RNA biosynthetic process; signal transduction; cell communication; positive regulation of metabolic process; positive regu…	organelle; intracellular membrane-bounded organelle; intracellular organelle; nucleus; cell part; intracellular; cytoplasm; intracellular part; membrane-bounded organelle; cell;					IPR024670;	B-cell lymphoma 9, beta-catenin binding domain;
O00559	36	S	Receptor-binding cancer antigen expressed on SiSo cells	EBAG9	1.047	1.066	1.023									.R.R..S......	GRGRKLSGDQITL	mito	regulation of cell growth; regulation of cellular process; regulation of biological process; regulation of growth; death; cell death; apoptotic process; single-organism cellular process; single-organism process; regulation of cellular component organization; programmed cell death; cellular process; biological regulation;	membrane; cytoplasmic vesicle; organelle membrane; membrane-bounded vesicle; cell periphery; cell junction; cytoplasmic membrane-bounded vesicle; vesicle; cytoplasm; intrinsic to membrane; intracellular part; cell; organelle part; focal adhesion; membrane part; intracellular; cell part; adherens junction; Golgi apparatus part; secretory granule; cell-substrate junction; membrane-bounded organelle…	peptidase activator activity; enzyme regulator activity; peptidase activator activity involved in apoptotic process; enzyme activator activity; peptidase regulator activity;
O00560	6	S	Syntenin-1	SDCBP	1.193		1.134	1.238	1.104	1.245	0.963651		0.910843	0.937247			-MSLYPSLEDLKV	cysk	cellular component biogenesis; positive regulation of JNK cascade; single organism signaling; regulation of stress-activated MAPK cascade; localization of cell; regulation of signaling; cellular developmental process; neuron development; cellular component morphogenesis; neurogenesis; single-organism process; neurological system process; protein transport; establishment of localization; protein t…	membrane; extracellular region part; endoplasmic reticulum; nuclear outer membrane-endoplasmic reticulum membrane network; cytoplasmic vesicle; organelle membrane; cell periphery; membrane-bounded vesicle; cell junction; cytoplasmic membrane-bounded vesicle; vesicle; cytoplasm; macromolecular complex; intrinsic to membrane; interleukin-5 receptor complex; intracellular part; integral to plasma me…	interleukin-5 receptor binding; syndecan binding; cytoskeletal protein binding; protein binding, bridging; receptor binding; cytoskeletal adaptor activity; binding; cytokine receptor binding; growth factor receptor binding; binding, bridging; protein binding;	K17254			IPR001478;	PDZ domain;
O00562	593	S	Membrane-associated phosphatidylinositol transfer protein 1	PITPNM1												...RR.S......	GSSRRGSMNNELL	cyto	regulation of cellular process; single organism signaling; single-multicellular organism process; detection of external stimulus; response to abiotic stimulus; brain development; single-organism process; response to stimulus; protein transport; establishment of localization; organic substance metabolic process; response to external stimulus; signal transduction; metabolic process; cell communicat…	membrane; endoplasmic reticulum; nuclear outer membrane-endoplasmic reticulum membrane network; organelle membrane; cytoplasm; intracellular part; cell; organelle part; cell division site part; intracellular; membrane part; cell part; Golgi apparatus part; cleavage furrow; lipid particle; membrane-bounded organelle; endoplasmic reticulum membrane; intracellular organelle; Golgi cisterna membrane;…	binding; ion binding; lipid transporter activity; cation binding; metal ion binding; substrate-specific transporter activity; phosphatidylinositol transporter activity; transporter activity; phospholipid transporter activity;				IPR004177; IPR013209; IPR023393; IPR023214;	HAD-like domain; DDHD; LNS2, Lipin/Ned1/Smp2; START-like domain;
O00562	896	S	Membrane-associated phosphatidylinositol transfer protein 1	PITPNM1			1.478									......SP...R.	EEPSIYSPAFPRE	cyto	regulation of cellular process; single organism signaling; single-multicellular organism process; detection of external stimulus; response to abiotic stimulus; brain development; single-organism process; response to stimulus; protein transport; establishment of localization; organic substance metabolic process; response to external stimulus; signal transduction; metabolic process; cell communicat…	membrane; endoplasmic reticulum; nuclear outer membrane-endoplasmic reticulum membrane network; organelle membrane; cytoplasm; intracellular part; cell; organelle part; cell division site part; intracellular; membrane part; cell part; Golgi apparatus part; cleavage furrow; lipid particle; membrane-bounded organelle; endoplasmic reticulum membrane; intracellular organelle; Golgi cisterna membrane;…	binding; ion binding; lipid transporter activity; cation binding; metal ion binding; substrate-specific transporter activity; phosphatidylinositol transporter activity; transporter activity; phospholipid transporter activity;				IPR004177; IPR013209; IPR023393; IPR023214;	HAD-like domain; DDHD; LNS2, Lipin/Ned1/Smp2; START-like domain;
O00562	1205	S	Membrane-associated phosphatidylinositol transfer protein 1	PITPNM1		1.303	1.507									...R..S......	DFLRKQSQLLRSR	cyto	regulation of cellular process; single organism signaling; single-multicellular organism process; detection of external stimulus; response to abiotic stimulus; brain development; single-organism process; response to stimulus; protein transport; establishment of localization; organic substance metabolic process; response to external stimulus; signal transduction; metabolic process; cell communicat…	membrane; endoplasmic reticulum; nuclear outer membrane-endoplasmic reticulum membrane network; organelle membrane; cytoplasm; intracellular part; cell; organelle part; cell division site part; intracellular; membrane part; cell part; Golgi apparatus part; cleavage furrow; lipid particle; membrane-bounded organelle; endoplasmic reticulum membrane; intracellular organelle; Golgi cisterna membrane;…	binding; ion binding; lipid transporter activity; cation binding; metal ion binding; substrate-specific transporter activity; phosphatidylinositol transporter activity; transporter activity; phospholipid transporter activity;				IPR004177; IPR013209; IPR023393; IPR023214;	HAD-like domain; DDHD; LNS2, Lipin/Ned1/Smp2; START-like domain;
O00562	1237	S	Membrane-associated phosphatidylinositol transfer protein 1	PITPNM1	1.15	1.124										...RS.S......	GKARSISLKLDSE	cyto	regulation of cellular process; single organism signaling; single-multicellular organism process; detection of external stimulus; response to abiotic stimulus; brain development; single-organism process; response to stimulus; protein transport; establishment of localization; organic substance metabolic process; response to external stimulus; signal transduction; metabolic process; cell communicat…	membrane; endoplasmic reticulum; nuclear outer membrane-endoplasmic reticulum membrane network; organelle membrane; cytoplasm; intracellular part; cell; organelle part; cell division site part; intracellular; membrane part; cell part; Golgi apparatus part; cleavage furrow; lipid particle; membrane-bounded organelle; endoplasmic reticulum membrane; intracellular organelle; Golgi cisterna membrane;…	binding; ion binding; lipid transporter activity; cation binding; metal ion binding; substrate-specific transporter activity; phosphatidylinositol transporter activity; transporter activity; phospholipid transporter activity;				IPR004177; IPR013209; IPR023393; IPR023214;	HAD-like domain; DDHD; LNS2, Lipin/Ned1/Smp2; START-like domain;
O00566	163	S	U3 small nucleolar ribonucleoprotein protein MPP10	MPHOSPH10			0.914	1.012	1.108	1.024			0.892578	0.892578		.....KSP.....	KSDLRKSPVFSDE	nucl	cellular component biogenesis; regulation of cellular process; ribonucleoprotein complex biogenesis; cellular aromatic compound metabolic process; negative regulation of phosphatase activity; cellular metabolic process; negative regulation of hydrolase activity; organic substance metabolic process; metabolic process; heterocycle metabolic process; nucleobase-containing compound metabolic process;…	intracellular organelle; intracellular non-membrane-bounded organelle; intracellular organelle part; macromolecular complex; nuclear lumen; intracellular part; nucleolus; cell; organelle part; non-membrane-bounded organelle; organelle; intracellular membrane-bounded organelle; membrane-enclosed lumen; nucleus; intracellular organelle lumen; small nucleolar ribonucleoprotein complex; intracellular…		K14559	MPP10; U3 small nucleolar RNA-associated protein MPP10	hsa03008 Ribosome biogenesis in eukaryotes - Homo sapiens (human);			IMP3-IMP4-MPP10 complex;
O00566	167	S	U3 small nucleolar ribonucleoprotein protein MPP10	MPHOSPH10			0.914	1.012	1.108	1.024			0.892578	0.892578		......S.E....	RKSPVFSDEDSDL	nucl	cellular component biogenesis; regulation of cellular process; ribonucleoprotein complex biogenesis; cellular aromatic compound metabolic process; negative regulation of phosphatase activity; cellular metabolic process; negative regulation of hydrolase activity; organic substance metabolic process; metabolic process; heterocycle metabolic process; nucleobase-containing compound metabolic process;…	intracellular organelle; intracellular non-membrane-bounded organelle; intracellular organelle part; macromolecular complex; nuclear lumen; intracellular part; nucleolus; cell; organelle part; non-membrane-bounded organelle; organelle; intracellular membrane-bounded organelle; membrane-enclosed lumen; nucleus; intracellular organelle lumen; small nucleolar ribonucleoprotein complex; intracellular…		K14559	MPP10; U3 small nucleolar RNA-associated protein MPP10	hsa03008 Ribosome biogenesis in eukaryotes - Homo sapiens (human);			IMP3-IMP4-MPP10 complex;
O00566	171	S	U3 small nucleolar ribonucleoprotein protein MPP10	MPHOSPH10			0.914	1.012	1.108	1.024			0.892578	0.892578		......SD.....	VFSDEDSDLDFDI	nucl	cellular component biogenesis; regulation of cellular process; ribonucleoprotein complex biogenesis; cellular aromatic compound metabolic process; negative regulation of phosphatase activity; cellular metabolic process; negative regulation of hydrolase activity; organic substance metabolic process; metabolic process; heterocycle metabolic process; nucleobase-containing compound metabolic process;…	intracellular organelle; intracellular non-membrane-bounded organelle; intracellular organelle part; macromolecular complex; nuclear lumen; intracellular part; nucleolus; cell; organelle part; non-membrane-bounded organelle; organelle; intracellular membrane-bounded organelle; membrane-enclosed lumen; nucleus; intracellular organelle lumen; small nucleolar ribonucleoprotein complex; intracellular…		K14559	MPP10; U3 small nucleolar RNA-associated protein MPP10	hsa03008 Ribosome biogenesis in eukaryotes - Homo sapiens (human);			IMP3-IMP4-MPP10 complex;
O00567	314	S	Nucleolar protein 56	NOP56	1.482	1.438	1.311	1.023	1.014	1.027	1.44868	1.41815	1.27653	1.38112	0.0214938	......SL.....	LIAHAGSLTNLAK	nucl	rRNA metabolic process; RNA processing; ncRNA processing; cellular component biogenesis; ribonucleoprotein complex biogenesis; cellular aromatic compound metabolic process; death; single-organism cellular process; nitrogen compound metabolic process; organic cyclic compound metabolic process; ribosome biogenesis; single-organism process; primary metabolic process; cellular metabolic process; orga…	intracellular organelle; intracellular non-membrane-bounded organelle; cytoplasm; intracellular organelle part; nuclear lumen; macromolecular complex; nucleolar part; intracellular part; nucleolus; cell; organelle part; pre-snoRNP complex; non-membrane-bounded organelle; membrane-enclosed lumen; intracellular membrane-bounded organelle; organelle; nucleus; intracellular organelle lumen; small nuc…	snoRNA binding; organic cyclic compound binding; heterocyclic compound binding; RNA binding; binding; nucleic acid binding;	K14564	NOP56; nucleolar protein 56	hsa03008 Ribosome biogenesis in eukaryotes - Homo sapiens (human);	IPR002687; IPR012974; IPR012976;	NOP5, N-terminal; NOSIC; Nop domain;	Nop56p-associated pre-rRNA complex;
O00567	519	S	Nucleolar protein 56	NOP56	0.825	0.941	0.893	1.023	1.014	1.027	0.806452	0.928008	0.869523	0.867994	0.102223		SKEELMSSDLEET	nucl	rRNA metabolic process; RNA processing; ncRNA processing; cellular component biogenesis; ribonucleoprotein complex biogenesis; cellular aromatic compound metabolic process; death; single-organism cellular process; nitrogen compound metabolic process; organic cyclic compound metabolic process; ribosome biogenesis; single-organism process; primary metabolic process; cellular metabolic process; orga…	intracellular organelle; intracellular non-membrane-bounded organelle; cytoplasm; intracellular organelle part; nuclear lumen; macromolecular complex; nucleolar part; intracellular part; nucleolus; cell; organelle part; pre-snoRNP complex; non-membrane-bounded organelle; membrane-enclosed lumen; intracellular membrane-bounded organelle; organelle; nucleus; intracellular organelle lumen; small nuc…	snoRNA binding; organic cyclic compound binding; heterocyclic compound binding; RNA binding; binding; nucleic acid binding;	K14564	NOP56; nucleolar protein 56	hsa03008 Ribosome biogenesis in eukaryotes - Homo sapiens (human);	IPR002687; IPR012974; IPR012976;	NOP5, N-terminal; NOSIC; Nop domain;	Nop56p-associated pre-rRNA complex;
O00567	520	S	Nucleolar protein 56	NOP56	0.902	0.873	0.886	1.023	1.014	1.027	0.88172	0.860947	0.862707	0.868458	0.00435774	......SD.E...	KEELMSSDLEETA	nucl	rRNA metabolic process; RNA processing; ncRNA processing; cellular component biogenesis; ribonucleoprotein complex biogenesis; cellular aromatic compound metabolic process; death; single-organism cellular process; nitrogen compound metabolic process; organic cyclic compound metabolic process; ribosome biogenesis; single-organism process; primary metabolic process; cellular metabolic process; orga…	intracellular organelle; intracellular non-membrane-bounded organelle; cytoplasm; intracellular organelle part; nuclear lumen; macromolecular complex; nucleolar part; intracellular part; nucleolus; cell; organelle part; pre-snoRNP complex; non-membrane-bounded organelle; membrane-enclosed lumen; intracellular membrane-bounded organelle; organelle; nucleus; intracellular organelle lumen; small nuc…	snoRNA binding; organic cyclic compound binding; heterocyclic compound binding; RNA binding; binding; nucleic acid binding;	K14564	NOP56; nucleolar protein 56	hsa03008 Ribosome biogenesis in eukaryotes - Homo sapiens (human);	IPR002687; IPR012974; IPR012976;	NOP5, N-terminal; NOSIC; Nop domain;	Nop56p-associated pre-rRNA complex;
O00571	69	Y	ATP-dependent RNA helicase DDX3X	DDX3X				0.921	0.938	0.945							#N/A	nucl	cellular component biogenesis; single organism signaling; positive regulation of type I interferon production; regulation of biological quality; regulation of cell death; ribonucleoprotein complex biogenesis; positive regulation of cellular protein metabolic process; ribonucleoprotein complex assembly; cell surface receptor signaling pathway; posttranscriptional regulation of gene expression; pos…	membrane; outer membrane; organelle membrane; cytoplasm; macromolecular complex; intracellular part; nuclear body; cell; organelle part; non-membrane-bounded organelle; membrane-enclosed lumen; mitochondrial envelope; nucleoplasm; intracellular organelle lumen; nuclear speck; intracellular; cell part; organelle outer membrane; membrane-bounded organelle; nucleoplasm part; organelle lumen; intrace…	mRNA 5'-UTR binding; nucleoside phosphate binding; ATP-dependent helicase activity; hydrolase activity, acting on acid anhydrides; protein binding; hydrolase activity; ATPase activity; organic cyclic compound binding; heterocyclic compound binding; mRNA binding; pyrophosphatase activity; ribosomal small subunit binding; catalytic activity; ribonucleotide binding; translation initiation factor bin…	K11594	DDX3X; ATP-dependent RNA helicase DDX3X [EC:3.6.4.13]	hsa04622 RIG-I-like receptor signaling pathway - Homo sapiens (human); hsa05161 Hepatitis B - Homo sapiens (human); hsa05203 Viral carcinogenesis - Homo sapiens (human);	IPR014014; IPR011545; IPR014001; IPR027417; IPR001650;	Helicase, C-terminal; Helicase, superfamily 1/2, ATP-binding domain; RNA helicase, DEAD-box type, Q motif; DNA/RNA helicase, DEAD/DEAH box type, N-terminal; P-loop containing nucleoside triphosphate hydrolase;	TNF-alpha/Nf-kappa B signaling complex; Large Drosha complex; Spliceosome;
O00571	82	S	ATP-dependent RNA helicase DDX3X	DDX3X		1.123		0.921	0.938	0.945		1.19723		1.19723		...R..S......	SDSRGKSSFFSDR	nucl	cellular component biogenesis; single organism signaling; positive regulation of type I interferon production; regulation of biological quality; regulation of cell death; ribonucleoprotein complex biogenesis; positive regulation of cellular protein metabolic process; ribonucleoprotein complex assembly; cell surface receptor signaling pathway; posttranscriptional regulation of gene expression; pos…	membrane; outer membrane; organelle membrane; cytoplasm; macromolecular complex; intracellular part; nuclear body; cell; organelle part; non-membrane-bounded organelle; membrane-enclosed lumen; mitochondrial envelope; nucleoplasm; intracellular organelle lumen; nuclear speck; intracellular; cell part; organelle outer membrane; membrane-bounded organelle; nucleoplasm part; organelle lumen; intrace…	mRNA 5'-UTR binding; nucleoside phosphate binding; ATP-dependent helicase activity; hydrolase activity, acting on acid anhydrides; protein binding; hydrolase activity; ATPase activity; organic cyclic compound binding; heterocyclic compound binding; mRNA binding; pyrophosphatase activity; ribosomal small subunit binding; catalytic activity; ribonucleotide binding; translation initiation factor bin…	K11594	DDX3X; ATP-dependent RNA helicase DDX3X [EC:3.6.4.13]	hsa04622 RIG-I-like receptor signaling pathway - Homo sapiens (human); hsa05161 Hepatitis B - Homo sapiens (human); hsa05203 Viral carcinogenesis - Homo sapiens (human);	IPR014014; IPR011545; IPR014001; IPR027417; IPR001650;	Helicase, C-terminal; Helicase, superfamily 1/2, ATP-binding domain; RNA helicase, DEAD-box type, Q motif; DNA/RNA helicase, DEAD/DEAH box type, N-terminal; P-loop containing nucleoside triphosphate hydrolase;	TNF-alpha/Nf-kappa B signaling complex; Large Drosha complex; Spliceosome;
O00571	83	S	ATP-dependent RNA helicase DDX3X	DDX3X		2.177		0.921	0.938	0.945		2.3209		2.3209		......SF.....	DSRGKSSFFSDRG	nucl	cellular component biogenesis; single organism signaling; positive regulation of type I interferon production; regulation of biological quality; regulation of cell death; ribonucleoprotein complex biogenesis; positive regulation of cellular protein metabolic process; ribonucleoprotein complex assembly; cell surface receptor signaling pathway; posttranscriptional regulation of gene expression; pos…	membrane; outer membrane; organelle membrane; cytoplasm; macromolecular complex; intracellular part; nuclear body; cell; organelle part; non-membrane-bounded organelle; membrane-enclosed lumen; mitochondrial envelope; nucleoplasm; intracellular organelle lumen; nuclear speck; intracellular; cell part; organelle outer membrane; membrane-bounded organelle; nucleoplasm part; organelle lumen; intrace…	mRNA 5'-UTR binding; nucleoside phosphate binding; ATP-dependent helicase activity; hydrolase activity, acting on acid anhydrides; protein binding; hydrolase activity; ATPase activity; organic cyclic compound binding; heterocyclic compound binding; mRNA binding; pyrophosphatase activity; ribosomal small subunit binding; catalytic activity; ribonucleotide binding; translation initiation factor bin…	K11594	DDX3X; ATP-dependent RNA helicase DDX3X [EC:3.6.4.13]	hsa04622 RIG-I-like receptor signaling pathway - Homo sapiens (human); hsa05161 Hepatitis B - Homo sapiens (human); hsa05203 Viral carcinogenesis - Homo sapiens (human);	IPR014014; IPR011545; IPR014001; IPR027417; IPR001650;	Helicase, C-terminal; Helicase, superfamily 1/2, ATP-binding domain; RNA helicase, DEAD-box type, Q motif; DNA/RNA helicase, DEAD/DEAH box type, N-terminal; P-loop containing nucleoside triphosphate hydrolase;	TNF-alpha/Nf-kappa B signaling complex; Large Drosha complex; Spliceosome;
O00571	86	S	ATP-dependent RNA helicase DDX3X	DDX3X			1.219	0.921	0.938	0.945			1.28995	1.28995		......SD.....	GKSSFFSDRGSGS	nucl	cellular component biogenesis; single organism signaling; positive regulation of type I interferon production; regulation of biological quality; regulation of cell death; ribonucleoprotein complex biogenesis; positive regulation of cellular protein metabolic process; ribonucleoprotein complex assembly; cell surface receptor signaling pathway; posttranscriptional regulation of gene expression; pos…	membrane; outer membrane; organelle membrane; cytoplasm; macromolecular complex; intracellular part; nuclear body; cell; organelle part; non-membrane-bounded organelle; membrane-enclosed lumen; mitochondrial envelope; nucleoplasm; intracellular organelle lumen; nuclear speck; intracellular; cell part; organelle outer membrane; membrane-bounded organelle; nucleoplasm part; organelle lumen; intrace…	mRNA 5'-UTR binding; nucleoside phosphate binding; ATP-dependent helicase activity; hydrolase activity, acting on acid anhydrides; protein binding; hydrolase activity; ATPase activity; organic cyclic compound binding; heterocyclic compound binding; mRNA binding; pyrophosphatase activity; ribosomal small subunit binding; catalytic activity; ribonucleotide binding; translation initiation factor bin…	K11594	DDX3X; ATP-dependent RNA helicase DDX3X [EC:3.6.4.13]	hsa04622 RIG-I-like receptor signaling pathway - Homo sapiens (human); hsa05161 Hepatitis B - Homo sapiens (human); hsa05203 Viral carcinogenesis - Homo sapiens (human);	IPR014014; IPR011545; IPR014001; IPR027417; IPR001650;	Helicase, C-terminal; Helicase, superfamily 1/2, ATP-binding domain; RNA helicase, DEAD-box type, Q motif; DNA/RNA helicase, DEAD/DEAH box type, N-terminal; P-loop containing nucleoside triphosphate hydrolase;	TNF-alpha/Nf-kappa B signaling complex; Large Drosha complex; Spliceosome;
O00571	90	S	ATP-dependent RNA helicase DDX3X	DDX3X	1.524	1.47	1.524	0.921	0.938	0.945	1.65472	1.56716	1.6127	1.61153	0.00162182	.....GS......	FFSDRGSGSRGRF	nucl	cellular component biogenesis; single organism signaling; positive regulation of type I interferon production; regulation of biological quality; regulation of cell death; ribonucleoprotein complex biogenesis; positive regulation of cellular protein metabolic process; ribonucleoprotein complex assembly; cell surface receptor signaling pathway; posttranscriptional regulation of gene expression; pos…	membrane; outer membrane; organelle membrane; cytoplasm; macromolecular complex; intracellular part; nuclear body; cell; organelle part; non-membrane-bounded organelle; membrane-enclosed lumen; mitochondrial envelope; nucleoplasm; intracellular organelle lumen; nuclear speck; intracellular; cell part; organelle outer membrane; membrane-bounded organelle; nucleoplasm part; organelle lumen; intrace…	mRNA 5'-UTR binding; nucleoside phosphate binding; ATP-dependent helicase activity; hydrolase activity, acting on acid anhydrides; protein binding; hydrolase activity; ATPase activity; organic cyclic compound binding; heterocyclic compound binding; mRNA binding; pyrophosphatase activity; ribosomal small subunit binding; catalytic activity; ribonucleotide binding; translation initiation factor bin…	K11594	DDX3X; ATP-dependent RNA helicase DDX3X [EC:3.6.4.13]	hsa04622 RIG-I-like receptor signaling pathway - Homo sapiens (human); hsa05161 Hepatitis B - Homo sapiens (human); hsa05203 Viral carcinogenesis - Homo sapiens (human);	IPR014014; IPR011545; IPR014001; IPR027417; IPR001650;	Helicase, C-terminal; Helicase, superfamily 1/2, ATP-binding domain; RNA helicase, DEAD-box type, Q motif; DNA/RNA helicase, DEAD/DEAH box type, N-terminal; P-loop containing nucleoside triphosphate hydrolase;	TNF-alpha/Nf-kappa B signaling complex; Large Drosha complex; Spliceosome;
O00571	102	S	ATP-dependent RNA helicase DDX3X	DDX3X		2.689		0.921	0.938	0.945		2.86674		2.86674		...R..S......	FDDRGRSDYDGIG	nucl	cellular component biogenesis; single organism signaling; positive regulation of type I interferon production; regulation of biological quality; regulation of cell death; ribonucleoprotein complex biogenesis; positive regulation of cellular protein metabolic process; ribonucleoprotein complex assembly; cell surface receptor signaling pathway; posttranscriptional regulation of gene expression; pos…	membrane; outer membrane; organelle membrane; cytoplasm; macromolecular complex; intracellular part; nuclear body; cell; organelle part; non-membrane-bounded organelle; membrane-enclosed lumen; mitochondrial envelope; nucleoplasm; intracellular organelle lumen; nuclear speck; intracellular; cell part; organelle outer membrane; membrane-bounded organelle; nucleoplasm part; organelle lumen; intrace…	mRNA 5'-UTR binding; nucleoside phosphate binding; ATP-dependent helicase activity; hydrolase activity, acting on acid anhydrides; protein binding; hydrolase activity; ATPase activity; organic cyclic compound binding; heterocyclic compound binding; mRNA binding; pyrophosphatase activity; ribosomal small subunit binding; catalytic activity; ribonucleotide binding; translation initiation factor bin…	K11594	DDX3X; ATP-dependent RNA helicase DDX3X [EC:3.6.4.13]	hsa04622 RIG-I-like receptor signaling pathway - Homo sapiens (human); hsa05161 Hepatitis B - Homo sapiens (human); hsa05203 Viral carcinogenesis - Homo sapiens (human);	IPR014014; IPR011545; IPR014001; IPR027417; IPR001650;	Helicase, C-terminal; Helicase, superfamily 1/2, ATP-binding domain; RNA helicase, DEAD-box type, Q motif; DNA/RNA helicase, DEAD/DEAH box type, N-terminal; P-loop containing nucleoside triphosphate hydrolase;	TNF-alpha/Nf-kappa B signaling complex; Large Drosha complex; Spliceosome;
O00571	104	Y	ATP-dependent RNA helicase DDX3X	DDX3X			2.381	0.921	0.938	0.945			2.51958	2.51958			#N/A	nucl	cellular component biogenesis; single organism signaling; positive regulation of type I interferon production; regulation of biological quality; regulation of cell death; ribonucleoprotein complex biogenesis; positive regulation of cellular protein metabolic process; ribonucleoprotein complex assembly; cell surface receptor signaling pathway; posttranscriptional regulation of gene expression; pos…	membrane; outer membrane; organelle membrane; cytoplasm; macromolecular complex; intracellular part; nuclear body; cell; organelle part; non-membrane-bounded organelle; membrane-enclosed lumen; mitochondrial envelope; nucleoplasm; intracellular organelle lumen; nuclear speck; intracellular; cell part; organelle outer membrane; membrane-bounded organelle; nucleoplasm part; organelle lumen; intrace…	mRNA 5'-UTR binding; nucleoside phosphate binding; ATP-dependent helicase activity; hydrolase activity, acting on acid anhydrides; protein binding; hydrolase activity; ATPase activity; organic cyclic compound binding; heterocyclic compound binding; mRNA binding; pyrophosphatase activity; ribosomal small subunit binding; catalytic activity; ribonucleotide binding; translation initiation factor bin…	K11594	DDX3X; ATP-dependent RNA helicase DDX3X [EC:3.6.4.13]	hsa04622 RIG-I-like receptor signaling pathway - Homo sapiens (human); hsa05161 Hepatitis B - Homo sapiens (human); hsa05203 Viral carcinogenesis - Homo sapiens (human);	IPR014014; IPR011545; IPR014001; IPR027417; IPR001650;	Helicase, C-terminal; Helicase, superfamily 1/2, ATP-binding domain; RNA helicase, DEAD-box type, Q motif; DNA/RNA helicase, DEAD/DEAH box type, N-terminal; P-loop containing nucleoside triphosphate hydrolase;	TNF-alpha/Nf-kappa B signaling complex; Large Drosha complex; Spliceosome;
O00571	266	Y	ATP-dependent RNA helicase DDX3X	DDX3X	1.274	1.216	1.25	0.921	0.938	0.945	1.38328	1.29638	1.32275	1.33414	0.006587		#N/A	nucl	cellular component biogenesis; single organism signaling; positive regulation of type I interferon production; regulation of biological quality; regulation of cell death; ribonucleoprotein complex biogenesis; positive regulation of cellular protein metabolic process; ribonucleoprotein complex assembly; cell surface receptor signaling pathway; posttranscriptional regulation of gene expression; pos…	membrane; outer membrane; organelle membrane; cytoplasm; macromolecular complex; intracellular part; nuclear body; cell; organelle part; non-membrane-bounded organelle; membrane-enclosed lumen; mitochondrial envelope; nucleoplasm; intracellular organelle lumen; nuclear speck; intracellular; cell part; organelle outer membrane; membrane-bounded organelle; nucleoplasm part; organelle lumen; intrace…	mRNA 5'-UTR binding; nucleoside phosphate binding; ATP-dependent helicase activity; hydrolase activity, acting on acid anhydrides; protein binding; hydrolase activity; ATPase activity; organic cyclic compound binding; heterocyclic compound binding; mRNA binding; pyrophosphatase activity; ribosomal small subunit binding; catalytic activity; ribonucleotide binding; translation initiation factor bin…	K11594	DDX3X; ATP-dependent RNA helicase DDX3X [EC:3.6.4.13]	hsa04622 RIG-I-like receptor signaling pathway - Homo sapiens (human); hsa05161 Hepatitis B - Homo sapiens (human); hsa05203 Viral carcinogenesis - Homo sapiens (human);	IPR014014; IPR011545; IPR014001; IPR027417; IPR001650;	Helicase, C-terminal; Helicase, superfamily 1/2, ATP-binding domain; RNA helicase, DEAD-box type, Q motif; DNA/RNA helicase, DEAD/DEAH box type, N-terminal; P-loop containing nucleoside triphosphate hydrolase;	TNF-alpha/Nf-kappa B signaling complex; Large Drosha complex; Spliceosome;
O00571	323	T	ATP-dependent RNA helicase DDX3X	DDX3X	0.405			0.921	0.938	0.945	0.439739			0.439739		......TP.....	CHLLVATPGRLVD	nucl	cellular component biogenesis; single organism signaling; positive regulation of type I interferon production; regulation of biological quality; regulation of cell death; ribonucleoprotein complex biogenesis; positive regulation of cellular protein metabolic process; ribonucleoprotein complex assembly; cell surface receptor signaling pathway; posttranscriptional regulation of gene expression; pos…	membrane; outer membrane; organelle membrane; cytoplasm; macromolecular complex; intracellular part; nuclear body; cell; organelle part; non-membrane-bounded organelle; membrane-enclosed lumen; mitochondrial envelope; nucleoplasm; intracellular organelle lumen; nuclear speck; intracellular; cell part; organelle outer membrane; membrane-bounded organelle; nucleoplasm part; organelle lumen; intrace…	mRNA 5'-UTR binding; nucleoside phosphate binding; ATP-dependent helicase activity; hydrolase activity, acting on acid anhydrides; protein binding; hydrolase activity; ATPase activity; organic cyclic compound binding; heterocyclic compound binding; mRNA binding; pyrophosphatase activity; ribosomal small subunit binding; catalytic activity; ribonucleotide binding; translation initiation factor bin…	K11594	DDX3X; ATP-dependent RNA helicase DDX3X [EC:3.6.4.13]	hsa04622 RIG-I-like receptor signaling pathway - Homo sapiens (human); hsa05161 Hepatitis B - Homo sapiens (human); hsa05203 Viral carcinogenesis - Homo sapiens (human);	IPR014014; IPR011545; IPR014001; IPR027417; IPR001650;	Helicase, C-terminal; Helicase, superfamily 1/2, ATP-binding domain; RNA helicase, DEAD-box type, Q motif; DNA/RNA helicase, DEAD/DEAH box type, N-terminal; P-loop containing nucleoside triphosphate hydrolase;	TNF-alpha/Nf-kappa B signaling complex; Large Drosha complex; Spliceosome;
O00571	594	S	ATP-dependent RNA helicase DDX3X	DDX3X	1.764	1.705	1.847	0.921	0.938	0.945	1.91531	1.8177	1.9545	1.89583	0.00171129	....R.S......	SKSSRFSGGFGAR	nucl	cellular component biogenesis; single organism signaling; positive regulation of type I interferon production; regulation of biological quality; regulation of cell death; ribonucleoprotein complex biogenesis; positive regulation of cellular protein metabolic process; ribonucleoprotein complex assembly; cell surface receptor signaling pathway; posttranscriptional regulation of gene expression; pos…	membrane; outer membrane; organelle membrane; cytoplasm; macromolecular complex; intracellular part; nuclear body; cell; organelle part; non-membrane-bounded organelle; membrane-enclosed lumen; mitochondrial envelope; nucleoplasm; intracellular organelle lumen; nuclear speck; intracellular; cell part; organelle outer membrane; membrane-bounded organelle; nucleoplasm part; organelle lumen; intrace…	mRNA 5'-UTR binding; nucleoside phosphate binding; ATP-dependent helicase activity; hydrolase activity, acting on acid anhydrides; protein binding; hydrolase activity; ATPase activity; organic cyclic compound binding; heterocyclic compound binding; mRNA binding; pyrophosphatase activity; ribosomal small subunit binding; catalytic activity; ribonucleotide binding; translation initiation factor bin…	K11594	DDX3X; ATP-dependent RNA helicase DDX3X [EC:3.6.4.13]	hsa04622 RIG-I-like receptor signaling pathway - Homo sapiens (human); hsa05161 Hepatitis B - Homo sapiens (human); hsa05203 Viral carcinogenesis - Homo sapiens (human);	IPR014014; IPR011545; IPR014001; IPR027417; IPR001650;	Helicase, C-terminal; Helicase, superfamily 1/2, ATP-binding domain; RNA helicase, DEAD-box type, Q motif; DNA/RNA helicase, DEAD/DEAH box type, N-terminal; P-loop containing nucleoside triphosphate hydrolase;	TNF-alpha/Nf-kappa B signaling complex; Large Drosha complex; Spliceosome;
O00571	606	S	ATP-dependent RNA helicase DDX3X	DDX3X			2.537	0.921	0.938	0.945			2.68466	2.68466		...R..S......	RDYRQSSGASSSS	nucl	cellular component biogenesis; single organism signaling; positive regulation of type I interferon production; regulation of biological quality; regulation of cell death; ribonucleoprotein complex biogenesis; positive regulation of cellular protein metabolic process; ribonucleoprotein complex assembly; cell surface receptor signaling pathway; posttranscriptional regulation of gene expression; pos…	membrane; outer membrane; organelle membrane; cytoplasm; macromolecular complex; intracellular part; nuclear body; cell; organelle part; non-membrane-bounded organelle; membrane-enclosed lumen; mitochondrial envelope; nucleoplasm; intracellular organelle lumen; nuclear speck; intracellular; cell part; organelle outer membrane; membrane-bounded organelle; nucleoplasm part; organelle lumen; intrace…	mRNA 5'-UTR binding; nucleoside phosphate binding; ATP-dependent helicase activity; hydrolase activity, acting on acid anhydrides; protein binding; hydrolase activity; ATPase activity; organic cyclic compound binding; heterocyclic compound binding; mRNA binding; pyrophosphatase activity; ribosomal small subunit binding; catalytic activity; ribonucleotide binding; translation initiation factor bin…	K11594	DDX3X; ATP-dependent RNA helicase DDX3X [EC:3.6.4.13]	hsa04622 RIG-I-like receptor signaling pathway - Homo sapiens (human); hsa05161 Hepatitis B - Homo sapiens (human); hsa05203 Viral carcinogenesis - Homo sapiens (human);	IPR014014; IPR011545; IPR014001; IPR027417; IPR001650;	Helicase, C-terminal; Helicase, superfamily 1/2, ATP-binding domain; RNA helicase, DEAD-box type, Q motif; DNA/RNA helicase, DEAD/DEAH box type, N-terminal; P-loop containing nucleoside triphosphate hydrolase;	TNF-alpha/Nf-kappa B signaling complex; Large Drosha complex; Spliceosome;
O00629	60	S	Importin subunit alpha-3	KPNA4	1.061	1.051	1.018	1.095	1.136	1.112	0.96895	0.925176	0.915468	0.936531	0.090964	......SD.....	EDICEDSDIDGDY	cyto	regulation of cellular process; single organism signaling; intracellular transport; NLS-bearing substrate import into nucleus; establishment of protein localization to organelle; cell surface receptor signaling pathway; protein import; cellular response to organic substance; single-organism process; nuclear transport; response to stimulus; cellular response to cytokine stimulus; protein transport…	intracellular organelle; intracellular organelle part; cytoplasm; nuclear lumen; intracellular part; cytosol; cell; organelle part; organelle; intracellular membrane-bounded organelle; membrane-enclosed lumen; nucleoplasm; nucleus; intracellular organelle lumen; intracellular; cell part; membrane-bounded organelle; organelle lumen; cytoplasmic part; nuclear part;	substrate-specific transporter activity; protein transporter activity; transporter activity;				IPR002652; IPR011989; IPR016024;	Armadillo-type fold; Armadillo-like helical; Importin-alpha, importin-beta-binding domain;
O00712	265	S	Nuclear factor 1 B-type	NFIB			0.67		0.758	0.708			0.946328	0.946328		......SP...K.	LQRSLSSPPSSKR	nucl	respiratory tube development; brain development; positive regulation of biosynthetic process; cellular component morphogenesis; cellular metabolic process; negative regulation of cell proliferation; neural nucleus development; telencephalon development; response to external stimulus; metabolic process; regulation of epithelial cell proliferation; regulation of mesenchymal cell proliferation invol…	intracellular organelle; cell projection; intracellular non-membrane-bounded organelle; intracellular organelle part; nuclear lumen; intracellular part; nucleolus; cerebellar mossy fiber; cell; organelle part; non-membrane-bounded organelle; membrane-enclosed lumen; intracellular membrane-bounded organelle; axon; organelle; nucleus; intracellular organelle lumen; intracellular; cell part; neuron …	sequence-specific DNA binding RNA polymerase II transcription factor activity; DNA binding; transcription corepressor activity; transcription cofactor activity; sequence-specific DNA binding transcription factor activity; heterocyclic compound binding; organic cyclic compound binding; RNA polymerase II transcription cofactor activity; RNA polymerase II transcription factor binding transcription f…	K09169			IPR019548; IPR003619; IPR020604;	CTF transcription factor/nuclear factor 1, DNA-binding domain; MAD homology 1, Dwarfin-type; CTF transcription factor/nuclear factor 1, N-terminal;
O00712	328	S	Nuclear factor 1 B-type	NFIB	1.245				0.758	0.708						......SP.....	PLFSSASPQDSSP	nucl	respiratory tube development; brain development; positive regulation of biosynthetic process; cellular component morphogenesis; cellular metabolic process; negative regulation of cell proliferation; neural nucleus development; telencephalon development; response to external stimulus; metabolic process; regulation of epithelial cell proliferation; regulation of mesenchymal cell proliferation invol…	intracellular organelle; cell projection; intracellular non-membrane-bounded organelle; intracellular organelle part; nuclear lumen; intracellular part; nucleolus; cerebellar mossy fiber; cell; organelle part; non-membrane-bounded organelle; membrane-enclosed lumen; intracellular membrane-bounded organelle; axon; organelle; nucleus; intracellular organelle lumen; intracellular; cell part; neuron …	sequence-specific DNA binding RNA polymerase II transcription factor activity; DNA binding; transcription corepressor activity; transcription cofactor activity; sequence-specific DNA binding transcription factor activity; heterocyclic compound binding; organic cyclic compound binding; RNA polymerase II transcription cofactor activity; RNA polymerase II transcription factor binding transcription f…	K09169			IPR019548; IPR003619; IPR020604;	CTF transcription factor/nuclear factor 1, DNA-binding domain; MAD homology 1, Dwarfin-type; CTF transcription factor/nuclear factor 1, N-terminal;
O00750	155	S	Phosphatidylinositol 4-phosphate 3-kinase C2 domain-containing subunit beta	PIK3C2B		2.475										......SP.....	GSCKKLSPPPLPP	nucl	regulation of cellular process; single organism signaling; glycerolipid metabolic process; protein kinase B signaling cascade; phosphatidylinositol biosynthetic process; phospholipid biosynthetic process; single-organism process; biosynthetic process; cellular lipid metabolic process; response to stimulus; cellular metabolic process; phosphate-containing compound metabolic process; organic substa…	membrane; intracellular organelle; endoplasmic reticulum; cytoplasmic vesicle; cell periphery; membrane-bounded vesicle; cytoplasmic membrane-bounded vesicle; vesicle; cytoplasm; intracellular part; cytosol; cell; plasma membrane; organelle; intracellular membrane-bounded organelle; nucleus; intracellular; cell part; endocytic vesicle; membrane-bounded organelle; cytoplasmic part;	nucleoside phosphate binding; phosphotransferase activity, alcohol group as acceptor; organic cyclic compound binding; heterocyclic compound binding; kinase activity; ribonucleotide binding; catalytic activity; binding; phosphatidylinositol binding; purine ribonucleoside binding; lipid binding; anion binding; adenyl ribonucleotide binding; adenyl nucleotide binding; 1-phosphatidylinositol-4-phosp…	K00923	PIK3C2; phosphatidylinositol-4-phosphate 3-kinase [EC:2.7.1.154]	hsa00562 Inositol phosphate metabolism - Homo sapiens (human); hsa01100 Metabolic pathways - Homo sapiens (human); hsa04070 Phosphatidylinositol signaling system - Homo sapiens (human);	IPR000403; IPR001263; IPR002420; IPR001683; IPR011009; IPR016024; IPR000008; IPR000341;	Phosphatidylinositol 3-kinase Ras-binding (PI3K RBD) domain; Phosphoinositide 3-kinase, accessory (PIK) domain; Armadillo-type fold; Phosphatidylinositol 3-/4-kinase, catalytic domain; Phosphatidylinositol 3-kinase, C2 domain; Protein kinase-like domain; C2 domain; Phox homologous domain;	EGFR-containing signaling complex;
O00767	173	S	Acyl-CoA desaturase	SCD	1.029		1.066	0.896	0.883	0.987	1.14844		1.08004	1.11424			HADPHNSRRGFFF	cyto	organic acid biosynthetic process; single-organism biosynthetic process; small molecule metabolic process; biosynthetic process; cellular lipid metabolic process; fatty acid metabolic process; primary metabolic process; cellular metabolic process; organic substance biosynthetic process; fatty acid biosynthetic process; cellular biosynthetic process; organic substance metabolic process; lipid bios…	membrane; intracellular organelle; nuclear outer membrane-endoplasmic reticulum membrane network; endoplasmic reticulum; organelle membrane; intracellular organelle part; cytoplasm; intrinsic to membrane; endomembrane system; intracellular part; cell; integral to membrane; organelle part; intracellular membrane-bounded organelle; organelle; endoplasmic reticulum part; membrane part; intracellular…	iron ion binding; transition metal ion binding; stearoyl-CoA 9-desaturase activity; catalytic activity; acyl-CoA desaturase activity; binding; oxidoreductase activity, acting on paired donors, with oxidation of a pair of donors resulting in the reduction of molecular oxygen to two molecules of water; ion binding; metal ion binding; cation binding; oxidoreductase activity, acting on paired donors,…	K00507	SCD; stearoyl-CoA desaturase (delta-9 desaturase) [EC:1.14.19.1]	hsa03320 PPAR signaling pathway - Homo sapiens (human); hsa01040 Biosynthesis of unsaturated fatty acids - Homo sapiens (human); hsa01212 Fatty acid metabolism - Homo sapiens (human); hsa04152 AMPK signaling pathway - Homo sapiens (human);	IPR005804;	Fatty acid desaturase, type 1;
O00767	198	S	Acyl-CoA desaturase	SCD	0.916	0.906	0.751	0.896	0.883	0.987	1.02232	1.02605	0.760892	0.93642	0.598759	.....GS......	AVKEKGSTLDLSD	cyto	organic acid biosynthetic process; single-organism biosynthetic process; small molecule metabolic process; biosynthetic process; cellular lipid metabolic process; fatty acid metabolic process; primary metabolic process; cellular metabolic process; organic substance biosynthetic process; fatty acid biosynthetic process; cellular biosynthetic process; organic substance metabolic process; lipid bios…	membrane; intracellular organelle; nuclear outer membrane-endoplasmic reticulum membrane network; endoplasmic reticulum; organelle membrane; intracellular organelle part; cytoplasm; intrinsic to membrane; endomembrane system; intracellular part; cell; integral to membrane; organelle part; intracellular membrane-bounded organelle; organelle; endoplasmic reticulum part; membrane part; intracellular…	iron ion binding; transition metal ion binding; stearoyl-CoA 9-desaturase activity; catalytic activity; acyl-CoA desaturase activity; binding; oxidoreductase activity, acting on paired donors, with oxidation of a pair of donors resulting in the reduction of molecular oxygen to two molecules of water; ion binding; metal ion binding; cation binding; oxidoreductase activity, acting on paired donors,…	K00507	SCD; stearoyl-CoA desaturase (delta-9 desaturase) [EC:1.14.19.1]	hsa03320 PPAR signaling pathway - Homo sapiens (human); hsa01040 Biosynthesis of unsaturated fatty acids - Homo sapiens (human); hsa01212 Fatty acid metabolism - Homo sapiens (human); hsa04152 AMPK signaling pathway - Homo sapiens (human);	IPR005804;	Fatty acid desaturase, type 1;
O00767	199	T	Acyl-CoA desaturase	SCD	0.865	0.88	0.844	0.896	0.883	0.987	0.965402	0.996602	0.855117	0.93904	0.372929		VKEKGSTLDLSDL	cyto	organic acid biosynthetic process; single-organism biosynthetic process; small molecule metabolic process; biosynthetic process; cellular lipid metabolic process; fatty acid metabolic process; primary metabolic process; cellular metabolic process; organic substance biosynthetic process; fatty acid biosynthetic process; cellular biosynthetic process; organic substance metabolic process; lipid bios…	membrane; intracellular organelle; nuclear outer membrane-endoplasmic reticulum membrane network; endoplasmic reticulum; organelle membrane; intracellular organelle part; cytoplasm; intrinsic to membrane; endomembrane system; intracellular part; cell; integral to membrane; organelle part; intracellular membrane-bounded organelle; organelle; endoplasmic reticulum part; membrane part; intracellular…	iron ion binding; transition metal ion binding; stearoyl-CoA 9-desaturase activity; catalytic activity; acyl-CoA desaturase activity; binding; oxidoreductase activity, acting on paired donors, with oxidation of a pair of donors resulting in the reduction of molecular oxygen to two molecules of water; ion binding; metal ion binding; cation binding; oxidoreductase activity, acting on paired donors,…	K00507	SCD; stearoyl-CoA desaturase (delta-9 desaturase) [EC:1.14.19.1]	hsa03320 PPAR signaling pathway - Homo sapiens (human); hsa01040 Biosynthesis of unsaturated fatty acids - Homo sapiens (human); hsa01212 Fatty acid metabolism - Homo sapiens (human); hsa04152 AMPK signaling pathway - Homo sapiens (human);	IPR005804;	Fatty acid desaturase, type 1;
O00767	203	S	Acyl-CoA desaturase	SCD		1.047		0.896	0.883	0.987		1.18573		1.18573		......SD.E...	GSTLDLSDLEAEK	cyto	organic acid biosynthetic process; single-organism biosynthetic process; small molecule metabolic process; biosynthetic process; cellular lipid metabolic process; fatty acid metabolic process; primary metabolic process; cellular metabolic process; organic substance biosynthetic process; fatty acid biosynthetic process; cellular biosynthetic process; organic substance metabolic process; lipid bios…	membrane; intracellular organelle; nuclear outer membrane-endoplasmic reticulum membrane network; endoplasmic reticulum; organelle membrane; intracellular organelle part; cytoplasm; intrinsic to membrane; endomembrane system; intracellular part; cell; integral to membrane; organelle part; intracellular membrane-bounded organelle; organelle; endoplasmic reticulum part; membrane part; intracellular…	iron ion binding; transition metal ion binding; stearoyl-CoA 9-desaturase activity; catalytic activity; acyl-CoA desaturase activity; binding; oxidoreductase activity, acting on paired donors, with oxidation of a pair of donors resulting in the reduction of molecular oxygen to two molecules of water; ion binding; metal ion binding; cation binding; oxidoreductase activity, acting on paired donors,…	K00507	SCD; stearoyl-CoA desaturase (delta-9 desaturase) [EC:1.14.19.1]	hsa03320 PPAR signaling pathway - Homo sapiens (human); hsa01040 Biosynthesis of unsaturated fatty acids - Homo sapiens (human); hsa01212 Fatty acid metabolism - Homo sapiens (human); hsa04152 AMPK signaling pathway - Homo sapiens (human);	IPR005804;	Fatty acid desaturase, type 1;
O14495	297	S	Lipid phosphate phosphohydrolase 3	PPAP2B	3.768											..K...SP.....	IRKEILSPVDIID	plas	single organism signaling; regulation of biological quality; positive regulation of cell migration; positive regulation of cellular protein metabolic process; reproductive process; cell surface receptor signaling pathway; posttranscriptional regulation of gene expression; germ cell migration; cellular lipid metabolic process; cellular metabolic process; regulation of endothelial cell migration; l…	membrane; intracellular organelle; cell periphery; cell junction; cytoplasm; anchoring junction; intrinsic to membrane; intracellular part; cell; integral to membrane; plasma membrane; intracellular membrane-bounded organelle; organelle; membrane part; intracellular; cell part; adherens junction; Golgi apparatus; membrane-bounded organelle; cytoplasmic part;	catalytic activity; phosphoric ester hydrolase activity; phosphatase activity; hydrolase activity, acting on ester bonds; lipid phosphatase activity; hydrolase activity; phosphoprotein phosphatase activity; phosphatidate phosphatase activity;	K01080	PPAP2; phosphatidate phosphatase [EC:3.1.3.4]	hsa04975 Fat digestion and absorption - Homo sapiens (human); hsa04666 Fc gamma R-mediated phagocytosis - Homo sapiens (human); hsa00564 Glycerophospholipid metabolism - Homo sapiens (human); hsa01100 Metabolic pathways - Homo sapiens (human); hsa00600 Sphingolipid metabolism - Homo sapiens (human); hsa00561 Glycerolipid metabolism - Homo sapiens (human); hsa00565 Ether lipid metabolism - Homo sa…			ITGAV-ITGB3-PPAP2b complex;
O14497	363	S	AT-rich interactive domain-containing protein 1A	ARID1A	1.449	1.432	1.432	1.211	1.034	0.98	1.19653	1.38491	1.46122	1.34756	0.056404	....P.SP.....	SHHAPMSPGSSGG	cyto	single organism signaling; positive regulation of biosynthetic process; single-organism process; biosynthetic process; cellular metabolic process; protein complex disassembly; intracellular estrogen receptor signaling pathway; regulation of RNA biosynthetic process; metabolic process; signal transduction; chromatin-mediated maintenance of transcription; cell communication; positive regulation of …	intracellular organelle; intracellular non-membrane-bounded organelle; intracellular organelle part; nuclear lumen; macromolecular complex; intracellular part; cell; SWI/SNF superfamily-type complex; organelle part; nBAF complex; chromosomal part; non-membrane-bounded organelle; membrane-enclosed lumen; intracellular membrane-bounded organelle; organelle; nucleus; intracellular organelle lumen; c…	transcription factor binding transcription factor activity; organic cyclic compound binding; heterocyclic compound binding; DNA binding; transcription coactivator activity; transcription cofactor activity; protein binding transcription factor activity; binding; nucleic acid binding;	K11653			IPR016024; IPR001606;	ARID/BRIGHT DNA-binding domain; Armadillo-type fold;	SIN3-ING1b complex II; Brm-associated complex; p300-CBP-p270 complex; BRM-SIN3A complex; BRG1-SIN3A-HDAC containing SWI/SNF remodeling complex I; EBAFa complex; LARC complex; SWI-SNF chromatin remodeling-related-BRCA1 complex; BRG1-SIN3A complex; BRG1-associated complex; WINAC complex; BRM-associated complex; NUMAC complex; p300-CBP-p270-SWI/SNF complex; BRM-SIN3A-HDAC complex; BAF complex; Brg1-…
O14497	696	S	AT-rich interactive domain-containing protein 1A	ARID1A	1.318	1.252	1.322	1.211	1.034	0.98	1.08836	1.21083	1.34898	1.21606	0.12739	...R..SP.....	PGIRGPSPSPVGS	cyto	single organism signaling; positive regulation of biosynthetic process; single-organism process; biosynthetic process; cellular metabolic process; protein complex disassembly; intracellular estrogen receptor signaling pathway; regulation of RNA biosynthetic process; metabolic process; signal transduction; chromatin-mediated maintenance of transcription; cell communication; positive regulation of …	intracellular organelle; intracellular non-membrane-bounded organelle; intracellular organelle part; nuclear lumen; macromolecular complex; intracellular part; cell; SWI/SNF superfamily-type complex; organelle part; nBAF complex; chromosomal part; non-membrane-bounded organelle; membrane-enclosed lumen; intracellular membrane-bounded organelle; organelle; nucleus; intracellular organelle lumen; c…	transcription factor binding transcription factor activity; organic cyclic compound binding; heterocyclic compound binding; DNA binding; transcription coactivator activity; transcription cofactor activity; protein binding transcription factor activity; binding; nucleic acid binding;	K11653			IPR016024; IPR001606;	ARID/BRIGHT DNA-binding domain; Armadillo-type fold;	SIN3-ING1b complex II; Brm-associated complex; p300-CBP-p270 complex; BRM-SIN3A complex; BRG1-SIN3A-HDAC containing SWI/SNF remodeling complex I; EBAFa complex; LARC complex; SWI-SNF chromatin remodeling-related-BRCA1 complex; BRG1-SIN3A complex; BRG1-associated complex; WINAC complex; BRM-associated complex; NUMAC complex; p300-CBP-p270-SWI/SNF complex; BRM-SIN3A-HDAC complex; BAF complex; Brg1-…
O14497	772	S	AT-rich interactive domain-containing protein 1A	ARID1A	1.495		1.61	1.211	1.034	0.98	1.23452		1.64286	1.43869		......SP.....	QPGSALSPRQPSG	cyto	single organism signaling; positive regulation of biosynthetic process; single-organism process; biosynthetic process; cellular metabolic process; protein complex disassembly; intracellular estrogen receptor signaling pathway; regulation of RNA biosynthetic process; metabolic process; signal transduction; chromatin-mediated maintenance of transcription; cell communication; positive regulation of …	intracellular organelle; intracellular non-membrane-bounded organelle; intracellular organelle part; nuclear lumen; macromolecular complex; intracellular part; cell; SWI/SNF superfamily-type complex; organelle part; nBAF complex; chromosomal part; non-membrane-bounded organelle; membrane-enclosed lumen; intracellular membrane-bounded organelle; organelle; nucleus; intracellular organelle lumen; c…	transcription factor binding transcription factor activity; organic cyclic compound binding; heterocyclic compound binding; DNA binding; transcription coactivator activity; transcription cofactor activity; protein binding transcription factor activity; binding; nucleic acid binding;	K11653			IPR016024; IPR001606;	ARID/BRIGHT DNA-binding domain; Armadillo-type fold;	SIN3-ING1b complex II; Brm-associated complex; p300-CBP-p270 complex; BRM-SIN3A complex; BRG1-SIN3A-HDAC containing SWI/SNF remodeling complex I; EBAFa complex; LARC complex; SWI-SNF chromatin remodeling-related-BRCA1 complex; BRG1-SIN3A complex; BRG1-associated complex; WINAC complex; BRM-associated complex; NUMAC complex; p300-CBP-p270-SWI/SNF complex; BRM-SIN3A-HDAC complex; BAF complex; Brg1-…
O14497	1184	S	AT-rich interactive domain-containing protein 1A	ARID1A	1.942	1.436	1.715	1.211	1.034	0.98	1.60363	1.38878	1.75	1.5808	0.0315799	...RS.S......	GMSRSNSVGIQDA	cyto	single organism signaling; positive regulation of biosynthetic process; single-organism process; biosynthetic process; cellular metabolic process; protein complex disassembly; intracellular estrogen receptor signaling pathway; regulation of RNA biosynthetic process; metabolic process; signal transduction; chromatin-mediated maintenance of transcription; cell communication; positive regulation of …	intracellular organelle; intracellular non-membrane-bounded organelle; intracellular organelle part; nuclear lumen; macromolecular complex; intracellular part; cell; SWI/SNF superfamily-type complex; organelle part; nBAF complex; chromosomal part; non-membrane-bounded organelle; membrane-enclosed lumen; intracellular membrane-bounded organelle; organelle; nucleus; intracellular organelle lumen; c…	transcription factor binding transcription factor activity; organic cyclic compound binding; heterocyclic compound binding; DNA binding; transcription coactivator activity; transcription cofactor activity; protein binding transcription factor activity; binding; nucleic acid binding;	K11653			IPR016024; IPR001606;	ARID/BRIGHT DNA-binding domain; Armadillo-type fold;	SIN3-ING1b complex II; Brm-associated complex; p300-CBP-p270 complex; BRM-SIN3A complex; BRG1-SIN3A-HDAC containing SWI/SNF remodeling complex I; EBAFa complex; LARC complex; SWI-SNF chromatin remodeling-related-BRCA1 complex; BRG1-SIN3A complex; BRG1-associated complex; WINAC complex; BRM-associated complex; NUMAC complex; p300-CBP-p270-SWI/SNF complex; BRM-SIN3A-HDAC complex; BAF complex; Brg1-…
O14497	1751	S	AT-rich interactive domain-containing protein 1A	ARID1A	1.036	1.059	1.093	1.211	1.034	0.98	0.855491	1.02418	1.11531	0.998325	0.943319	....R.S......	LDPGRFSKVSSPA	cyto	single organism signaling; positive regulation of biosynthetic process; single-organism process; biosynthetic process; cellular metabolic process; protein complex disassembly; intracellular estrogen receptor signaling pathway; regulation of RNA biosynthetic process; metabolic process; signal transduction; chromatin-mediated maintenance of transcription; cell communication; positive regulation of …	intracellular organelle; intracellular non-membrane-bounded organelle; intracellular organelle part; nuclear lumen; macromolecular complex; intracellular part; cell; SWI/SNF superfamily-type complex; organelle part; nBAF complex; chromosomal part; non-membrane-bounded organelle; membrane-enclosed lumen; intracellular membrane-bounded organelle; organelle; nucleus; intracellular organelle lumen; c…	transcription factor binding transcription factor activity; organic cyclic compound binding; heterocyclic compound binding; DNA binding; transcription coactivator activity; transcription cofactor activity; protein binding transcription factor activity; binding; nucleic acid binding;	K11653			IPR016024; IPR001606;	ARID/BRIGHT DNA-binding domain; Armadillo-type fold;	SIN3-ING1b complex II; Brm-associated complex; p300-CBP-p270 complex; BRM-SIN3A complex; BRG1-SIN3A-HDAC containing SWI/SNF remodeling complex I; EBAFa complex; LARC complex; SWI-SNF chromatin remodeling-related-BRCA1 complex; BRG1-SIN3A complex; BRG1-associated complex; WINAC complex; BRM-associated complex; NUMAC complex; p300-CBP-p270-SWI/SNF complex; BRM-SIN3A-HDAC complex; BAF complex; Brg1-…
O14497	1755	S	AT-rich interactive domain-containing protein 1A	ARID1A	1.127	1.043	1.053	1.211	1.034	0.98	0.930636	1.0087	1.07449	1.00461	0.960124	......SP.....	RFSKVSSPAPMEG	cyto	single organism signaling; positive regulation of biosynthetic process; single-organism process; biosynthetic process; cellular metabolic process; protein complex disassembly; intracellular estrogen receptor signaling pathway; regulation of RNA biosynthetic process; metabolic process; signal transduction; chromatin-mediated maintenance of transcription; cell communication; positive regulation of …	intracellular organelle; intracellular non-membrane-bounded organelle; intracellular organelle part; nuclear lumen; macromolecular complex; intracellular part; cell; SWI/SNF superfamily-type complex; organelle part; nBAF complex; chromosomal part; non-membrane-bounded organelle; membrane-enclosed lumen; intracellular membrane-bounded organelle; organelle; nucleus; intracellular organelle lumen; c…	transcription factor binding transcription factor activity; organic cyclic compound binding; heterocyclic compound binding; DNA binding; transcription coactivator activity; transcription cofactor activity; protein binding transcription factor activity; binding; nucleic acid binding;	K11653			IPR016024; IPR001606;	ARID/BRIGHT DNA-binding domain; Armadillo-type fold;	SIN3-ING1b complex II; Brm-associated complex; p300-CBP-p270 complex; BRM-SIN3A complex; BRG1-SIN3A-HDAC containing SWI/SNF remodeling complex I; EBAFa complex; LARC complex; SWI-SNF chromatin remodeling-related-BRCA1 complex; BRG1-SIN3A complex; BRG1-associated complex; WINAC complex; BRM-associated complex; NUMAC complex; p300-CBP-p270-SWI/SNF complex; BRM-SIN3A-HDAC complex; BAF complex; Brg1-…
O14513	1156	S	Nck-associated protein 5	NCKAP5	1.193	1.357	1.328									......SP...R.	LKVLMKSPQLLRK	nucl
O14513	1357	S	Nck-associated protein 5	NCKAP5		1.451										.....GS......	SLGSSGSFSSQHG	nucl
O14523	59	S	C2 domain-containing protein 2-like	C2CD2L					0.815							......SL.....	AGEPAGSLRELGV	extr		intrinsic to membrane; membrane; integral to membrane; membrane part;					IPR000008;	C2 domain;
O14544	311	S	Suppressor of cytokine signaling 6	SOCS6												....P.SP.....	DDVPPLSPLLPPM	nucl	regulation of T cell activation; regulation of cellular process; single organism signaling; regulation of leukocyte activation; proteolysis involved in cellular protein catabolic process; JAK-STAT cascade; regulation of growth; cellular protein catabolic process; negative regulation of lymphocyte activation; negative regulation of signal transduction; regulation of signaling; cellular protein met…	membrane; plasma membrane part; membrane part; cell periphery; cell part; intracellular; immunological synapse; cytoplasm; intracellular part; cell; plasma membrane;		K10322	SOCS6; suppressor of cytokine signaling 6	hsa04917 Prolactin signaling pathway - Homo sapiens (human);	IPR001496; IPR000980;	SOCS protein, C-terminal; SH2 domain;
O14545	327	S	TRAF-type zinc finger domain-containing protein 1	TRAFD1	1.151	0.83		0.919	0.846	1.069	1.25245	0.981087		1.11677		...G..SP.....	LNTGSSSPRGVEE	nucl	response to cytokine stimulus; response to organic substance; regulation of response to stress; negative regulation of biological process; negative regulation of response to stimulus; response to stimulus; regulation of defense response; regulation of immune response; negative regulation of immune system process; negative regulation of innate immune response; response to chemical stimulus; regula…	cell; intracellular; cell part;	cation binding; metal ion binding; zinc ion binding; transition metal ion binding; binding; ion binding;				IPR015880;	Zinc finger, C2H2-like;
O14545	414	T	TRAF-type zinc finger domain-containing protein 1	TRAFD1	1.488			0.919	0.846	1.069	1.61915			1.61915			DSQPQETSPELPR	nucl	response to cytokine stimulus; response to organic substance; regulation of response to stress; negative regulation of biological process; negative regulation of response to stimulus; response to stimulus; regulation of defense response; regulation of immune response; negative regulation of immune system process; negative regulation of innate immune response; response to chemical stimulus; regula…	cell; intracellular; cell part;	cation binding; metal ion binding; zinc ion binding; transition metal ion binding; binding; ion binding;				IPR015880;	Zinc finger, C2H2-like;
O14545	415	S	TRAF-type zinc finger domain-containing protein 1	TRAFD1	1.207	1.128	1.118	0.919	0.846	1.069	1.31338	1.33333	1.04584	1.23085	0.17101	......SP...R.	SQPQETSPELPRR	nucl	response to cytokine stimulus; response to organic substance; regulation of response to stress; negative regulation of biological process; negative regulation of response to stimulus; response to stimulus; regulation of defense response; regulation of immune response; negative regulation of immune system process; negative regulation of innate immune response; response to chemical stimulus; regula…	cell; intracellular; cell part;	cation binding; metal ion binding; zinc ion binding; transition metal ion binding; binding; ion binding;				IPR015880;	Zinc finger, C2H2-like;
O14578	440	S	Citron Rho-interacting kinase	CIT	1.638		1.625	1.145	1.033	1.137	1.43057		1.4292	1.42988		......SP.K...	VVSGLDSPAKTSS	nucl	single organism signaling; negative regulation of developmental process; reproductive process; negative regulation of cellular component organization; mitosis; neuron development; cellular developmental process; neurogenesis; single-organism process; sister chromatid segregation; signal transduction; negative regulation of dendrite morphogenesis; cell communication; single organism reproductive p…	cell leading edge; intracellular organelle; cell projection; intracellular non-membrane-bounded organelle; cytoplasm; intracellular part; cell; actin cytoskeleton; non-membrane-bounded organelle; cytoskeleton; organelle; intracellular membrane-bounded organelle; intracellular; cell part; vacuole; ruffle; membrane-bounded organelle; cytoplasmic part;	nucleoside phosphate binding; phosphotransferase activity, alcohol group as acceptor; nucleoside-triphosphatase regulator activity; GTPase regulator activity; protein kinase activity; organic cyclic compound binding; heterocyclic compound binding; kinase activity; catalytic activity; ribonucleotide binding; binding; purine ribonucleoside binding; lipid binding; cation binding; anion binding; aden…	K16308			IPR002290; IPR001180; IPR011009; IPR000961; IPR001849; IPR017892; IPR002219; IPR000719; IPR011993;	Protein kinase domain; Pleckstrin homology-like domain; Protein kinase C-like, phorbol ester/diacylglycerol binding; Pleckstrin homology domain; Protein kinase, C-terminal; Protein kinase-like domain; AGC-kinase, C-terminal; Serine/threonine- /dual specificity protein kinase, catalytic domain; Citron-like;
O14578	1432	S	Citron Rho-interacting kinase	CIT				1.145	1.033	1.137						......SP....K	CRDKMNSPGLQTK	nucl	single organism signaling; negative regulation of developmental process; reproductive process; negative regulation of cellular component organization; mitosis; neuron development; cellular developmental process; neurogenesis; single-organism process; sister chromatid segregation; signal transduction; negative regulation of dendrite morphogenesis; cell communication; single organism reproductive p…	cell leading edge; intracellular organelle; cell projection; intracellular non-membrane-bounded organelle; cytoplasm; intracellular part; cell; actin cytoskeleton; non-membrane-bounded organelle; cytoskeleton; organelle; intracellular membrane-bounded organelle; intracellular; cell part; vacuole; ruffle; membrane-bounded organelle; cytoplasmic part;	nucleoside phosphate binding; phosphotransferase activity, alcohol group as acceptor; nucleoside-triphosphatase regulator activity; GTPase regulator activity; protein kinase activity; organic cyclic compound binding; heterocyclic compound binding; kinase activity; catalytic activity; ribonucleotide binding; binding; purine ribonucleoside binding; lipid binding; cation binding; anion binding; aden…	K16308			IPR002290; IPR001180; IPR011009; IPR000961; IPR001849; IPR017892; IPR002219; IPR000719; IPR011993;	Protein kinase domain; Pleckstrin homology-like domain; Protein kinase C-like, phorbol ester/diacylglycerol binding; Pleckstrin homology domain; Protein kinase, C-terminal; Protein kinase-like domain; AGC-kinase, C-terminal; Serine/threonine- /dual specificity protein kinase, catalytic domain; Citron-like;
O14578	1971	S	Citron Rho-interacting kinase	CIT	1.266	1.302	1.342	1.145	1.033	1.137	1.10568	1.26041	1.1803	1.18213	0.0698579	......SP.R...	ELRRDKSPGRPLE	nucl	single organism signaling; negative regulation of developmental process; reproductive process; negative regulation of cellular component organization; mitosis; neuron development; cellular developmental process; neurogenesis; single-organism process; sister chromatid segregation; signal transduction; negative regulation of dendrite morphogenesis; cell communication; single organism reproductive p…	cell leading edge; intracellular organelle; cell projection; intracellular non-membrane-bounded organelle; cytoplasm; intracellular part; cell; actin cytoskeleton; non-membrane-bounded organelle; cytoskeleton; organelle; intracellular membrane-bounded organelle; intracellular; cell part; vacuole; ruffle; membrane-bounded organelle; cytoplasmic part;	nucleoside phosphate binding; phosphotransferase activity, alcohol group as acceptor; nucleoside-triphosphatase regulator activity; GTPase regulator activity; protein kinase activity; organic cyclic compound binding; heterocyclic compound binding; kinase activity; catalytic activity; ribonucleotide binding; binding; purine ribonucleoside binding; lipid binding; cation binding; anion binding; aden…	K16308			IPR002290; IPR001180; IPR011009; IPR000961; IPR001849; IPR017892; IPR002219; IPR000719; IPR011993;	Protein kinase domain; Pleckstrin homology-like domain; Protein kinase C-like, phorbol ester/diacylglycerol binding; Pleckstrin homology domain; Protein kinase, C-terminal; Protein kinase-like domain; AGC-kinase, C-terminal; Serine/threonine- /dual specificity protein kinase, catalytic domain; Citron-like;
O14579	99	S	Coatomer subunit epsilon	COPE				0.995	1.01	1.013						...RR.S......	HESRRDSIVAELD	cyto	organelle localization; cellular component organization; vesicle coating; intracellular transport; single-organism process; Golgi vesicle transport; vesicle targeting; COPI coating of Golgi vesicle; protein transport; establishment of localization; Golgi transport vesicle coating; establishment of localization in cell; vesicle targeting, to, from or within Golgi; vesicle localization; Golgi vesic…	membrane; cytoplasmic vesicle; organelle membrane; membrane-bounded vesicle; cytoplasmic membrane-bounded vesicle; COPI-coated vesicle; cytoplasm; vesicle; Golgi-associated vesicle membrane; cytoplasmic vesicle part; macromolecular complex; intracellular part; vesicle coat; cell; COPI-coated vesicle membrane; organelle part; coated vesicle membrane; COPI vesicle coat; intracellular; cell part; me…	structural molecule activity;	K17268			IPR011990;	Tetratricopeptide-like helical;
O14579	307	S	Coatomer subunit epsilon	COPE				0.995	1.01	1.013							VLQYAPSA-----	cyto	organelle localization; cellular component organization; vesicle coating; intracellular transport; single-organism process; Golgi vesicle transport; vesicle targeting; COPI coating of Golgi vesicle; protein transport; establishment of localization; Golgi transport vesicle coating; establishment of localization in cell; vesicle targeting, to, from or within Golgi; vesicle localization; Golgi vesic…	membrane; cytoplasmic vesicle; organelle membrane; membrane-bounded vesicle; cytoplasmic membrane-bounded vesicle; COPI-coated vesicle; cytoplasm; vesicle; Golgi-associated vesicle membrane; cytoplasmic vesicle part; macromolecular complex; intracellular part; vesicle coat; cell; COPI-coated vesicle membrane; organelle part; coated vesicle membrane; COPI vesicle coat; intracellular; cell part; me…	structural molecule activity;	K17268			IPR011990;	Tetratricopeptide-like helical;
O14595	5	S	Carboxy-terminal domain RNA polymerase II polypeptide A small phosphatase 2	CTDSP2	0.744	0.64	0.774										--MEHGSIITQAR	cyto	single organism signaling; positive regulation of cellular protein metabolic process; single-organism process; cellular metabolic process; phosphate-containing compound metabolic process; endoplasmic reticulum unfolded protein response; metabolic process; signal transduction; response to topologically incorrect protein; cell communication; positive regulation of metabolic process; positive regula…	intracellular organelle; intracellular organelle part; nuclear lumen; intracellular part; cell; organelle part; organelle; intracellular membrane-bounded organelle; membrane-enclosed lumen; nucleoplasm; nucleus; intracellular organelle lumen; cell part; intracellular; membrane-bounded organelle; organelle lumen; nuclear part;	CTD phosphatase activity; catalytic activity; phosphoric ester hydrolase activity; binding; phosphatase activity; protein serine/threonine phosphatase activity; ion binding; hydrolase activity, acting on ester bonds; cation binding; metal ion binding; hydrolase activity; phosphoprotein phosphatase activity;	K15731			IPR011948; IPR004274; IPR023214;	NLI interacting factor; HAD-like domain; Dullard phosphatase domain, eukaryotic;
O14613	141	S	Cdc42 effector protein 2	CDC42EP2												......SP.....	LETPQPSPQEGGS	mito	regulation of actin filament polymerization; regulation of cellular process; cellular component organization; regulation of biological quality; positive regulation of protein polymerization; regulation of cell projection assembly; regulation of actin cytoskeleton organization; actin filament organization; single-organism process; regulation of cell projection organization; regulation of cellular …	membrane; organelle; cytoskeleton; intracellular organelle; microtubule cytoskeleton; intracellular non-membrane-bounded organelle; cell periphery; cell part; intracellular; cytoplasm; endomembrane system; intracellular part; cell; plasma membrane; non-membrane-bounded organelle;	Rho GTPase activator activity; enzyme regulator activity; Ras GTPase activator activity; nucleoside-triphosphatase regulator activity; GTPase regulator activity; small GTPase regulator activity; enzyme activator activity; GTPase activator activity;				IPR000095;	CRIB domain;
O14617	9	S	AP-3 complex subunit delta-1	AP3D1				0.972	0.943	0.969						.....GS......	LKMVKGSIDRMFD	cyto	regulation of T cell activation; single organism signaling; regulation of leukocyte activation; pigment biosynthetic process; endomembrane system organization; single-organism process; biosynthetic process; regulation of lymphocyte activation; positive regulation of alpha-beta T cell activation; protein transport; neurological system process; establishment of localization; positive regulation of …	membrane; organelle membrane; cytoplasm; macromolecular complex; intracellular part; cell; axon terminus; organelle part; membrane part; cell part; intracellular; neuron projection; Golgi apparatus part; endosome; neuron projection terminus; membrane-bounded organelle; neuron part; synapse part; intracellular organelle; endosome membrane; cell projection; coated membrane; intracellular organelle …	substrate-specific transporter activity; protein transporter activity; transporter activity;	K12396	AP3D1; AP-3 complex subunit delta-1	hsa04142 Lysosome - Homo sapiens (human);	IPR011989; IPR016024; IPR002553;	Clathrin/coatomer adaptor, adaptin-like, N-terminal; Armadillo-type fold; Armadillo-like helical;	AP3D1-AP3S1 complex; AP3 adapter complex; AP3D1-AP3S2 complex; AP3-BLOC1 complex;
O14617	658	S	AP-3 complex subunit delta-1	AP3D1	2.897	2.127	1.682	0.972	0.943	0.969	2.98045	2.25557	1.73581	2.32394	0.0503986	....R.S......	RPKHRPSEADEEE	cyto	regulation of T cell activation; single organism signaling; regulation of leukocyte activation; pigment biosynthetic process; endomembrane system organization; single-organism process; biosynthetic process; regulation of lymphocyte activation; positive regulation of alpha-beta T cell activation; protein transport; neurological system process; establishment of localization; positive regulation of …	membrane; organelle membrane; cytoplasm; macromolecular complex; intracellular part; cell; axon terminus; organelle part; membrane part; cell part; intracellular; neuron projection; Golgi apparatus part; endosome; neuron projection terminus; membrane-bounded organelle; neuron part; synapse part; intracellular organelle; endosome membrane; cell projection; coated membrane; intracellular organelle …	substrate-specific transporter activity; protein transporter activity; transporter activity;	K12396	AP3D1; AP-3 complex subunit delta-1	hsa04142 Lysosome - Homo sapiens (human);	IPR011989; IPR016024; IPR002553;	Clathrin/coatomer adaptor, adaptin-like, N-terminal; Armadillo-type fold; Armadillo-like helical;	AP3D1-AP3S1 complex; AP3 adapter complex; AP3D1-AP3S2 complex; AP3-BLOC1 complex;
O14617	827	S	AP-3 complex subunit delta-1	AP3D1				0.972	0.943	0.969						.R....S......	HRNTETSKSPEKD	cyto	regulation of T cell activation; single organism signaling; regulation of leukocyte activation; pigment biosynthetic process; endomembrane system organization; single-organism process; biosynthetic process; regulation of lymphocyte activation; positive regulation of alpha-beta T cell activation; protein transport; neurological system process; establishment of localization; positive regulation of …	membrane; organelle membrane; cytoplasm; macromolecular complex; intracellular part; cell; axon terminus; organelle part; membrane part; cell part; intracellular; neuron projection; Golgi apparatus part; endosome; neuron projection terminus; membrane-bounded organelle; neuron part; synapse part; intracellular organelle; endosome membrane; cell projection; coated membrane; intracellular organelle …	substrate-specific transporter activity; protein transporter activity; transporter activity;	K12396	AP3D1; AP-3 complex subunit delta-1	hsa04142 Lysosome - Homo sapiens (human);	IPR011989; IPR016024; IPR002553;	Clathrin/coatomer adaptor, adaptin-like, N-terminal; Armadillo-type fold; Armadillo-like helical;	AP3D1-AP3S1 complex; AP3 adapter complex; AP3D1-AP3S2 complex; AP3-BLOC1 complex;
O14617	829	S	AP-3 complex subunit delta-1	AP3D1	0.993	0.951	0.918	0.972	0.943	0.969	1.0216	1.00848	0.947368	0.992486	0.803595	......SP.K...	NTETSKSPEKDVP	cyto	regulation of T cell activation; single organism signaling; regulation of leukocyte activation; pigment biosynthetic process; endomembrane system organization; single-organism process; biosynthetic process; regulation of lymphocyte activation; positive regulation of alpha-beta T cell activation; protein transport; neurological system process; establishment of localization; positive regulation of …	membrane; organelle membrane; cytoplasm; macromolecular complex; intracellular part; cell; axon terminus; organelle part; membrane part; cell part; intracellular; neuron projection; Golgi apparatus part; endosome; neuron projection terminus; membrane-bounded organelle; neuron part; synapse part; intracellular organelle; endosome membrane; cell projection; coated membrane; intracellular organelle …	substrate-specific transporter activity; protein transporter activity; transporter activity;	K12396	AP3D1; AP-3 complex subunit delta-1	hsa04142 Lysosome - Homo sapiens (human);	IPR011989; IPR016024; IPR002553;	Clathrin/coatomer adaptor, adaptin-like, N-terminal; Armadillo-type fold; Armadillo-like helical;	AP3D1-AP3S1 complex; AP3 adapter complex; AP3D1-AP3S2 complex; AP3-BLOC1 complex;
O14639	353	S	Actin-binding LIM protein 1	ABLIM1		0.718		0.639	0.575	0.639		1.2487		1.2487		...RT.S......	RPTRTSSESIYSR	nucl	visual perception; cellular developmental process; neuron development; positive regulation of biosynthetic process; neurogenesis; cellular component morphogenesis; single-organism process; neurological system process; regulation of RNA biosynthetic process; response to external stimulus; positive regulation of metabolic process; cell part morphogenesis; positive regulation of nitrogen compound me…	organelle; cytoskeleton; intracellular organelle; intracellular non-membrane-bounded organelle; cell part; intracellular; cytoplasm; intracellular part; cell; actin cytoskeleton; non-membrane-bounded organelle;	cytoskeletal protein binding; transition metal ion binding; binding; ion binding; actin binding; metal ion binding; cation binding; protein binding; zinc ion binding;	K07520	ABLIM; actin-binding LIM protein	hsa04360 Axon guidance - Homo sapiens (human);	IPR001781; IPR003128;	Villin headpiece; Zinc finger, LIM-type;
O14639	367	S	Actin-binding LIM protein 1	ABLIM1			0.707	0.639	0.575	0.639			1.10642	1.10642		....P.SP.....	GSSIPGSPGHTIY	nucl	visual perception; cellular developmental process; neuron development; positive regulation of biosynthetic process; neurogenesis; cellular component morphogenesis; single-organism process; neurological system process; regulation of RNA biosynthetic process; response to external stimulus; positive regulation of metabolic process; cell part morphogenesis; positive regulation of nitrogen compound me…	organelle; cytoskeleton; intracellular organelle; intracellular non-membrane-bounded organelle; cell part; intracellular; cytoplasm; intracellular part; cell; actin cytoskeleton; non-membrane-bounded organelle;	cytoskeletal protein binding; transition metal ion binding; binding; ion binding; actin binding; metal ion binding; cation binding; protein binding; zinc ion binding;	K07520	ABLIM; actin-binding LIM protein	hsa04360 Axon guidance - Homo sapiens (human);	IPR001781; IPR003128;	Villin headpiece; Zinc finger, LIM-type;
O14639	431	S	Actin-binding LIM protein 1	ABLIM1	0.703	0.72	0.718	0.639	0.575	0.639	1.10016	1.25217	1.12363	1.15865	0.097354	...R..SP.....	ESPRTLSPTPSAE	nucl	visual perception; cellular developmental process; neuron development; positive regulation of biosynthetic process; neurogenesis; cellular component morphogenesis; single-organism process; neurological system process; regulation of RNA biosynthetic process; response to external stimulus; positive regulation of metabolic process; cell part morphogenesis; positive regulation of nitrogen compound me…	organelle; cytoskeleton; intracellular organelle; intracellular non-membrane-bounded organelle; cell part; intracellular; cytoplasm; intracellular part; cell; actin cytoskeleton; non-membrane-bounded organelle;	cytoskeletal protein binding; transition metal ion binding; binding; ion binding; actin binding; metal ion binding; cation binding; protein binding; zinc ion binding;	K07520	ABLIM; actin-binding LIM protein	hsa04360 Axon guidance - Homo sapiens (human);	IPR001781; IPR003128;	Villin headpiece; Zinc finger, LIM-type;
O14639	452	S	Actin-binding LIM protein 1	ABLIM1	0.991	0.902	0.897	0.639	0.575	0.639	1.55086	1.5687	1.40376	1.50777	0.0109564	...RS.S......	MIHRSTSQGSINS	nucl	visual perception; cellular developmental process; neuron development; positive regulation of biosynthetic process; neurogenesis; cellular component morphogenesis; single-organism process; neurological system process; regulation of RNA biosynthetic process; response to external stimulus; positive regulation of metabolic process; cell part morphogenesis; positive regulation of nitrogen compound me…	organelle; cytoskeleton; intracellular organelle; intracellular non-membrane-bounded organelle; cell part; intracellular; cytoplasm; intracellular part; cell; actin cytoskeleton; non-membrane-bounded organelle;	cytoskeletal protein binding; transition metal ion binding; binding; ion binding; actin binding; metal ion binding; cation binding; protein binding; zinc ion binding;	K07520	ABLIM; actin-binding LIM protein	hsa04360 Axon guidance - Homo sapiens (human);	IPR001781; IPR003128;	Villin headpiece; Zinc finger, LIM-type;
O14639	455	S	Actin-binding LIM protein 1	ABLIM1				0.639	0.575	0.639						.....GS......	RSTSQGSINSPVY	nucl	visual perception; cellular developmental process; neuron development; positive regulation of biosynthetic process; neurogenesis; cellular component morphogenesis; single-organism process; neurological system process; regulation of RNA biosynthetic process; response to external stimulus; positive regulation of metabolic process; cell part morphogenesis; positive regulation of nitrogen compound me…	organelle; cytoskeleton; intracellular organelle; intracellular non-membrane-bounded organelle; cell part; intracellular; cytoplasm; intracellular part; cell; actin cytoskeleton; non-membrane-bounded organelle;	cytoskeletal protein binding; transition metal ion binding; binding; ion binding; actin binding; metal ion binding; cation binding; protein binding; zinc ion binding;	K07520	ABLIM; actin-binding LIM protein	hsa04360 Axon guidance - Homo sapiens (human);	IPR001781; IPR003128;	Villin headpiece; Zinc finger, LIM-type;
O14639	655	S	Actin-binding LIM protein 1	ABLIM1	0.371	0.382	0.383	0.639	0.575	0.639	0.580595	0.664348	0.599374	0.614772	0.0102482	......SL.....	PSSKTASLPGYGR	nucl	visual perception; cellular developmental process; neuron development; positive regulation of biosynthetic process; neurogenesis; cellular component morphogenesis; single-organism process; neurological system process; regulation of RNA biosynthetic process; response to external stimulus; positive regulation of metabolic process; cell part morphogenesis; positive regulation of nitrogen compound me…	organelle; cytoskeleton; intracellular organelle; intracellular non-membrane-bounded organelle; cell part; intracellular; cytoplasm; intracellular part; cell; actin cytoskeleton; non-membrane-bounded organelle;	cytoskeletal protein binding; transition metal ion binding; binding; ion binding; actin binding; metal ion binding; cation binding; protein binding; zinc ion binding;	K07520	ABLIM; actin-binding LIM protein	hsa04360 Axon guidance - Homo sapiens (human);	IPR001781; IPR003128;	Villin headpiece; Zinc finger, LIM-type;
O14639	706	S	Actin-binding LIM protein 1	ABLIM1	0.726		0.757	0.639	0.575	0.639	1.13615		1.18466	1.16041		...R..S......	RMDRGVSMPNMLE	nucl	visual perception; cellular developmental process; neuron development; positive regulation of biosynthetic process; neurogenesis; cellular component morphogenesis; single-organism process; neurological system process; regulation of RNA biosynthetic process; response to external stimulus; positive regulation of metabolic process; cell part morphogenesis; positive regulation of nitrogen compound me…	organelle; cytoskeleton; intracellular organelle; intracellular non-membrane-bounded organelle; cell part; intracellular; cytoplasm; intracellular part; cell; actin cytoskeleton; non-membrane-bounded organelle;	cytoskeletal protein binding; transition metal ion binding; binding; ion binding; actin binding; metal ion binding; cation binding; protein binding; zinc ion binding;	K07520	ABLIM; actin-binding LIM protein	hsa04360 Axon guidance - Homo sapiens (human);	IPR001781; IPR003128;	Villin headpiece; Zinc finger, LIM-type;
O14646	1677	S	Chromodomain-helicase-DNA-binding protein 1	CHD1	1.14	1.136	1.237		0.9	0.913		1.26222	1.35487	1.30855		....P.SP.....	SSSGPRSPLDQRS	nucl	regulation of cellular process; cellular component organization; chromatin remodeling; cellular aromatic compound metabolic process; regulation of macromolecule metabolic process; regulation of nucleobase-containing compound metabolic process; single-organism process; biosynthetic process; cellular metabolic process; organic substance metabolic process; regulation of RNA biosynthetic process; met…	organelle; intracellular membrane-bounded organelle; intracellular organelle; nucleus; cell part; intracellular; cytoplasm; intracellular part; membrane-bounded organelle; cell;	nucleoside phosphate binding; methylated histone residue binding; ATP-dependent helicase activity; hydrolase activity, acting on acid anhydrides; protein binding; hydrolase activity; ATPase activity; organic cyclic compound binding; heterocyclic compound binding; pyrophosphatase activity; catalytic activity; ribonucleotide binding; binding; ATP-dependent DNA helicase activity; purine ribonucleosi…	K11367			IPR023780; IPR014001; IPR016197; IPR027417; IPR001650; IPR025260; IPR000953; IPR000330;	Chromo domain; SNF2-related; Chromo domain/shadow; Helicase, C-terminal; Helicase, superfamily 1/2, ATP-binding domain; Domain of unknown function DUF4208; Chromo domain-like; P-loop containing nucleoside triphosphate hydrolase;
O14646	1687	S	Chromodomain-helicase-DNA-binding protein 1	CHD1	0.699	0.693	0.663		0.9	0.913		0.77	0.726177	0.748089		.....GS......	QRSPYGSRSPFEH	nucl	regulation of cellular process; cellular component organization; chromatin remodeling; cellular aromatic compound metabolic process; regulation of macromolecule metabolic process; regulation of nucleobase-containing compound metabolic process; single-organism process; biosynthetic process; cellular metabolic process; organic substance metabolic process; regulation of RNA biosynthetic process; met…	organelle; intracellular membrane-bounded organelle; intracellular organelle; nucleus; cell part; intracellular; cytoplasm; intracellular part; membrane-bounded organelle; cell;	nucleoside phosphate binding; methylated histone residue binding; ATP-dependent helicase activity; hydrolase activity, acting on acid anhydrides; protein binding; hydrolase activity; ATPase activity; organic cyclic compound binding; heterocyclic compound binding; pyrophosphatase activity; catalytic activity; ribonucleotide binding; binding; ATP-dependent DNA helicase activity; purine ribonucleosi…	K11367			IPR023780; IPR014001; IPR016197; IPR027417; IPR001650; IPR025260; IPR000953; IPR000330;	Chromo domain; SNF2-related; Chromo domain/shadow; Helicase, C-terminal; Helicase, superfamily 1/2, ATP-binding domain; Domain of unknown function DUF4208; Chromo domain-like; P-loop containing nucleoside triphosphate hydrolase;
O14646	1689	S	Chromodomain-helicase-DNA-binding protein 1	CHD1	0.863	0.848	0.841		0.9	0.913		0.942222	0.921139	0.931681		...G..SP.....	SPYGSRSPFEHSV	nucl	regulation of cellular process; cellular component organization; chromatin remodeling; cellular aromatic compound metabolic process; regulation of macromolecule metabolic process; regulation of nucleobase-containing compound metabolic process; single-organism process; biosynthetic process; cellular metabolic process; organic substance metabolic process; regulation of RNA biosynthetic process; met…	organelle; intracellular membrane-bounded organelle; intracellular organelle; nucleus; cell part; intracellular; cytoplasm; intracellular part; membrane-bounded organelle; cell;	nucleoside phosphate binding; methylated histone residue binding; ATP-dependent helicase activity; hydrolase activity, acting on acid anhydrides; protein binding; hydrolase activity; ATPase activity; organic cyclic compound binding; heterocyclic compound binding; pyrophosphatase activity; catalytic activity; ribonucleotide binding; binding; ATP-dependent DNA helicase activity; purine ribonucleosi…	K11367			IPR023780; IPR014001; IPR016197; IPR027417; IPR001650; IPR025260; IPR000953; IPR000330;	Chromo domain; SNF2-related; Chromo domain/shadow; Helicase, C-terminal; Helicase, superfamily 1/2, ATP-binding domain; Domain of unknown function DUF4208; Chromo domain-like; P-loop containing nucleoside triphosphate hydrolase;
O14646	1700	T	Chromodomain-helicase-DNA-binding protein 1	CHD1	1.014	1.098			0.9	0.913		1.22		1.22		......TP.....	SVEHKSTPEHTWS	nucl	regulation of cellular process; cellular component organization; chromatin remodeling; cellular aromatic compound metabolic process; regulation of macromolecule metabolic process; regulation of nucleobase-containing compound metabolic process; single-organism process; biosynthetic process; cellular metabolic process; organic substance metabolic process; regulation of RNA biosynthetic process; met…	organelle; intracellular membrane-bounded organelle; intracellular organelle; nucleus; cell part; intracellular; cytoplasm; intracellular part; membrane-bounded organelle; cell;	nucleoside phosphate binding; methylated histone residue binding; ATP-dependent helicase activity; hydrolase activity, acting on acid anhydrides; protein binding; hydrolase activity; ATPase activity; organic cyclic compound binding; heterocyclic compound binding; pyrophosphatase activity; catalytic activity; ribonucleotide binding; binding; ATP-dependent DNA helicase activity; purine ribonucleosi…	K11367			IPR023780; IPR014001; IPR016197; IPR027417; IPR001650; IPR025260; IPR000953; IPR000330;	Chromo domain; SNF2-related; Chromo domain/shadow; Helicase, C-terminal; Helicase, superfamily 1/2, ATP-binding domain; Domain of unknown function DUF4208; Chromo domain-like; P-loop containing nucleoside triphosphate hydrolase;
O14647	1728	S	Chromodomain-helicase-DNA-binding protein 2	CHD2	1.487		1.14	0.938		0.964	1.58529		1.18257	1.38393		...RR.S......	DSKRRRSDEFRPQ	nucl	regulation of cellular process; regulation of gene expression; regulation of transcription, DNA-dependent; regulation of cellular biosynthetic process; regulation of primary metabolic process; regulation of macromolecule metabolic process; regulation of nucleobase-containing compound metabolic process; regulation of transcription from RNA polymerase II promoter; regulation of macromolecule biosyn…	organelle; intracellular membrane-bounded organelle; intracellular organelle; nucleus; cell part; intracellular; intracellular part; membrane-bounded organelle; cell;	nucleoside phosphate binding; ATP-dependent helicase activity; hydrolase activity, acting on acid anhydrides; hydrolase activity; ATPase activity; organic cyclic compound binding; heterocyclic compound binding; pyrophosphatase activity; catalytic activity; ribonucleotide binding; binding; ATP-dependent DNA helicase activity; purine ribonucleoside binding; anion binding; adenyl ribonucleotide bind…				IPR023780; IPR014001; IPR016197; IPR027417; IPR001650; IPR025260; IPR000953; IPR000330;	Chromo domain; SNF2-related; Chromo domain/shadow; Helicase, C-terminal; Helicase, superfamily 1/2, ATP-binding domain; Domain of unknown function DUF4208; Chromo domain-like; P-loop containing nucleoside triphosphate hydrolase;
O14662	41	S	Syntaxin-16	STX16		3.509		1.041	1.155	1.105		3.0381		3.0381			SPLHSRSIAAELD	mito	intracellular transport; intra-Golgi vesicle-mediated transport; vesicle-mediated transport; single-organism cellular process; single-organism process; Golgi vesicle transport; organic substance transport; protein transport; establishment of localization; cellular localization; endosomal transport; establishment of protein localization; transport; cellular macromolecule localization; establishmen…	membrane; organelle membrane; cytoplasm; macromolecular complex; intrinsic to membrane; intracellular part; cell; organelle part; non-membrane-bounded organelle; membrane-enclosed lumen; intracellular organelle lumen; membrane part; intracellular; cell part; Golgi apparatus part; membrane-bounded organelle; SNARE complex; organelle lumen; intracellular organelle; intracellular non-membrane-bounde…	SNAP receptor activity; protein binding; binding;	K08489	STX16; syntaxin 16	hsa04130 SNARE interactions in vesicular transport - Homo sapiens (human);	IPR000727; IPR010989; IPR006011;	t-SNARE; Syntaxin, N-terminal domain; Target SNARE coiled-coil domain;	SNARE complex;
O14672	436	S	Disintegrin and metalloproteinase domain-containing protein 10	ADAM10				1.341	1.343	1.163							NKFSLCSIRNISQ	plas	positive regulation of T cell chemotaxis; single organism signaling; positive regulation of cell migration; leukocyte activation; cell surface receptor signaling pathway; positive regulation of locomotion; chordate embryonic development; single-organism process; membrane protein proteolysis; cellular metabolic process; phosphate-containing compound metabolic process; positive regulation of growth…	membrane; cytoplasmic vesicle; cell periphery; membrane-bounded vesicle; cytoplasmic membrane-bounded vesicle; vesicle; cytoplasm; intrinsic to membrane; intracellular part; cell; organelle part; non-membrane-bounded organelle; cytoskeleton; membrane part; intracellular; cell part; postsynaptic density; Golgi apparatus part; membrane-bounded organelle; synapse part; intracellular organelle; intra…	metalloendopeptidase activity; peptidase activity; receptor binding; ion binding; protein kinase binding; protein dimerization activity; metallopeptidase activity; hydrolase activity; protein binding; integrin binding; zinc ion binding; kinase binding; endopeptidase activity; identical protein binding; transition metal ion binding; catalytic activity; binding; protein homodimerization activity; c…	K06704	ADAM10; disintegrin and metalloproteinase domain-containing protein 10 [EC:3.4.24.81]	hsa05120 Epithelial cell signaling in Helicobacter pylori infection - Homo sapiens (human); hsa05010 Alzheimer's disease - Homo sapiens (human);	IPR024079; IPR002870; IPR001762; IPR001590;	Peptidase M12B, ADAM/reprolysin; Metallopeptidase, catalytic domain; Blood coagulation inhibitor, Disintegrin; Peptidase M12B, propeptide;
O14672	719	T	Disintegrin and metalloproteinase domain-containing protein 10	ADAM10	1.759	1.655		1.341	1.343	1.163	1.31171	1.23232		1.27201			PKPLPGTLKRRRP	plas	positive regulation of T cell chemotaxis; single organism signaling; positive regulation of cell migration; leukocyte activation; cell surface receptor signaling pathway; positive regulation of locomotion; chordate embryonic development; single-organism process; membrane protein proteolysis; cellular metabolic process; phosphate-containing compound metabolic process; positive regulation of growth…	membrane; cytoplasmic vesicle; cell periphery; membrane-bounded vesicle; cytoplasmic membrane-bounded vesicle; vesicle; cytoplasm; intrinsic to membrane; intracellular part; cell; organelle part; non-membrane-bounded organelle; cytoskeleton; membrane part; intracellular; cell part; postsynaptic density; Golgi apparatus part; membrane-bounded organelle; synapse part; intracellular organelle; intra…	metalloendopeptidase activity; peptidase activity; receptor binding; ion binding; protein kinase binding; protein dimerization activity; metallopeptidase activity; hydrolase activity; protein binding; integrin binding; zinc ion binding; kinase binding; endopeptidase activity; identical protein binding; transition metal ion binding; catalytic activity; binding; protein homodimerization activity; c…	K06704	ADAM10; disintegrin and metalloproteinase domain-containing protein 10 [EC:3.4.24.81]	hsa05120 Epithelial cell signaling in Helicobacter pylori infection - Homo sapiens (human); hsa05010 Alzheimer's disease - Homo sapiens (human);	IPR024079; IPR002870; IPR001762; IPR001590;	Peptidase M12B, ADAM/reprolysin; Metallopeptidase, catalytic domain; Blood coagulation inhibitor, Disintegrin; Peptidase M12B, propeptide;
O14681	46	S	Etoposide-induced protein 2.4 homolog	EI24			0.723	1.273								...RR.S......	QRRRRASSVLAQR	plas	regulation of cellular process; negative regulation of growth; regulation of growth; death; single-organism cellular process; single-organism process; negative regulation of biological process; negative regulation of cellular process; response to stimulus; autophagy; cellular metabolic process; regulation of cell growth; negative regulation of cell growth; response to drug; metabolic process; res…	membrane; intracellular organelle; endoplasmic reticulum; nuclear outer membrane-endoplasmic reticulum membrane network; nuclear envelope; organelle membrane; organelle envelope; cytoplasm; intracellular organelle part; intrinsic to membrane; endomembrane system; intracellular part; cell; integral to membrane; organelle part; intracellular membrane-bounded organelle; organelle; nucleus; nuclear m…		K10134	EI24; etoposide-induced 2.4 mRNA	hsa04115 p53 signaling pathway - Homo sapiens (human);
O14681	47	S	Etoposide-induced protein 2.4 homolog	EI24	1.079	1.06		1.273			0.847604			0.847604		.R.R..S......	RRRRASSVLAQRR	plas	regulation of cellular process; negative regulation of growth; regulation of growth; death; single-organism cellular process; single-organism process; negative regulation of biological process; negative regulation of cellular process; response to stimulus; autophagy; cellular metabolic process; regulation of cell growth; negative regulation of cell growth; response to drug; metabolic process; res…	membrane; intracellular organelle; endoplasmic reticulum; nuclear outer membrane-endoplasmic reticulum membrane network; nuclear envelope; organelle membrane; organelle envelope; cytoplasm; intracellular organelle part; intrinsic to membrane; endomembrane system; intracellular part; cell; integral to membrane; organelle part; intracellular membrane-bounded organelle; organelle; nucleus; nuclear m…		K10134	EI24; etoposide-induced 2.4 mRNA	hsa04115 p53 signaling pathway - Homo sapiens (human);
O14681	326	S	Etoposide-induced protein 2.4 homolog	EI24			1.379	1.273								......SP.....	SAEKFPSPHPSPA	plas	regulation of cellular process; negative regulation of growth; regulation of growth; death; single-organism cellular process; single-organism process; negative regulation of biological process; negative regulation of cellular process; response to stimulus; autophagy; cellular metabolic process; regulation of cell growth; negative regulation of cell growth; response to drug; metabolic process; res…	membrane; intracellular organelle; endoplasmic reticulum; nuclear outer membrane-endoplasmic reticulum membrane network; nuclear envelope; organelle membrane; organelle envelope; cytoplasm; intracellular organelle part; intrinsic to membrane; endomembrane system; intracellular part; cell; integral to membrane; organelle part; intracellular membrane-bounded organelle; organelle; nucleus; nuclear m…		K10134	EI24; etoposide-induced 2.4 mRNA	hsa04115 p53 signaling pathway - Homo sapiens (human);
O14681	330	S	Etoposide-induced protein 2.4 homolog	EI24	2.373		1.379	1.273			1.8641			1.8641		......SP.K...	FPSPHPSPAKLKA	plas	regulation of cellular process; negative regulation of growth; regulation of growth; death; single-organism cellular process; single-organism process; negative regulation of biological process; negative regulation of cellular process; response to stimulus; autophagy; cellular metabolic process; regulation of cell growth; negative regulation of cell growth; response to drug; metabolic process; res…	membrane; intracellular organelle; endoplasmic reticulum; nuclear outer membrane-endoplasmic reticulum membrane network; nuclear envelope; organelle membrane; organelle envelope; cytoplasm; intracellular organelle part; intrinsic to membrane; endomembrane system; intracellular part; cell; integral to membrane; organelle part; intracellular membrane-bounded organelle; organelle; nucleus; nuclear m…		K10134	EI24; etoposide-induced 2.4 mRNA	hsa04115 p53 signaling pathway - Homo sapiens (human);
O14683	14	S	Tumor protein p53-inducible protein 11	TP53I11												...K..S......	PLMKKHSQTDLVS	plas	regulation of cellular process; regulation of biological process; response to stress; regulation of cell proliferation; negative regulation of biological process; negative regulation of cellular process; response to stimulus; negative regulation of cell proliferation; biological regulation;	intrinsic to membrane; membrane; integral to membrane; membrane part;
O14686	654	S	Histone-lysine N-methyltransferase 2D	KMT2D		1.296				1.308						......SP.....	PEVSRLSPLPVVS	nucl	reproductive process; chordate embryonic development; positive regulation of biosynthetic process; cellular metabolic process; protein alkylation; metabolic process; single organism reproductive process; response to steroid hormone stimulus; response to endogenous stimulus; macromolecule metabolic process; protein metabolic process; negative regulation of macromolecule biosynthetic process; embry…	intracellular organelle; intracellular organelle part; nuclear lumen; macromolecular complex; histone methyltransferase complex; intracellular part; cell; organelle part; methyltransferase complex; membrane-enclosed lumen; intracellular membrane-bounded organelle; organelle; nucleoplasm; nucleus; intracellular organelle lumen; cell part; intracellular; membrane-bounded organelle; protein complex;…	DNA binding; S-adenosylmethionine-dependent methyltransferase activity; methyltransferase activity; ion binding; lysine N-methyltransferase activity; protein-lysine N-methyltransferase activity; transferase activity, transferring one-carbon groups; zinc ion binding; histone-lysine N-methyltransferase activity; heterocyclic compound binding; regulatory region DNA binding; organic cyclic compound b…	K09187	MLL2; histone-lysine N-methyltransferase MLL2 [EC:2.1.1.43]	hsa00310 Lysine degradation - Homo sapiens (human);	IPR001214; IPR001841; IPR001965; IPR003889; IPR003888; IPR003616; IPR009071; IPR013083; IPR011011; IPR019787;	Zinc finger, PHD-type; Zinc finger, PHD-finger; Post-SET domain; Zinc finger, FYVE/PHD-type; Zinc finger, RING-type; High mobility group box domain; FY-rich, C-terminal; FY-rich, N-terminal; Zinc finger, RING/FYVE/PHD-type; SET domain;	UTX-MLL2/3 complex; WDR5-ASH2L-RBBP5-MLL2 complex; ASCOM complex; MOF complex;
O14686	1195	T	Histone-lysine N-methyltransferase 2D	KMT2D	1.433		1.307			1.308			0.999235	0.999235		......TPP....	RAPVAPTPPTLIK	nucl	reproductive process; chordate embryonic development; positive regulation of biosynthetic process; cellular metabolic process; protein alkylation; metabolic process; single organism reproductive process; response to steroid hormone stimulus; response to endogenous stimulus; macromolecule metabolic process; protein metabolic process; negative regulation of macromolecule biosynthetic process; embry…	intracellular organelle; intracellular organelle part; nuclear lumen; macromolecular complex; histone methyltransferase complex; intracellular part; cell; organelle part; methyltransferase complex; membrane-enclosed lumen; intracellular membrane-bounded organelle; organelle; nucleoplasm; nucleus; intracellular organelle lumen; cell part; intracellular; membrane-bounded organelle; protein complex;…	DNA binding; S-adenosylmethionine-dependent methyltransferase activity; methyltransferase activity; ion binding; lysine N-methyltransferase activity; protein-lysine N-methyltransferase activity; transferase activity, transferring one-carbon groups; zinc ion binding; histone-lysine N-methyltransferase activity; heterocyclic compound binding; regulatory region DNA binding; organic cyclic compound b…	K09187	MLL2; histone-lysine N-methyltransferase MLL2 [EC:2.1.1.43]	hsa00310 Lysine degradation - Homo sapiens (human);	IPR001214; IPR001841; IPR001965; IPR003889; IPR003888; IPR003616; IPR009071; IPR013083; IPR011011; IPR019787;	Zinc finger, PHD-type; Zinc finger, PHD-finger; Post-SET domain; Zinc finger, FYVE/PHD-type; Zinc finger, RING-type; High mobility group box domain; FY-rich, C-terminal; FY-rich, N-terminal; Zinc finger, RING/FYVE/PHD-type; SET domain;	UTX-MLL2/3 complex; WDR5-ASH2L-RBBP5-MLL2 complex; ASCOM complex; MOF complex;
O14686	1606	S	Histone-lysine N-methyltransferase 2D	KMT2D		1.796	1.902			1.308			1.45413	1.45413		......SP...R.	LRNLTMSPLHKRR	nucl	reproductive process; chordate embryonic development; positive regulation of biosynthetic process; cellular metabolic process; protein alkylation; metabolic process; single organism reproductive process; response to steroid hormone stimulus; response to endogenous stimulus; macromolecule metabolic process; protein metabolic process; negative regulation of macromolecule biosynthetic process; embry…	intracellular organelle; intracellular organelle part; nuclear lumen; macromolecular complex; histone methyltransferase complex; intracellular part; cell; organelle part; methyltransferase complex; membrane-enclosed lumen; intracellular membrane-bounded organelle; organelle; nucleoplasm; nucleus; intracellular organelle lumen; cell part; intracellular; membrane-bounded organelle; protein complex;…	DNA binding; S-adenosylmethionine-dependent methyltransferase activity; methyltransferase activity; ion binding; lysine N-methyltransferase activity; protein-lysine N-methyltransferase activity; transferase activity, transferring one-carbon groups; zinc ion binding; histone-lysine N-methyltransferase activity; heterocyclic compound binding; regulatory region DNA binding; organic cyclic compound b…	K09187	MLL2; histone-lysine N-methyltransferase MLL2 [EC:2.1.1.43]	hsa00310 Lysine degradation - Homo sapiens (human);	IPR001214; IPR001841; IPR001965; IPR003889; IPR003888; IPR003616; IPR009071; IPR013083; IPR011011; IPR019787;	Zinc finger, PHD-type; Zinc finger, PHD-finger; Post-SET domain; Zinc finger, FYVE/PHD-type; Zinc finger, RING-type; High mobility group box domain; FY-rich, C-terminal; FY-rich, N-terminal; Zinc finger, RING/FYVE/PHD-type; SET domain;	UTX-MLL2/3 complex; WDR5-ASH2L-RBBP5-MLL2 complex; ASCOM complex; MOF complex;
O14686	1671	S	Histone-lysine N-methyltransferase 2D	KMT2D	1.244					1.308						....P.SP.....	KLEGPVSPDVEPG	nucl	reproductive process; chordate embryonic development; positive regulation of biosynthetic process; cellular metabolic process; protein alkylation; metabolic process; single organism reproductive process; response to steroid hormone stimulus; response to endogenous stimulus; macromolecule metabolic process; protein metabolic process; negative regulation of macromolecule biosynthetic process; embry…	intracellular organelle; intracellular organelle part; nuclear lumen; macromolecular complex; histone methyltransferase complex; intracellular part; cell; organelle part; methyltransferase complex; membrane-enclosed lumen; intracellular membrane-bounded organelle; organelle; nucleoplasm; nucleus; intracellular organelle lumen; cell part; intracellular; membrane-bounded organelle; protein complex;…	DNA binding; S-adenosylmethionine-dependent methyltransferase activity; methyltransferase activity; ion binding; lysine N-methyltransferase activity; protein-lysine N-methyltransferase activity; transferase activity, transferring one-carbon groups; zinc ion binding; histone-lysine N-methyltransferase activity; heterocyclic compound binding; regulatory region DNA binding; organic cyclic compound b…	K09187	MLL2; histone-lysine N-methyltransferase MLL2 [EC:2.1.1.43]	hsa00310 Lysine degradation - Homo sapiens (human);	IPR001214; IPR001841; IPR001965; IPR003889; IPR003888; IPR003616; IPR009071; IPR013083; IPR011011; IPR019787;	Zinc finger, PHD-type; Zinc finger, PHD-finger; Post-SET domain; Zinc finger, FYVE/PHD-type; Zinc finger, RING-type; High mobility group box domain; FY-rich, C-terminal; FY-rich, N-terminal; Zinc finger, RING/FYVE/PHD-type; SET domain;	UTX-MLL2/3 complex; WDR5-ASH2L-RBBP5-MLL2 complex; ASCOM complex; MOF complex;
O14686	2229	T	Histone-lysine N-methyltransferase 2D	KMT2D	1.242	1.557				1.308						......TPP....	PGEFHTTPPGTPR	nucl	reproductive process; chordate embryonic development; positive regulation of biosynthetic process; cellular metabolic process; protein alkylation; metabolic process; single organism reproductive process; response to steroid hormone stimulus; response to endogenous stimulus; macromolecule metabolic process; protein metabolic process; negative regulation of macromolecule biosynthetic process; embry…	intracellular organelle; intracellular organelle part; nuclear lumen; macromolecular complex; histone methyltransferase complex; intracellular part; cell; organelle part; methyltransferase complex; membrane-enclosed lumen; intracellular membrane-bounded organelle; organelle; nucleoplasm; nucleus; intracellular organelle lumen; cell part; intracellular; membrane-bounded organelle; protein complex;…	DNA binding; S-adenosylmethionine-dependent methyltransferase activity; methyltransferase activity; ion binding; lysine N-methyltransferase activity; protein-lysine N-methyltransferase activity; transferase activity, transferring one-carbon groups; zinc ion binding; histone-lysine N-methyltransferase activity; heterocyclic compound binding; regulatory region DNA binding; organic cyclic compound b…	K09187	MLL2; histone-lysine N-methyltransferase MLL2 [EC:2.1.1.43]	hsa00310 Lysine degradation - Homo sapiens (human);	IPR001214; IPR001841; IPR001965; IPR003889; IPR003888; IPR003616; IPR009071; IPR013083; IPR011011; IPR019787;	Zinc finger, PHD-type; Zinc finger, PHD-finger; Post-SET domain; Zinc finger, FYVE/PHD-type; Zinc finger, RING-type; High mobility group box domain; FY-rich, C-terminal; FY-rich, N-terminal; Zinc finger, RING/FYVE/PHD-type; SET domain;	UTX-MLL2/3 complex; WDR5-ASH2L-RBBP5-MLL2 complex; ASCOM complex; MOF complex;
O14686	2240	T	Histone-lysine N-methyltransferase 2D	KMT2D	3.475					1.308						....P.TP.....	PRHQPSTPDPFLK	nucl	reproductive process; chordate embryonic development; positive regulation of biosynthetic process; cellular metabolic process; protein alkylation; metabolic process; single organism reproductive process; response to steroid hormone stimulus; response to endogenous stimulus; macromolecule metabolic process; protein metabolic process; negative regulation of macromolecule biosynthetic process; embry…	intracellular organelle; intracellular organelle part; nuclear lumen; macromolecular complex; histone methyltransferase complex; intracellular part; cell; organelle part; methyltransferase complex; membrane-enclosed lumen; intracellular membrane-bounded organelle; organelle; nucleoplasm; nucleus; intracellular organelle lumen; cell part; intracellular; membrane-bounded organelle; protein complex;…	DNA binding; S-adenosylmethionine-dependent methyltransferase activity; methyltransferase activity; ion binding; lysine N-methyltransferase activity; protein-lysine N-methyltransferase activity; transferase activity, transferring one-carbon groups; zinc ion binding; histone-lysine N-methyltransferase activity; heterocyclic compound binding; regulatory region DNA binding; organic cyclic compound b…	K09187	MLL2; histone-lysine N-methyltransferase MLL2 [EC:2.1.1.43]	hsa00310 Lysine degradation - Homo sapiens (human);	IPR001214; IPR001841; IPR001965; IPR003889; IPR003888; IPR003616; IPR009071; IPR013083; IPR011011; IPR019787;	Zinc finger, PHD-type; Zinc finger, PHD-finger; Post-SET domain; Zinc finger, FYVE/PHD-type; Zinc finger, RING-type; High mobility group box domain; FY-rich, C-terminal; FY-rich, N-terminal; Zinc finger, RING/FYVE/PHD-type; SET domain;	UTX-MLL2/3 complex; WDR5-ASH2L-RBBP5-MLL2 complex; ASCOM complex; MOF complex;
O14686	3130	S	Histone-lysine N-methyltransferase 2D	KMT2D	1.883					1.308						...R..SP.....	EGGRHPSPCQFTI	nucl	reproductive process; chordate embryonic development; positive regulation of biosynthetic process; cellular metabolic process; protein alkylation; metabolic process; single organism reproductive process; response to steroid hormone stimulus; response to endogenous stimulus; macromolecule metabolic process; protein metabolic process; negative regulation of macromolecule biosynthetic process; embry…	intracellular organelle; intracellular organelle part; nuclear lumen; macromolecular complex; histone methyltransferase complex; intracellular part; cell; organelle part; methyltransferase complex; membrane-enclosed lumen; intracellular membrane-bounded organelle; organelle; nucleoplasm; nucleus; intracellular organelle lumen; cell part; intracellular; membrane-bounded organelle; protein complex;…	DNA binding; S-adenosylmethionine-dependent methyltransferase activity; methyltransferase activity; ion binding; lysine N-methyltransferase activity; protein-lysine N-methyltransferase activity; transferase activity, transferring one-carbon groups; zinc ion binding; histone-lysine N-methyltransferase activity; heterocyclic compound binding; regulatory region DNA binding; organic cyclic compound b…	K09187	MLL2; histone-lysine N-methyltransferase MLL2 [EC:2.1.1.43]	hsa00310 Lysine degradation - Homo sapiens (human);	IPR001214; IPR001841; IPR001965; IPR003889; IPR003888; IPR003616; IPR009071; IPR013083; IPR011011; IPR019787;	Zinc finger, PHD-type; Zinc finger, PHD-finger; Post-SET domain; Zinc finger, FYVE/PHD-type; Zinc finger, RING-type; High mobility group box domain; FY-rich, C-terminal; FY-rich, N-terminal; Zinc finger, RING/FYVE/PHD-type; SET domain;	UTX-MLL2/3 complex; WDR5-ASH2L-RBBP5-MLL2 complex; ASCOM complex; MOF complex;
O14686	4359	S	Histone-lysine N-methyltransferase 2D	KMT2D	1.104	1.342	1.07			1.308			0.818043	0.818043		...G..SP.....	PPPGRVSPAAAQL	nucl	reproductive process; chordate embryonic development; positive regulation of biosynthetic process; cellular metabolic process; protein alkylation; metabolic process; single organism reproductive process; response to steroid hormone stimulus; response to endogenous stimulus; macromolecule metabolic process; protein metabolic process; negative regulation of macromolecule biosynthetic process; embry…	intracellular organelle; intracellular organelle part; nuclear lumen; macromolecular complex; histone methyltransferase complex; intracellular part; cell; organelle part; methyltransferase complex; membrane-enclosed lumen; intracellular membrane-bounded organelle; organelle; nucleoplasm; nucleus; intracellular organelle lumen; cell part; intracellular; membrane-bounded organelle; protein complex;…	DNA binding; S-adenosylmethionine-dependent methyltransferase activity; methyltransferase activity; ion binding; lysine N-methyltransferase activity; protein-lysine N-methyltransferase activity; transferase activity, transferring one-carbon groups; zinc ion binding; histone-lysine N-methyltransferase activity; heterocyclic compound binding; regulatory region DNA binding; organic cyclic compound b…	K09187	MLL2; histone-lysine N-methyltransferase MLL2 [EC:2.1.1.43]	hsa00310 Lysine degradation - Homo sapiens (human);	IPR001214; IPR001841; IPR001965; IPR003889; IPR003888; IPR003616; IPR009071; IPR013083; IPR011011; IPR019787;	Zinc finger, PHD-type; Zinc finger, PHD-finger; Post-SET domain; Zinc finger, FYVE/PHD-type; Zinc finger, RING-type; High mobility group box domain; FY-rich, C-terminal; FY-rich, N-terminal; Zinc finger, RING/FYVE/PHD-type; SET domain;	UTX-MLL2/3 complex; WDR5-ASH2L-RBBP5-MLL2 complex; ASCOM complex; MOF complex;
O14686	4682	T	Histone-lysine N-methyltransferase 2D	KMT2D						1.308						......TPP....	LLAALPTPPHNQT	nucl	reproductive process; chordate embryonic development; positive regulation of biosynthetic process; cellular metabolic process; protein alkylation; metabolic process; single organism reproductive process; response to steroid hormone stimulus; response to endogenous stimulus; macromolecule metabolic process; protein metabolic process; negative regulation of macromolecule biosynthetic process; embry…	intracellular organelle; intracellular organelle part; nuclear lumen; macromolecular complex; histone methyltransferase complex; intracellular part; cell; organelle part; methyltransferase complex; membrane-enclosed lumen; intracellular membrane-bounded organelle; organelle; nucleoplasm; nucleus; intracellular organelle lumen; cell part; intracellular; membrane-bounded organelle; protein complex;…	DNA binding; S-adenosylmethionine-dependent methyltransferase activity; methyltransferase activity; ion binding; lysine N-methyltransferase activity; protein-lysine N-methyltransferase activity; transferase activity, transferring one-carbon groups; zinc ion binding; histone-lysine N-methyltransferase activity; heterocyclic compound binding; regulatory region DNA binding; organic cyclic compound b…	K09187	MLL2; histone-lysine N-methyltransferase MLL2 [EC:2.1.1.43]	hsa00310 Lysine degradation - Homo sapiens (human);	IPR001214; IPR001841; IPR001965; IPR003889; IPR003888; IPR003616; IPR009071; IPR013083; IPR011011; IPR019787;	Zinc finger, PHD-type; Zinc finger, PHD-finger; Post-SET domain; Zinc finger, FYVE/PHD-type; Zinc finger, RING-type; High mobility group box domain; FY-rich, C-terminal; FY-rich, N-terminal; Zinc finger, RING/FYVE/PHD-type; SET domain;	UTX-MLL2/3 complex; WDR5-ASH2L-RBBP5-MLL2 complex; ASCOM complex; MOF complex;
O14686	4738	S	Histone-lysine N-methyltransferase 2D	KMT2D	1.067	1.048	1.042			1.308			0.796636	0.796636		...R..SP.....	QEDRALSPVIPLI	nucl	reproductive process; chordate embryonic development; positive regulation of biosynthetic process; cellular metabolic process; protein alkylation; metabolic process; single organism reproductive process; response to steroid hormone stimulus; response to endogenous stimulus; macromolecule metabolic process; protein metabolic process; negative regulation of macromolecule biosynthetic process; embry…	intracellular organelle; intracellular organelle part; nuclear lumen; macromolecular complex; histone methyltransferase complex; intracellular part; cell; organelle part; methyltransferase complex; membrane-enclosed lumen; intracellular membrane-bounded organelle; organelle; nucleoplasm; nucleus; intracellular organelle lumen; cell part; intracellular; membrane-bounded organelle; protein complex;…	DNA binding; S-adenosylmethionine-dependent methyltransferase activity; methyltransferase activity; ion binding; lysine N-methyltransferase activity; protein-lysine N-methyltransferase activity; transferase activity, transferring one-carbon groups; zinc ion binding; histone-lysine N-methyltransferase activity; heterocyclic compound binding; regulatory region DNA binding; organic cyclic compound b…	K09187	MLL2; histone-lysine N-methyltransferase MLL2 [EC:2.1.1.43]	hsa00310 Lysine degradation - Homo sapiens (human);	IPR001214; IPR001841; IPR001965; IPR003889; IPR003888; IPR003616; IPR009071; IPR013083; IPR011011; IPR019787;	Zinc finger, PHD-type; Zinc finger, PHD-finger; Post-SET domain; Zinc finger, FYVE/PHD-type; Zinc finger, RING-type; High mobility group box domain; FY-rich, C-terminal; FY-rich, N-terminal; Zinc finger, RING/FYVE/PHD-type; SET domain;	UTX-MLL2/3 complex; WDR5-ASH2L-RBBP5-MLL2 complex; ASCOM complex; MOF complex;
O14686	4822	S	Histone-lysine N-methyltransferase 2D	KMT2D	1.305	1.368	1.503			1.308			1.14908	1.14908		....P.SP.....	EVLFPESPARAGT	nucl	reproductive process; chordate embryonic development; positive regulation of biosynthetic process; cellular metabolic process; protein alkylation; metabolic process; single organism reproductive process; response to steroid hormone stimulus; response to endogenous stimulus; macromolecule metabolic process; protein metabolic process; negative regulation of macromolecule biosynthetic process; embry…	intracellular organelle; intracellular organelle part; nuclear lumen; macromolecular complex; histone methyltransferase complex; intracellular part; cell; organelle part; methyltransferase complex; membrane-enclosed lumen; intracellular membrane-bounded organelle; organelle; nucleoplasm; nucleus; intracellular organelle lumen; cell part; intracellular; membrane-bounded organelle; protein complex;…	DNA binding; S-adenosylmethionine-dependent methyltransferase activity; methyltransferase activity; ion binding; lysine N-methyltransferase activity; protein-lysine N-methyltransferase activity; transferase activity, transferring one-carbon groups; zinc ion binding; histone-lysine N-methyltransferase activity; heterocyclic compound binding; regulatory region DNA binding; organic cyclic compound b…	K09187	MLL2; histone-lysine N-methyltransferase MLL2 [EC:2.1.1.43]	hsa00310 Lysine degradation - Homo sapiens (human);	IPR001214; IPR001841; IPR001965; IPR003889; IPR003888; IPR003616; IPR009071; IPR013083; IPR011011; IPR019787;	Zinc finger, PHD-type; Zinc finger, PHD-finger; Post-SET domain; Zinc finger, FYVE/PHD-type; Zinc finger, RING-type; High mobility group box domain; FY-rich, C-terminal; FY-rich, N-terminal; Zinc finger, RING/FYVE/PHD-type; SET domain;	UTX-MLL2/3 complex; WDR5-ASH2L-RBBP5-MLL2 complex; ASCOM complex; MOF complex;
O14686	4849	S	Histone-lysine N-methyltransferase 2D	KMT2D	0.773	1.14	1.101			1.308			0.841743	0.841743		.....KSP.....	KGLEGKSPDTGPD	nucl	reproductive process; chordate embryonic development; positive regulation of biosynthetic process; cellular metabolic process; protein alkylation; metabolic process; single organism reproductive process; response to steroid hormone stimulus; response to endogenous stimulus; macromolecule metabolic process; protein metabolic process; negative regulation of macromolecule biosynthetic process; embry…	intracellular organelle; intracellular organelle part; nuclear lumen; macromolecular complex; histone methyltransferase complex; intracellular part; cell; organelle part; methyltransferase complex; membrane-enclosed lumen; intracellular membrane-bounded organelle; organelle; nucleoplasm; nucleus; intracellular organelle lumen; cell part; intracellular; membrane-bounded organelle; protein complex;…	DNA binding; S-adenosylmethionine-dependent methyltransferase activity; methyltransferase activity; ion binding; lysine N-methyltransferase activity; protein-lysine N-methyltransferase activity; transferase activity, transferring one-carbon groups; zinc ion binding; histone-lysine N-methyltransferase activity; heterocyclic compound binding; regulatory region DNA binding; organic cyclic compound b…	K09187	MLL2; histone-lysine N-methyltransferase MLL2 [EC:2.1.1.43]	hsa00310 Lysine degradation - Homo sapiens (human);	IPR001214; IPR001841; IPR001965; IPR003889; IPR003888; IPR003616; IPR009071; IPR013083; IPR011011; IPR019787;	Zinc finger, PHD-type; Zinc finger, PHD-finger; Post-SET domain; Zinc finger, FYVE/PHD-type; Zinc finger, RING-type; High mobility group box domain; FY-rich, C-terminal; FY-rich, N-terminal; Zinc finger, RING/FYVE/PHD-type; SET domain;	UTX-MLL2/3 complex; WDR5-ASH2L-RBBP5-MLL2 complex; ASCOM complex; MOF complex;
O14730	8	S	Serine/threonine-protein kinase RIO3	RIOK3		3.281		1.451	1.346	1.468		2.43759		2.43759		...G..SP.....	DLVGVASPEPGTA	cyto	single-organism cellular process; single-organism process; chromosome segregation; cellular process;		ATP binding; nucleoside phosphate binding; phosphotransferase activity, alcohol group as acceptor; nucleoside binding; ion binding; protein kinase activity; nucleotide binding; organic cyclic compound binding; heterocyclic compound binding; ribonucleoside binding; kinase activity; catalytic activity; ribonucleotide binding; binding; purine ribonucleoside binding; protein serine/threonine kinase a…	K08872			IPR018934; IPR000687; IPR011009;	RIO-like kinase; Protein kinase-like domain; RIO kinase;
O14737	80	Y	Programmed cell death protein 5	PDCD5		1.27	1.164	1.071	1.058	1.075		1.20038	1.08279	1.14158			#N/A	cyto	single-organism cellular process; single-organism process; programmed cell death; death; cell death; cellular process; apoptotic process;	organelle; intracellular membrane-bounded organelle; intracellular organelle; nucleus; cell part; intracellular; cytoplasm; intracellular part; membrane-bounded organelle; cell;	organic cyclic compound binding; heterocyclic compound binding; DNA binding; binding; nucleic acid binding;	K06875
O14737	119	S	Programmed cell death protein 5	PDCD5	1.136	1.131		1.071	1.058	1.075	1.06069	1.069		1.06484		......S.E....	RRKVMDSDEDDDY	cyto	single-organism cellular process; single-organism process; programmed cell death; death; cell death; cellular process; apoptotic process;	organelle; intracellular membrane-bounded organelle; intracellular organelle; nucleus; cell part; intracellular; cytoplasm; intracellular part; membrane-bounded organelle; cell;	organic cyclic compound binding; heterocyclic compound binding; DNA binding; binding; nucleic acid binding;	K06875
O14745	2	S	Na(+)/H(+) exchange regulatory cofactor NHE-RF1	SLC9A3R1		0.702	0.709	0.849	0.864	0.879		0.8125	0.806598	0.809549			-----MSADAAAG	nucl	cellular component biogenesis; single organism signaling; modified amino acid transport; regulation of biological quality; regulation of protein kinase B signaling cascade; renal absorption; cell surface receptor signaling pathway; cellular trivalent inorganic anion homeostasis; phosphate ion homeostasis; negative regulation of sodium ion transport; glutathione transport; negative regulation of c…	membrane; brush border; apical plasma membrane; cell periphery; cytoplasm; intracellular part; cell; organelle part; non-membrane-bounded organelle; cytoskeleton; microtubule organizing center; microtubule cytoskeleton; intracellular; cell part; membrane part; filopodium; membrane-bounded organelle; microvillus membrane; apical part of cell; cell leading edge; intracellular organelle; cell projec…	protein binding; protein self-association; channel regulator activity; binding; chloride channel regulator activity;	K13365			IPR015098; IPR001478;	EBP50, C-terminal; PDZ domain;	C-CFTR-NHERF-ezrin complex; 2-NHERF-ezrin complex; CFTR-NHERF-betaAR signaling complex;
O14745	280	S	Na(+)/H(+) exchange regulatory cofactor NHE-RF1	SLC9A3R1	1.33	1.27	1.253	0.849	0.864	0.879	1.56655	1.46991	1.42548	1.48731	0.00729909	......SP.....	AEAALESPRPALV	nucl	cellular component biogenesis; single organism signaling; modified amino acid transport; regulation of biological quality; regulation of protein kinase B signaling cascade; renal absorption; cell surface receptor signaling pathway; cellular trivalent inorganic anion homeostasis; phosphate ion homeostasis; negative regulation of sodium ion transport; glutathione transport; negative regulation of c…	membrane; brush border; apical plasma membrane; cell periphery; cytoplasm; intracellular part; cell; organelle part; non-membrane-bounded organelle; cytoskeleton; microtubule organizing center; microtubule cytoskeleton; intracellular; cell part; membrane part; filopodium; membrane-bounded organelle; microvillus membrane; apical part of cell; cell leading edge; intracellular organelle; cell projec…	protein binding; protein self-association; channel regulator activity; binding; chloride channel regulator activity;	K13365			IPR015098; IPR001478;	EBP50, C-terminal; PDZ domain;	C-CFTR-NHERF-ezrin complex; 2-NHERF-ezrin complex; CFTR-NHERF-betaAR signaling complex;
O14745	290	S	Na(+)/H(+) exchange regulatory cofactor NHE-RF1	SLC9A3R1	1.027	1.075	1.055	0.849	0.864	0.879	1.20966	1.24421	1.20023	1.21803	0.00457939	...RS.S......	ALVRSASSDTSEE	nucl	cellular component biogenesis; single organism signaling; modified amino acid transport; regulation of biological quality; regulation of protein kinase B signaling cascade; renal absorption; cell surface receptor signaling pathway; cellular trivalent inorganic anion homeostasis; phosphate ion homeostasis; negative regulation of sodium ion transport; glutathione transport; negative regulation of c…	membrane; brush border; apical plasma membrane; cell periphery; cytoplasm; intracellular part; cell; organelle part; non-membrane-bounded organelle; cytoskeleton; microtubule organizing center; microtubule cytoskeleton; intracellular; cell part; membrane part; filopodium; membrane-bounded organelle; microvillus membrane; apical part of cell; cell leading edge; intracellular organelle; cell projec…	protein binding; protein self-association; channel regulator activity; binding; chloride channel regulator activity;	K13365			IPR015098; IPR001478;	EBP50, C-terminal; PDZ domain;	C-CFTR-NHERF-ezrin complex; 2-NHERF-ezrin complex; CFTR-NHERF-betaAR signaling complex;
O14757	280	S	Serine/threonine-protein kinase Chk1	CHEK1			1.493		0.98	0.907			1.64609	1.64609		.R.R..S......	KRPRVTSGGVSES	cyto	cellular response to UV; positive regulation of biosynthetic process; regulation of cell cycle process; cellular metabolic process; response to external stimulus; metabolic process; negative regulation of nuclear division; response to endogenous stimulus; cell cycle phase transition; regulation of cytoskeleton organization; macromolecule metabolic process; protein metabolic process; regulation of…	cytoplasm; intracellular part; cell; organelle part; chromosomal part; non-membrane-bounded organelle; membrane-enclosed lumen; condensed chromosome; cytoskeleton; nucleoplasm; microtubule organizing center; intracellular organelle lumen; microtubule cytoskeleton; cell part; intracellular; chromosome; membrane-bounded organelle; organelle lumen; replication fork; intracellular organelle; intracel…	ATP binding; nucleoside phosphate binding; phosphotransferase activity, alcohol group as acceptor; nucleoside binding; ion binding; histone kinase activity; protein kinase activity; nucleotide binding; organic cyclic compound binding; heterocyclic compound binding; ribonucleoside binding; histone kinase activity (H3-T11 specific); kinase activity; catalytic activity; ribonucleotide binding; bindi…	K02216	CHK1; serine/threonine-protein kinase Chk1 [EC:2.7.11.1]	hsa04110 Cell cycle - Homo sapiens (human); hsa05166 HTLV-I infection - Homo sapiens (human); hsa04115 p53 signaling pathway - Homo sapiens (human); hsa05203 Viral carcinogenesis - Homo sapiens (human);	IPR000719; IPR002290; IPR011009;	Protein kinase domain; Protein kinase-like domain; Serine/threonine- /dual specificity protein kinase, catalytic domain;	Ubiquitin E3 ligase;
O14777	77	S	Kinetochore protein NDC80 homolog	NDC80			3.207	1.191	1.156	1.287			2.49184	2.49184			LGIFSSSEKIKDP	mito	single organism signaling; establishment of mitotic spindle orientation; regulation of biological quality; microtubule anchoring; mitosis; single-organism process; establishment of localization; inositol lipid-mediated signaling; signal transduction; sister chromatid segregation; establishment of localization in cell; cell communication; attachment of spindle microtubules to kinetochore; macromol…	cytoplasm; macromolecular complex; intracellular part; cell; condensed chromosome outer kinetochore; condensed chromosome kinetochore; organelle part; non-membrane-bounded organelle; chromosomal part; membrane-enclosed lumen; condensed chromosome; intracellular organelle lumen; nuclear chromosome part; cell part; intracellular; chromosome; membrane-bounded organelle; kinetochore; organelle lumen;…		K11547					NDC80 kinetochore complex;
O14795	436	S	Protein unc-13 homolog B	UNC13B				1.086	0.948								DLSLVQSRKAGIT	nucl	cellular component biogenesis; neuromuscular junction development; single organism signaling; regulation of neurotransmitter levels; regulation of biological quality; muscle fiber development; regulation of signaling; cellular developmental process; neurotransmitter secretion; single-organism process; regulation of short-term neuronal synaptic plasticity; neuron-neuron synaptic transmission; neur…	membrane; intracellular organelle; cell periphery; neuromuscular junction; cell junction; cytoplasm; intracellular part; cell; plasma membrane; synapse; intracellular membrane-bounded organelle; organelle; intracellular; cell part; membrane-bounded organelle; Golgi apparatus; cytoplasmic part;	metal ion binding; cation binding; molecular transducer activity; receptor activity; signal transducer activity; binding; ion binding;	K15293	UNC13; protein unc-13	hsa04721 Synaptic vesicle cycle - Homo sapiens (human);	IPR014770; IPR002219; IPR014772; IPR010439; IPR019558; IPR000008;	Mammalian uncoordinated homology 13, domain 2; Mammalian uncoordinated homology 13, subgroup, domain 2; Calcium-dependent secretion activator; Munc13 homology 1; Protein kinase C-like, phorbol ester/diacylglycerol binding; C2 domain;
O14828	32	S	Secretory carrier-associated membrane protein 3	SCAMP3	1.23	1.267	1.219	0.935	0.896	0.889	1.31551	1.41406	1.3712	1.36692	0.00667792	....R.S......	VIQHRPSRQYATL	plas	intracellular transport; vesicle-mediated transport; response to oxygen-containing compound; single-organism cellular process; single-organism process; Golgi vesicle transport; organic substance transport; response to organic substance; response to stimulus; protein transport; establishment of localization; cellular localization; transport; establishment of protein localization; response to lipid…	membrane; intracellular organelle; organelle membrane; cytoplasm; intracellular organelle part; Golgi membrane; intrinsic to membrane; endomembrane system; intracellular part; cell; integral to membrane; organelle part; intracellular membrane-bounded organelle; organelle; membrane part; cell part; intracellular; Golgi apparatus part; membrane-bounded organelle; Golgi apparatus; cytoplasmic part;							SCAMP1-SCAMP2-SCAMP3 complex;
O14828	72	S	Secretory carrier-associated membrane protein 3	SCAMP3		1.683	1.598	0.935	0.896	0.889		1.87835	1.79753	1.83794			APSLQPSRKLSPT	plas	intracellular transport; vesicle-mediated transport; response to oxygen-containing compound; single-organism cellular process; single-organism process; Golgi vesicle transport; organic substance transport; response to organic substance; response to stimulus; protein transport; establishment of localization; cellular localization; transport; establishment of protein localization; response to lipid…	membrane; intracellular organelle; organelle membrane; cytoplasm; intracellular organelle part; Golgi membrane; intrinsic to membrane; endomembrane system; intracellular part; cell; integral to membrane; organelle part; intracellular membrane-bounded organelle; organelle; membrane part; cell part; intracellular; Golgi apparatus part; membrane-bounded organelle; Golgi apparatus; cytoplasmic part;							SCAMP1-SCAMP2-SCAMP3 complex;
O14828	76	S	Secretory carrier-associated membrane protein 3	SCAMP3	2.382	2.483	2.391	0.935	0.896	0.889	2.54759	2.77121	2.68954	2.66945	0.000943136	...R..SP.....	QPSRKLSPTEPKN	plas	intracellular transport; vesicle-mediated transport; response to oxygen-containing compound; single-organism cellular process; single-organism process; Golgi vesicle transport; organic substance transport; response to organic substance; response to stimulus; protein transport; establishment of localization; cellular localization; transport; establishment of protein localization; response to lipid…	membrane; intracellular organelle; organelle membrane; cytoplasm; intracellular organelle part; Golgi membrane; intrinsic to membrane; endomembrane system; intracellular part; cell; integral to membrane; organelle part; intracellular membrane-bounded organelle; organelle; membrane part; cell part; intracellular; Golgi apparatus part; membrane-bounded organelle; Golgi apparatus; cytoplasmic part;							SCAMP1-SCAMP2-SCAMP3 complex;
O14828	85	S	Secretory carrier-associated membrane protein 3	SCAMP3	1.271	1.177	1.159	0.935	0.896	0.889	1.35936	1.31362	1.30371	1.32556	0.00311117	.....GS......	EPKNYGSYSTQAS	plas	intracellular transport; vesicle-mediated transport; response to oxygen-containing compound; single-organism cellular process; single-organism process; Golgi vesicle transport; organic substance transport; response to organic substance; response to stimulus; protein transport; establishment of localization; cellular localization; transport; establishment of protein localization; response to lipid…	membrane; intracellular organelle; organelle membrane; cytoplasm; intracellular organelle part; Golgi membrane; intrinsic to membrane; endomembrane system; intracellular part; cell; integral to membrane; organelle part; intracellular membrane-bounded organelle; organelle; membrane part; cell part; intracellular; Golgi apparatus part; membrane-bounded organelle; Golgi apparatus; cytoplasmic part;							SCAMP1-SCAMP2-SCAMP3 complex;
O14874	31	S	[3-methyl-2-oxobutanoate dehydrogenase [lipoamide]] kinase, mitochondrial	BCKDK	0.907	0.906	0.749	1.39	1.127	1.126	0.652518	0.803904	0.665187	0.707203	0.0499638	...R..S......	LALRARSTSATDT	mito	single-organism catabolic process; small molecule metabolic process; nitrogen compound metabolic process; small molecule catabolic process; primary metabolic process; cellular metabolic process; organic substance metabolic process; carboxylic acid catabolic process; organic substance catabolic process; branched-chain amino acid catabolic process; metabolic process; organonitrogen compound catabol…	intracellular organelle; mitochondrial matrix; mitochondrial part; cytoplasm; intracellular organelle part; macromolecular complex; intracellular part; cell; mitochondrion; organelle part; dihydrolipoyl dehydrogenase complex; membrane-enclosed lumen; organelle; intracellular membrane-bounded organelle; intracellular organelle lumen; intracellular; cell part; mitochondrial tricarboxylic acid cycle…	ATP binding; nucleoside phosphate binding; phosphotransferase activity, alcohol group as acceptor; [3-methyl-2-oxobutanoate dehydrogenase (acetyl-transferring)] kinase activity; nucleoside binding; ion binding; nucleotide binding; protein kinase activity; organic cyclic compound binding; heterocyclic compound binding; ribonucleoside binding; kinase activity; catalytic activity; ribonucleotide bin…	K00905			IPR005467; IPR003594; IPR018955; IPR004358;	Branched-chain alpha-ketoacid dehydrogenase kinase/Pyruvate dehydrogenase kinase, N-terminal; Signal transduction histidine kinase, core; Signal transduction histidine kinase-related protein, C-terminal; Histidine kinase-like ATPase, ATP-binding domain;
O14908	222	S	PDZ domain-containing protein GIPC1	GIPC1	1.696			1.037	1.133	1.058	1.63549			1.63549			KAFDMISQRSAGG	nucl	single organism signaling; regulation of biological quality; tissue migration; localization of cell; cell surface receptor signaling pathway; posttranscriptional regulation of gene expression; regulation of signaling; single-organism process; neurological system process; protein transport; establishment of localization; protein targeting; positive regulation of transmembrane receptor protein seri…	membrane; dendrite; cell cortex; brush border; organelle membrane; cytoplasmic vesicle; membrane-bounded vesicle; cell periphery; cytoplasmic membrane-bounded vesicle; vesicle; cytoplasm; intracellular part; cell; organelle part; dendritic spine; neuron spine; clathrin-coated vesicle; synaptic vesicle; cell part; intracellular; neuron projection; cytosolic part; endocytic vesicle; membrane-bounde…	identical protein binding; cytoskeletal protein binding; protein homodimerization activity; binding; protein dimerization activity; actin binding; protein binding; myosin binding;				IPR001478;	PDZ domain;	GIPC1-NTRK1-RGS19 complex; GIPC1-LHCGR complex;
O14908	225	S	PDZ domain-containing protein GIPC1	GIPC1	1.63			1.037	1.133	1.058	1.57184			1.57184			DMISQRSAGGRPG	nucl	single organism signaling; regulation of biological quality; tissue migration; localization of cell; cell surface receptor signaling pathway; posttranscriptional regulation of gene expression; regulation of signaling; single-organism process; neurological system process; protein transport; establishment of localization; protein targeting; positive regulation of transmembrane receptor protein seri…	membrane; dendrite; cell cortex; brush border; organelle membrane; cytoplasmic vesicle; membrane-bounded vesicle; cell periphery; cytoplasmic membrane-bounded vesicle; vesicle; cytoplasm; intracellular part; cell; organelle part; dendritic spine; neuron spine; clathrin-coated vesicle; synaptic vesicle; cell part; intracellular; neuron projection; cytosolic part; endocytic vesicle; membrane-bounde…	identical protein binding; cytoskeletal protein binding; protein homodimerization activity; binding; protein dimerization activity; actin binding; protein binding; myosin binding;				IPR001478;	PDZ domain;	GIPC1-NTRK1-RGS19 complex; GIPC1-LHCGR complex;
O14920	672	S	Inhibitor of nuclear factor kappa-B kinase subunit beta	IKBKB	0.707	0.686	0.711	0.783	0.804	0.763	0.902937	0.853234	0.931848	0.896006	0.0728954	......SP.....	RGPVSGSPDSMNA	cyto	single organism signaling; positive regulation of type I interferon production; regulation of biological quality; cell surface receptor signaling pathway; positive regulation of biosynthetic process; nucleotide-binding domain, leucine rich repeat containing receptor signaling pathway; regulation of defense response; response to biotic stimulus; nucleotide-binding oligomerization domain containing…	intracellular organelle; membrane; intrinsic to plasma membrane; cell periphery; cytoplasm; IkappaB kinase complex; receptor complex; macromolecular complex; intrinsic to membrane; intracellular part; integral to plasma membrane; cytosol; cell; internal side of plasma membrane; integral to membrane; plasma membrane; organelle; intracellular membrane-bounded organelle; nucleus; plasma membrane par…	ATP binding; nucleoside phosphate binding; phosphotransferase activity, alcohol group as acceptor; nucleoside binding; ion binding; IkappaB kinase activity; protein kinase activity; nucleotide binding; organic cyclic compound binding; heterocyclic compound binding; ribonucleoside binding; kinase activity; catalytic activity; ribonucleotide binding; binding; purine ribonucleoside binding; protein …	K07209	IKBKB; inhibitor of nuclear factor kappa-B kinase subunit beta [EC:2.7.11.10]	hsa05221 Acute myeloid leukemia - Homo sapiens (human); hsa04662 B cell receptor signaling pathway - Homo sapiens (human); hsa05220 Chronic myeloid leukemia - Homo sapiens (human); hsa04014 Ras signaling pathway - Homo sapiens (human); hsa04150 mTOR signaling pathway - Homo sapiens (human); hsa05222 Small cell lung cancer - Homo sapiens (human); hsa05166 HTLV-I infection - Homo sapiens (human); h…	IPR022007; IPR000719; IPR000626; IPR011009;	Protein kinase domain; Protein kinase-like domain; I-kappa-kinase-beta NEMO binding domain; Ubiquitin-like;	I-kappa-B kinasecomplex; TNF-alpha/NF-kappa B signaling complex 6; CHUK-IKBKB-MAP3K14 complex; CHUK-ERC1-IKBKB-IKBKG; SRC-3 complex; IkappaB kinase complex; IKBKB-CDC37-KIAA1967-HSP90AB1-HSP90AA1 complex; TNF-alpha/NF-kappa B signaling complex 5; IKKB-NIK complex; TNF-alpha/NF-kappa B signaling complex; BCL10-CHUK-BCL10-IKBKB complex; CHUK-IKBKB-IKBKG complex; IKBKG-IKBKB complex; IKKA-IKKB compl…
O14929	361	S	Histone acetyltransferase type B catalytic subunit	HAT1	0.819	0.82	0.846	0.905	0.912	0.906	0.904972	0.899123	0.933775	0.912623	0.023529	......SP.K...	IKRRLISPYKKKQ	cyto	single-organism process; cellular metabolic process; negative regulation of RNA metabolic process; response to external stimulus; regulation of RNA biosynthetic process; metabolic process; chromatin silencing at telomere; macromolecule metabolic process; negative regulation of macromolecule biosynthetic process; DNA conformation change; regulation of gene expression; regulation of cellular biosyn…	intracellular organelle; intracellular organelle part; cytoplasm; nuclear lumen; intracellular part; cell; organelle part; organelle; intracellular membrane-bounded organelle; membrane-enclosed lumen; nucleoplasm; nucleus; intracellular organelle lumen; intracellular; cell part; nuclear matrix; nuclear periphery; membrane-bounded organelle; organelle lumen; nuclear part;	transferase activity, transferring acyl groups; histone acetyltransferase activity; N-acetyltransferase activity; transferase activity, transferring acyl groups other than amino-acyl groups; transferase activity; catalytic activity; acetyltransferase activity; N-acyltransferase activity;	K11303	HAT1; histone acetyltransferase 1 [EC:2.3.1.48]	hsa05034 Alcoholism - Homo sapiens (human);	IPR019467; IPR016181;	Acyl-CoA N-acyltransferase; Histone acetyl transferase HAT1 N-terminal;	Histone H3.1 complex; Histone H3.3 complex;
O14929	363	Y	Histone acetyltransferase type B catalytic subunit	HAT1			0.75	0.905	0.912	0.906			0.827815	0.827815			#N/A	cyto	single-organism process; cellular metabolic process; negative regulation of RNA metabolic process; response to external stimulus; regulation of RNA biosynthetic process; metabolic process; chromatin silencing at telomere; macromolecule metabolic process; negative regulation of macromolecule biosynthetic process; DNA conformation change; regulation of gene expression; regulation of cellular biosyn…	intracellular organelle; intracellular organelle part; cytoplasm; nuclear lumen; intracellular part; cell; organelle part; organelle; intracellular membrane-bounded organelle; membrane-enclosed lumen; nucleoplasm; nucleus; intracellular organelle lumen; intracellular; cell part; nuclear matrix; nuclear periphery; membrane-bounded organelle; organelle lumen; nuclear part;	transferase activity, transferring acyl groups; histone acetyltransferase activity; N-acetyltransferase activity; transferase activity, transferring acyl groups other than amino-acyl groups; transferase activity; catalytic activity; acetyltransferase activity; N-acyltransferase activity;	K11303	HAT1; histone acetyltransferase 1 [EC:2.3.1.48]	hsa05034 Alcoholism - Homo sapiens (human);	IPR019467; IPR016181;	Acyl-CoA N-acyltransferase; Histone acetyl transferase HAT1 N-terminal;	Histone H3.1 complex; Histone H3.3 complex;
O14949	16	S	Cytochrome b-c1 complex subunit 8	UQCRQ				1.031	1.034	1.015							RMRHVISYSLSPF	mito	pallium development; single-multicellular organism process; subthalamus development; hippocampus development; hypothalamus development; brain development; neuron development; cellular developmental process; neurogenesis; single-organism process; respiratory electron transport chain; thalamus development; pons development; limbic system development; cellular metabolic process; forebrain neuron dev…	membrane; intracellular organelle; mitochondrial part; organelle membrane; organelle envelope; intracellular organelle part; cytoplasm; intracellular part; cell; organelle part; mitochondrion; mitochondrial envelope; intracellular membrane-bounded organelle; organelle; membrane part; cell part; intracellular; envelope; organelle inner membrane; membrane-bounded organelle; mitochondrial inner memb…	ubiquinol-cytochrome-c reductase activity; ion transmembrane transporter activity; oxidoreductase activity, acting on diphenols and related substances as donors; catalytic activity; substrate-specific transporter activity; monovalent inorganic cation transmembrane transporter activity; inorganic cation transmembrane transporter activity; hydrogen ion transmembrane transporter activity; cation tra…	K00418	QCR8; ubiquinol-cytochrome c reductase subunit 8	hsa04260 Cardiac muscle contraction - Homo sapiens (human); hsa05010 Alzheimer's disease - Homo sapiens (human); hsa05016 Huntington's disease - Homo sapiens (human); hsa04932 Non-alcoholic fatty liver disease (NAFLD) - Homo sapiens (human); hsa01100 Metabolic pathways - Homo sapiens (human); hsa00190 Oxidative phosphorylation - Homo sapiens (human); hsa05012 Parkinson's disease - Homo sapiens (h…
O14964	132	Y	Hepatocyte growth factor-regulated tyrosine kinase substrate	HGS	1.37	1.426	1.141	1.095	1.101	1.016	1.25114	1.29519	1.12303	1.22312	0.0629812		#N/A	nucl	single organism signaling; negative regulation of signal transduction; cell surface receptor signaling pathway; negative regulation of ERBB signaling pathway; regulation of signaling; single-organism process; protein transport; negative regulation of cell proliferation; establishment of localization; signal transduction; regulation of cell communication; establishment of localization in cell; cel…	membrane; endosome membrane; intracellular organelle; late endosome; cytoplasmic vesicle; organelle membrane; membrane-bounded vesicle; cytoplasmic membrane-bounded vesicle; vesicle; intracellular organelle part; cytoplasm; endosomal part; intracellular part; cytosol; cell; organelle part; early endosome; intracellular membrane-bounded organelle; organelle; late endosome membrane; multivesicular …	metal ion binding; cation binding; binding; ion binding;	K12182	HGS; hepatocyte growth factor-regulated tyrosine kinase substrate	hsa04144 Endocytosis - Homo sapiens (human); hsa04145 Phagosome - Homo sapiens (human);	IPR002014; IPR000306; IPR017455; IPR013083; IPR018205; IPR011011; IPR024641; IPR008942;	Zinc finger, FYVE-related; VHS subgroup; Zinc finger, FYVE/PHD-type; Hepatocyte growth factor-regulated tyrosine kinase substrate, helical domain; FYVE zinc finger; VHS; ENTH/VHS; Zinc finger, RING/FYVE/PHD-type;	SNARE complex; RIN1-STAM2-HRS complex;
O14964	216	Y	Hepatocyte growth factor-regulated tyrosine kinase substrate	HGS	1.214	1.182	1.006	1.095	1.101	1.016	1.10868	1.07357	0.990157	1.05747	0.315098		#N/A	nucl	single organism signaling; negative regulation of signal transduction; cell surface receptor signaling pathway; negative regulation of ERBB signaling pathway; regulation of signaling; single-organism process; protein transport; negative regulation of cell proliferation; establishment of localization; signal transduction; regulation of cell communication; establishment of localization in cell; cel…	membrane; endosome membrane; intracellular organelle; late endosome; cytoplasmic vesicle; organelle membrane; membrane-bounded vesicle; cytoplasmic membrane-bounded vesicle; vesicle; intracellular organelle part; cytoplasm; endosomal part; intracellular part; cytosol; cell; organelle part; early endosome; intracellular membrane-bounded organelle; organelle; late endosome membrane; multivesicular …	metal ion binding; cation binding; binding; ion binding;	K12182	HGS; hepatocyte growth factor-regulated tyrosine kinase substrate	hsa04144 Endocytosis - Homo sapiens (human); hsa04145 Phagosome - Homo sapiens (human);	IPR002014; IPR000306; IPR017455; IPR013083; IPR018205; IPR011011; IPR024641; IPR008942;	Zinc finger, FYVE-related; VHS subgroup; Zinc finger, FYVE/PHD-type; Hepatocyte growth factor-regulated tyrosine kinase substrate, helical domain; FYVE zinc finger; VHS; ENTH/VHS; Zinc finger, RING/FYVE/PHD-type;	SNARE complex; RIN1-STAM2-HRS complex;
O14974	299	S	Protein phosphatase 1 regulatory subunit 12A	PPP1R12A				1.006	1.03	0.992						.....KSP.....	EKRDKKSPLIEST	nucl	mitosis; positive regulation of biosynthetic process; single-organism process; cellular metabolic process; phosphate-containing compound metabolic process; regulation of RNA biosynthetic process; metabolic process; positive regulation of metabolic process; regulation of localization; positive regulation of nitrogen compound metabolic process; regulation of dephosphorylation; macromolecule metabol…	intracellular organelle; intracellular non-membrane-bounded organelle; cytoskeletal part; cytoplasm; intracellular organelle part; protein serine/threonine phosphatase complex; macromolecular complex; intracellular part; PTW/PP1 phosphatase complex; cell; organelle part; chromosomal part; non-membrane-bounded organelle; organelle; cytoskeleton; microtubule organizing center; microtubule cytoskele…	molecular transducer activity; enzyme regulator activity; phosphatase regulator activity; binding; 14-3-3 protein binding; protein binding; enzyme inhibitor activity; signal transducer activity;	K06270	PPP1R12A; protein phosphatase 1 regulatory subunit 12A	hsa04611 Platelet activation - Homo sapiens (human); hsa04921 Oxytocin signaling pathway - Homo sapiens (human); hsa04024 cAMP signaling pathway - Homo sapiens (human); hsa05205 Proteoglycans in cancer - Homo sapiens (human); hsa04510 Focal adhesion - Homo sapiens (human); hsa04022 cGMP-PKG signaling pathway - Homo sapiens (human); hsa04810 Regulation of actin cytoskeleton - Homo sapiens (human);…	IPR020683;	Ankyrin repeat-containing domain;	MRIP-MBS-RHOA complex; MRIP-MBS complex;
O14974	422	S	Protein phosphatase 1 regulatory subunit 12A	PPP1R12A			0.887	1.006	1.03	0.992			0.894153	0.894153		......SP....R	TTATKISPKEEER	nucl	mitosis; positive regulation of biosynthetic process; single-organism process; cellular metabolic process; phosphate-containing compound metabolic process; regulation of RNA biosynthetic process; metabolic process; positive regulation of metabolic process; regulation of localization; positive regulation of nitrogen compound metabolic process; regulation of dephosphorylation; macromolecule metabol…	intracellular organelle; intracellular non-membrane-bounded organelle; cytoskeletal part; cytoplasm; intracellular organelle part; protein serine/threonine phosphatase complex; macromolecular complex; intracellular part; PTW/PP1 phosphatase complex; cell; organelle part; chromosomal part; non-membrane-bounded organelle; organelle; cytoskeleton; microtubule organizing center; microtubule cytoskele…	molecular transducer activity; enzyme regulator activity; phosphatase regulator activity; binding; 14-3-3 protein binding; protein binding; enzyme inhibitor activity; signal transducer activity;	K06270	PPP1R12A; protein phosphatase 1 regulatory subunit 12A	hsa04611 Platelet activation - Homo sapiens (human); hsa04921 Oxytocin signaling pathway - Homo sapiens (human); hsa04024 cAMP signaling pathway - Homo sapiens (human); hsa05205 Proteoglycans in cancer - Homo sapiens (human); hsa04510 Focal adhesion - Homo sapiens (human); hsa04022 cGMP-PKG signaling pathway - Homo sapiens (human); hsa04810 Regulation of actin cytoskeleton - Homo sapiens (human);…	IPR020683;	Ankyrin repeat-containing domain;	MRIP-MBS-RHOA complex; MRIP-MBS complex;
O14974	443	T	Protein phosphatase 1 regulatory subunit 12A	PPP1R12A		1.533		1.006	1.03	0.992		1.48835		1.48835			RLGLRKTGSYGAL	nucl	mitosis; positive regulation of biosynthetic process; single-organism process; cellular metabolic process; phosphate-containing compound metabolic process; regulation of RNA biosynthetic process; metabolic process; positive regulation of metabolic process; regulation of localization; positive regulation of nitrogen compound metabolic process; regulation of dephosphorylation; macromolecule metabol…	intracellular organelle; intracellular non-membrane-bounded organelle; cytoskeletal part; cytoplasm; intracellular organelle part; protein serine/threonine phosphatase complex; macromolecular complex; intracellular part; PTW/PP1 phosphatase complex; cell; organelle part; chromosomal part; non-membrane-bounded organelle; organelle; cytoskeleton; microtubule organizing center; microtubule cytoskele…	molecular transducer activity; enzyme regulator activity; phosphatase regulator activity; binding; 14-3-3 protein binding; protein binding; enzyme inhibitor activity; signal transducer activity;	K06270	PPP1R12A; protein phosphatase 1 regulatory subunit 12A	hsa04611 Platelet activation - Homo sapiens (human); hsa04921 Oxytocin signaling pathway - Homo sapiens (human); hsa04024 cAMP signaling pathway - Homo sapiens (human); hsa05205 Proteoglycans in cancer - Homo sapiens (human); hsa04510 Focal adhesion - Homo sapiens (human); hsa04022 cGMP-PKG signaling pathway - Homo sapiens (human); hsa04810 Regulation of actin cytoskeleton - Homo sapiens (human);…	IPR020683;	Ankyrin repeat-containing domain;	MRIP-MBS-RHOA complex; MRIP-MBS complex;
O14974	445	S	Protein phosphatase 1 regulatory subunit 12A	PPP1R12A	1.506	1.502	1.51	1.006	1.03	0.992	1.49702	1.45825	1.52218	1.49248	0.0014566	.....GS......	GLRKTGSYGALAE	nucl	mitosis; positive regulation of biosynthetic process; single-organism process; cellular metabolic process; phosphate-containing compound metabolic process; regulation of RNA biosynthetic process; metabolic process; positive regulation of metabolic process; regulation of localization; positive regulation of nitrogen compound metabolic process; regulation of dephosphorylation; macromolecule metabol…	intracellular organelle; intracellular non-membrane-bounded organelle; cytoskeletal part; cytoplasm; intracellular organelle part; protein serine/threonine phosphatase complex; macromolecular complex; intracellular part; PTW/PP1 phosphatase complex; cell; organelle part; chromosomal part; non-membrane-bounded organelle; organelle; cytoskeleton; microtubule organizing center; microtubule cytoskele…	molecular transducer activity; enzyme regulator activity; phosphatase regulator activity; binding; 14-3-3 protein binding; protein binding; enzyme inhibitor activity; signal transducer activity;	K06270	PPP1R12A; protein phosphatase 1 regulatory subunit 12A	hsa04611 Platelet activation - Homo sapiens (human); hsa04921 Oxytocin signaling pathway - Homo sapiens (human); hsa04024 cAMP signaling pathway - Homo sapiens (human); hsa05205 Proteoglycans in cancer - Homo sapiens (human); hsa04510 Focal adhesion - Homo sapiens (human); hsa04022 cGMP-PKG signaling pathway - Homo sapiens (human); hsa04810 Regulation of actin cytoskeleton - Homo sapiens (human);…	IPR020683;	Ankyrin repeat-containing domain;	MRIP-MBS-RHOA complex; MRIP-MBS complex;
O14974	479	S	Protein phosphatase 1 regulatory subunit 12A	PPP1R12A		1.375	1.175	1.006	1.03	0.992		1.33495	1.18448	1.25971		......SL.....	SPRLSSSLDNKEK	nucl	mitosis; positive regulation of biosynthetic process; single-organism process; cellular metabolic process; phosphate-containing compound metabolic process; regulation of RNA biosynthetic process; metabolic process; positive regulation of metabolic process; regulation of localization; positive regulation of nitrogen compound metabolic process; regulation of dephosphorylation; macromolecule metabol…	intracellular organelle; intracellular non-membrane-bounded organelle; cytoskeletal part; cytoplasm; intracellular organelle part; protein serine/threonine phosphatase complex; macromolecular complex; intracellular part; PTW/PP1 phosphatase complex; cell; organelle part; chromosomal part; non-membrane-bounded organelle; organelle; cytoskeleton; microtubule organizing center; microtubule cytoskele…	molecular transducer activity; enzyme regulator activity; phosphatase regulator activity; binding; 14-3-3 protein binding; protein binding; enzyme inhibitor activity; signal transducer activity;	K06270	PPP1R12A; protein phosphatase 1 regulatory subunit 12A	hsa04611 Platelet activation - Homo sapiens (human); hsa04921 Oxytocin signaling pathway - Homo sapiens (human); hsa04024 cAMP signaling pathway - Homo sapiens (human); hsa05205 Proteoglycans in cancer - Homo sapiens (human); hsa04510 Focal adhesion - Homo sapiens (human); hsa04022 cGMP-PKG signaling pathway - Homo sapiens (human); hsa04810 Regulation of actin cytoskeleton - Homo sapiens (human);…	IPR020683;	Ankyrin repeat-containing domain;	MRIP-MBS-RHOA complex; MRIP-MBS complex;
O14974	507	S	Protein phosphatase 1 regulatory subunit 12A	PPP1R12A	3.06	3.206	3.247	1.006	1.03	0.992	3.04175	3.11262	3.27319	3.14252	0.000536324	...R..S......	IPRRLASTSDIEE	nucl	mitosis; positive regulation of biosynthetic process; single-organism process; cellular metabolic process; phosphate-containing compound metabolic process; regulation of RNA biosynthetic process; metabolic process; positive regulation of metabolic process; regulation of localization; positive regulation of nitrogen compound metabolic process; regulation of dephosphorylation; macromolecule metabol…	intracellular organelle; intracellular non-membrane-bounded organelle; cytoskeletal part; cytoplasm; intracellular organelle part; protein serine/threonine phosphatase complex; macromolecular complex; intracellular part; PTW/PP1 phosphatase complex; cell; organelle part; chromosomal part; non-membrane-bounded organelle; organelle; cytoskeleton; microtubule organizing center; microtubule cytoskele…	molecular transducer activity; enzyme regulator activity; phosphatase regulator activity; binding; 14-3-3 protein binding; protein binding; enzyme inhibitor activity; signal transducer activity;	K06270	PPP1R12A; protein phosphatase 1 regulatory subunit 12A	hsa04611 Platelet activation - Homo sapiens (human); hsa04921 Oxytocin signaling pathway - Homo sapiens (human); hsa04024 cAMP signaling pathway - Homo sapiens (human); hsa05205 Proteoglycans in cancer - Homo sapiens (human); hsa04510 Focal adhesion - Homo sapiens (human); hsa04022 cGMP-PKG signaling pathway - Homo sapiens (human); hsa04810 Regulation of actin cytoskeleton - Homo sapiens (human);…	IPR020683;	Ankyrin repeat-containing domain;	MRIP-MBS-RHOA complex; MRIP-MBS complex;
O14974	668	S	Protein phosphatase 1 regulatory subunit 12A	PPP1R12A				1.006	1.03	0.992						...RR.S......	VRERRRSYLTPVR	nucl	mitosis; positive regulation of biosynthetic process; single-organism process; cellular metabolic process; phosphate-containing compound metabolic process; regulation of RNA biosynthetic process; metabolic process; positive regulation of metabolic process; regulation of localization; positive regulation of nitrogen compound metabolic process; regulation of dephosphorylation; macromolecule metabol…	intracellular organelle; intracellular non-membrane-bounded organelle; cytoskeletal part; cytoplasm; intracellular organelle part; protein serine/threonine phosphatase complex; macromolecular complex; intracellular part; PTW/PP1 phosphatase complex; cell; organelle part; chromosomal part; non-membrane-bounded organelle; organelle; cytoskeleton; microtubule organizing center; microtubule cytoskele…	molecular transducer activity; enzyme regulator activity; phosphatase regulator activity; binding; 14-3-3 protein binding; protein binding; enzyme inhibitor activity; signal transducer activity;	K06270	PPP1R12A; protein phosphatase 1 regulatory subunit 12A	hsa04611 Platelet activation - Homo sapiens (human); hsa04921 Oxytocin signaling pathway - Homo sapiens (human); hsa04024 cAMP signaling pathway - Homo sapiens (human); hsa05205 Proteoglycans in cancer - Homo sapiens (human); hsa04510 Focal adhesion - Homo sapiens (human); hsa04022 cGMP-PKG signaling pathway - Homo sapiens (human); hsa04810 Regulation of actin cytoskeleton - Homo sapiens (human);…	IPR020683;	Ankyrin repeat-containing domain;	MRIP-MBS-RHOA complex; MRIP-MBS complex;
O14974	696	T	Protein phosphatase 1 regulatory subunit 12A	PPP1R12A			4.09	1.006	1.03	0.992			4.12298	4.12298			RQSRRSTQGVTLT	nucl	mitosis; positive regulation of biosynthetic process; single-organism process; cellular metabolic process; phosphate-containing compound metabolic process; regulation of RNA biosynthetic process; metabolic process; positive regulation of metabolic process; regulation of localization; positive regulation of nitrogen compound metabolic process; regulation of dephosphorylation; macromolecule metabol…	intracellular organelle; intracellular non-membrane-bounded organelle; cytoskeletal part; cytoplasm; intracellular organelle part; protein serine/threonine phosphatase complex; macromolecular complex; intracellular part; PTW/PP1 phosphatase complex; cell; organelle part; chromosomal part; non-membrane-bounded organelle; organelle; cytoskeleton; microtubule organizing center; microtubule cytoskele…	molecular transducer activity; enzyme regulator activity; phosphatase regulator activity; binding; 14-3-3 protein binding; protein binding; enzyme inhibitor activity; signal transducer activity;	K06270	PPP1R12A; protein phosphatase 1 regulatory subunit 12A	hsa04611 Platelet activation - Homo sapiens (human); hsa04921 Oxytocin signaling pathway - Homo sapiens (human); hsa04024 cAMP signaling pathway - Homo sapiens (human); hsa05205 Proteoglycans in cancer - Homo sapiens (human); hsa04510 Focal adhesion - Homo sapiens (human); hsa04022 cGMP-PKG signaling pathway - Homo sapiens (human); hsa04810 Regulation of actin cytoskeleton - Homo sapiens (human);…	IPR020683;	Ankyrin repeat-containing domain;	MRIP-MBS-RHOA complex; MRIP-MBS complex;
O14974	871	S	Protein phosphatase 1 regulatory subunit 12A	PPP1R12A	0.776		0.715	1.006	1.03	0.992	0.771372		0.720766	0.746069		......SD.E...	NEQEQQSDTEEGS	nucl	mitosis; positive regulation of biosynthetic process; single-organism process; cellular metabolic process; phosphate-containing compound metabolic process; regulation of RNA biosynthetic process; metabolic process; positive regulation of metabolic process; regulation of localization; positive regulation of nitrogen compound metabolic process; regulation of dephosphorylation; macromolecule metabol…	intracellular organelle; intracellular non-membrane-bounded organelle; cytoskeletal part; cytoplasm; intracellular organelle part; protein serine/threonine phosphatase complex; macromolecular complex; intracellular part; PTW/PP1 phosphatase complex; cell; organelle part; chromosomal part; non-membrane-bounded organelle; organelle; cytoskeleton; microtubule organizing center; microtubule cytoskele…	molecular transducer activity; enzyme regulator activity; phosphatase regulator activity; binding; 14-3-3 protein binding; protein binding; enzyme inhibitor activity; signal transducer activity;	K06270	PPP1R12A; protein phosphatase 1 regulatory subunit 12A	hsa04611 Platelet activation - Homo sapiens (human); hsa04921 Oxytocin signaling pathway - Homo sapiens (human); hsa04024 cAMP signaling pathway - Homo sapiens (human); hsa05205 Proteoglycans in cancer - Homo sapiens (human); hsa04510 Focal adhesion - Homo sapiens (human); hsa04022 cGMP-PKG signaling pathway - Homo sapiens (human); hsa04810 Regulation of actin cytoskeleton - Homo sapiens (human);…	IPR020683;	Ankyrin repeat-containing domain;	MRIP-MBS-RHOA complex; MRIP-MBS complex;
O14974	903	S	Protein phosphatase 1 regulatory subunit 12A	PPP1R12A	1.067	0.973	0.844	1.006	1.03	0.992	1.06064	0.94466	0.850806	0.952034	0.565395	...R..SL.....	AGDRYDSLLGRSG	nucl	mitosis; positive regulation of biosynthetic process; single-organism process; cellular metabolic process; phosphate-containing compound metabolic process; regulation of RNA biosynthetic process; metabolic process; positive regulation of metabolic process; regulation of localization; positive regulation of nitrogen compound metabolic process; regulation of dephosphorylation; macromolecule metabol…	intracellular organelle; intracellular non-membrane-bounded organelle; cytoskeletal part; cytoplasm; intracellular organelle part; protein serine/threonine phosphatase complex; macromolecular complex; intracellular part; PTW/PP1 phosphatase complex; cell; organelle part; chromosomal part; non-membrane-bounded organelle; organelle; cytoskeleton; microtubule organizing center; microtubule cytoskele…	molecular transducer activity; enzyme regulator activity; phosphatase regulator activity; binding; 14-3-3 protein binding; protein binding; enzyme inhibitor activity; signal transducer activity;	K06270	PPP1R12A; protein phosphatase 1 regulatory subunit 12A	hsa04611 Platelet activation - Homo sapiens (human); hsa04921 Oxytocin signaling pathway - Homo sapiens (human); hsa04024 cAMP signaling pathway - Homo sapiens (human); hsa05205 Proteoglycans in cancer - Homo sapiens (human); hsa04510 Focal adhesion - Homo sapiens (human); hsa04022 cGMP-PKG signaling pathway - Homo sapiens (human); hsa04810 Regulation of actin cytoskeleton - Homo sapiens (human);…	IPR020683;	Ankyrin repeat-containing domain;	MRIP-MBS-RHOA complex; MRIP-MBS complex;
O14974	908	S	Protein phosphatase 1 regulatory subunit 12A	PPP1R12A				1.006	1.03	0.992							DSLLGRSGSYSYL	nucl	mitosis; positive regulation of biosynthetic process; single-organism process; cellular metabolic process; phosphate-containing compound metabolic process; regulation of RNA biosynthetic process; metabolic process; positive regulation of metabolic process; regulation of localization; positive regulation of nitrogen compound metabolic process; regulation of dephosphorylation; macromolecule metabol…	intracellular organelle; intracellular non-membrane-bounded organelle; cytoskeletal part; cytoplasm; intracellular organelle part; protein serine/threonine phosphatase complex; macromolecular complex; intracellular part; PTW/PP1 phosphatase complex; cell; organelle part; chromosomal part; non-membrane-bounded organelle; organelle; cytoskeleton; microtubule organizing center; microtubule cytoskele…	molecular transducer activity; enzyme regulator activity; phosphatase regulator activity; binding; 14-3-3 protein binding; protein binding; enzyme inhibitor activity; signal transducer activity;	K06270	PPP1R12A; protein phosphatase 1 regulatory subunit 12A	hsa04611 Platelet activation - Homo sapiens (human); hsa04921 Oxytocin signaling pathway - Homo sapiens (human); hsa04024 cAMP signaling pathway - Homo sapiens (human); hsa05205 Proteoglycans in cancer - Homo sapiens (human); hsa04510 Focal adhesion - Homo sapiens (human); hsa04022 cGMP-PKG signaling pathway - Homo sapiens (human); hsa04810 Regulation of actin cytoskeleton - Homo sapiens (human);…	IPR020683;	Ankyrin repeat-containing domain;	MRIP-MBS-RHOA complex; MRIP-MBS complex;
O14974	910	S	Protein phosphatase 1 regulatory subunit 12A	PPP1R12A	1.378	1.3	1.453	1.006	1.03	0.992	1.36978	1.26214	1.46472	1.36554	0.0277711	...RS.S......	LLGRSGSYSYLEE	nucl	mitosis; positive regulation of biosynthetic process; single-organism process; cellular metabolic process; phosphate-containing compound metabolic process; regulation of RNA biosynthetic process; metabolic process; positive regulation of metabolic process; regulation of localization; positive regulation of nitrogen compound metabolic process; regulation of dephosphorylation; macromolecule metabol…	intracellular organelle; intracellular non-membrane-bounded organelle; cytoskeletal part; cytoplasm; intracellular organelle part; protein serine/threonine phosphatase complex; macromolecular complex; intracellular part; PTW/PP1 phosphatase complex; cell; organelle part; chromosomal part; non-membrane-bounded organelle; organelle; cytoskeleton; microtubule organizing center; microtubule cytoskele…	molecular transducer activity; enzyme regulator activity; phosphatase regulator activity; binding; 14-3-3 protein binding; protein binding; enzyme inhibitor activity; signal transducer activity;	K06270	PPP1R12A; protein phosphatase 1 regulatory subunit 12A	hsa04611 Platelet activation - Homo sapiens (human); hsa04921 Oxytocin signaling pathway - Homo sapiens (human); hsa04024 cAMP signaling pathway - Homo sapiens (human); hsa05205 Proteoglycans in cancer - Homo sapiens (human); hsa04510 Focal adhesion - Homo sapiens (human); hsa04022 cGMP-PKG signaling pathway - Homo sapiens (human); hsa04810 Regulation of actin cytoskeleton - Homo sapiens (human);…	IPR020683;	Ankyrin repeat-containing domain;	MRIP-MBS-RHOA complex; MRIP-MBS complex;
O14974	995	S	Protein phosphatase 1 regulatory subunit 12A	PPP1R12A	0.516	0.542	0.524	1.006	1.03	0.992	0.512922	0.526214	0.528226	0.522454	0.000302946	...RR.S......	ALERRISEMEEEL	nucl	mitosis; positive regulation of biosynthetic process; single-organism process; cellular metabolic process; phosphate-containing compound metabolic process; regulation of RNA biosynthetic process; metabolic process; positive regulation of metabolic process; regulation of localization; positive regulation of nitrogen compound metabolic process; regulation of dephosphorylation; macromolecule metabol…	intracellular organelle; intracellular non-membrane-bounded organelle; cytoskeletal part; cytoplasm; intracellular organelle part; protein serine/threonine phosphatase complex; macromolecular complex; intracellular part; PTW/PP1 phosphatase complex; cell; organelle part; chromosomal part; non-membrane-bounded organelle; organelle; cytoskeleton; microtubule organizing center; microtubule cytoskele…	molecular transducer activity; enzyme regulator activity; phosphatase regulator activity; binding; 14-3-3 protein binding; protein binding; enzyme inhibitor activity; signal transducer activity;	K06270	PPP1R12A; protein phosphatase 1 regulatory subunit 12A	hsa04611 Platelet activation - Homo sapiens (human); hsa04921 Oxytocin signaling pathway - Homo sapiens (human); hsa04024 cAMP signaling pathway - Homo sapiens (human); hsa05205 Proteoglycans in cancer - Homo sapiens (human); hsa04510 Focal adhesion - Homo sapiens (human); hsa04022 cGMP-PKG signaling pathway - Homo sapiens (human); hsa04810 Regulation of actin cytoskeleton - Homo sapiens (human);…	IPR020683;	Ankyrin repeat-containing domain;	MRIP-MBS-RHOA complex; MRIP-MBS complex;
O14975	577	T	Very long-chain acyl-CoA synthetase	SLC27A2				1.034	1.033	0.885							FKHRKMTLVEEGF	E.R.	organic acid biosynthetic process; single-organism process; cellular lipid metabolic process; biosynthetic process; cellular metabolic process; establishment of localization; lipid biosynthetic process; metabolic process; monocarboxylic acid transport; lipid modification; monocarboxylic acid metabolic process; macromolecule localization; bile acid metabolic process; single-organism transport; lip…	membrane; nuclear outer membrane-endoplasmic reticulum membrane network; endoplasmic reticulum; organelle membrane; cytoplasm; microbody part; intrinsic to membrane; intracellular part; cell; organelle part; peroxisomal membrane; membrane-enclosed lumen; integral to organelle membrane; intracellular organelle lumen; membrane part; cell part; intracellular; microbody; intrinsic to endoplasmic reti…	nucleoside phosphate binding; ligase activity; lipid transporter activity; substrate-specific transporter activity; ligase activity, forming carbon-sulfur bonds; pristanate-CoA ligase activity; organic cyclic compound binding; heterocyclic compound binding; catalytic activity; ribonucleotide binding; binding; purine ribonucleoside binding; fatty acid transporter activity; fatty acid ligase activi…	K08746	SLC27A2; solute carrier family 27 (fatty acid transporter), member 2 [EC:6.2.1.- 6.2.1.3]	hsa03320 PPAR signaling pathway - Homo sapiens (human); hsa04146 Peroxisome - Homo sapiens (human);	IPR025110; IPR000873;	AMP-dependent synthetase/ligase; AMP-binding enzyme C-terminal domain;
O14978	178	S	Zinc finger protein 263	ZNF263												......SP.R...	QELLGPSPQRDPQ	nucl	biosynthetic process; multi-organism cellular process; cellular metabolic process; negative regulation of RNA metabolic process; regulation of RNA biosynthetic process; metabolic process; macromolecule metabolic process; negative regulation of macromolecule biosynthetic process; interspecies interaction between organisms; regulation of gene expression; heterocycle biosynthetic process; regulation…	intracellular membrane-bounded organelle; organelle; cytoskeleton; intracellular organelle; nucleus; microtubule cytoskeleton; intracellular non-membrane-bounded organelle; cell part; intracellular; cytoplasm; intracellular part; membrane-bounded organelle; cell; non-membrane-bounded organelle;	organic cyclic compound binding; heterocyclic compound binding; DNA binding; transition metal ion binding; binding; ion binding; nucleic acid binding transcription factor activity; nucleic acid binding; cation binding; metal ion binding; zinc ion binding; sequence-specific DNA binding transcription factor activity;	K09229			IPR015880; IPR008916; IPR007087; IPR001909; IPR013087; IPR003309;	Zinc finger, C2H2-like; Krueppel-associated box; Transcription regulator SCAN; Zinc finger C2H2-type/integrase DNA-binding domain; Zinc finger, C2H2; Retrovirus capsid, C-terminal;
O14979	241	S	Heterogeneous nuclear ribonucleoprotein D-like	HNRNPDL	0.673	0.645		1.014	0.999	1.034	0.663708	0.645646		0.654677		...G..SP.....	VFVGGLSPDTSEE	nucl	regulation of cellular process; cellular aromatic compound metabolic process; regulation of macromolecule metabolic process; regulation of nucleobase-containing compound metabolic process; biosynthetic process; cellular metabolic process; organic substance metabolic process; regulation of RNA biosynthetic process; metabolic process; heterocycle metabolic process; aromatic compound biosynthetic pr…	organelle; intracellular membrane-bounded organelle; intracellular organelle; nucleus; cell part; intracellular; intracellular organelle part; cytoplasm; macromolecular complex; intracellular part; spliceosomal complex; ribonucleoprotein complex; membrane-bounded organelle; cell; organelle part; nuclear part;	poly(A) RNA binding; RNA binding; DNA binding; nucleoside phosphate binding; double-stranded DNA binding; single-stranded DNA binding; poly-purine tract binding; nucleotide binding; single-stranded RNA binding; heterocyclic compound binding; organic cyclic compound binding; mRNA binding; binding; nucleic acid binding; structure-specific DNA binding; poly(G) RNA binding; small molecule binding;	K13044			IPR000504; IPR012677;	Nucleotide-binding, alpha-beta plait; RNA recognition motif domain;	Large Drosha complex;
O14980	391	S	Exportin-1	XPO1	1.632	1.703	1.557	1.001	0.991	1.002	1.63037	1.71847	1.55389	1.63424	0.0052312	......SP.....	PFSTSASPLLSGS	cyto	single organism signaling; RNA transport; regulation of biological quality; cell surface receptor signaling pathway; nuclear transport; regulation of cell cycle process; cellular metabolic process; protein transport; metabolic process; transmembrane receptor protein serine/threonine kinase signaling pathway; regulation of localization; regulation of centrosome duplication; nucleobase-containing c…	membrane; nuclear outer membrane-endoplasmic reticulum membrane network; cytoplasm; intrinsic to membrane; macromolecular complex; intracellular part; nuclear body; cell; organelle part; Cajal body; non-membrane-bounded organelle; chromosomal part; membrane-enclosed lumen; nucleoplasm; intracellular organelle lumen; annulate lamellae; intracellular; cell part; membrane part; chromosome; membrane-…	organic cyclic compound binding; heterocyclic compound binding; RNA binding; protein transporter activity; binding; nucleic acid binding; substrate-specific transporter activity; transporter activity;	K14290	XPO1; exportin-1	hsa05166 HTLV-I infection - Homo sapiens (human); hsa03008 Ribosome biogenesis in eukaryotes - Homo sapiens (human); hsa05169 Epstein-Barr virus infection - Homo sapiens (human); hsa03013 RNA transport - Homo sapiens (human); hsa05164 Influenza A - Homo sapiens (human);	IPR001494; IPR014877; IPR013598; IPR011989; IPR016024;	Importin-beta, N-terminal domain; Armadillo-type fold; Exportin-1/Importin-beta-like; Armadillo-like helical; CRM1 C-terminal domain;	Snurportin-CRM1-RanGTP complex; CRM1-RAN-PHAX-CBC complex; CRM1-Survivin mitotic complex; CRM1-Survivin-AuroraB mitotic complex;
O14980	1031	S	Exportin-1	XPO1	0.541	0.631	0.738	1.001	0.991	1.002	0.54046	0.636731	0.736527	0.637906	0.0527848	......SD.....	FAGEDTSDLFLEE	cyto	single organism signaling; RNA transport; regulation of biological quality; cell surface receptor signaling pathway; nuclear transport; regulation of cell cycle process; cellular metabolic process; protein transport; metabolic process; transmembrane receptor protein serine/threonine kinase signaling pathway; regulation of localization; regulation of centrosome duplication; nucleobase-containing c…	membrane; nuclear outer membrane-endoplasmic reticulum membrane network; cytoplasm; intrinsic to membrane; macromolecular complex; intracellular part; nuclear body; cell; organelle part; Cajal body; non-membrane-bounded organelle; chromosomal part; membrane-enclosed lumen; nucleoplasm; intracellular organelle lumen; annulate lamellae; intracellular; cell part; membrane part; chromosome; membrane-…	organic cyclic compound binding; heterocyclic compound binding; RNA binding; protein transporter activity; binding; nucleic acid binding; substrate-specific transporter activity; transporter activity;	K14290	XPO1; exportin-1	hsa05166 HTLV-I infection - Homo sapiens (human); hsa03008 Ribosome biogenesis in eukaryotes - Homo sapiens (human); hsa05169 Epstein-Barr virus infection - Homo sapiens (human); hsa03013 RNA transport - Homo sapiens (human); hsa05164 Influenza A - Homo sapiens (human);	IPR001494; IPR014877; IPR013598; IPR011989; IPR016024;	Importin-beta, N-terminal domain; Armadillo-type fold; Exportin-1/Importin-beta-like; Armadillo-like helical; CRM1 C-terminal domain;	Snurportin-CRM1-RanGTP complex; CRM1-RAN-PHAX-CBC complex; CRM1-Survivin mitotic complex; CRM1-Survivin-AuroraB mitotic complex;
O14980	1055	S	Exportin-1	XPO1				1.001	0.991	1.002						...R..S......	KHKRQMSVPGIFN	cyto	single organism signaling; RNA transport; regulation of biological quality; cell surface receptor signaling pathway; nuclear transport; regulation of cell cycle process; cellular metabolic process; protein transport; metabolic process; transmembrane receptor protein serine/threonine kinase signaling pathway; regulation of localization; regulation of centrosome duplication; nucleobase-containing c…	membrane; nuclear outer membrane-endoplasmic reticulum membrane network; cytoplasm; intrinsic to membrane; macromolecular complex; intracellular part; nuclear body; cell; organelle part; Cajal body; non-membrane-bounded organelle; chromosomal part; membrane-enclosed lumen; nucleoplasm; intracellular organelle lumen; annulate lamellae; intracellular; cell part; membrane part; chromosome; membrane-…	organic cyclic compound binding; heterocyclic compound binding; RNA binding; protein transporter activity; binding; nucleic acid binding; substrate-specific transporter activity; transporter activity;	K14290	XPO1; exportin-1	hsa05166 HTLV-I infection - Homo sapiens (human); hsa03008 Ribosome biogenesis in eukaryotes - Homo sapiens (human); hsa05169 Epstein-Barr virus infection - Homo sapiens (human); hsa03013 RNA transport - Homo sapiens (human); hsa05164 Influenza A - Homo sapiens (human);	IPR001494; IPR014877; IPR013598; IPR011989; IPR016024;	Importin-beta, N-terminal domain; Armadillo-type fold; Exportin-1/Importin-beta-like; Armadillo-like helical; CRM1 C-terminal domain;	Snurportin-CRM1-RanGTP complex; CRM1-RAN-PHAX-CBC complex; CRM1-Survivin mitotic complex; CRM1-Survivin-AuroraB mitotic complex;
O15013	379	S	Rho guanine nucleotide exchange factor 10	ARHGEF10	1.268	1.309	1.312	1.019	0.99	1	1.24436	1.32222	1.312	1.29286	0.0081899	...RT.S......	SFIRTKSLIAQDH	nucl	cellular component biogenesis; single organism signaling; regulation of biological quality; centrosome cycle; ensheathment of neurons; mitosis; regulation of signaling; positive regulation of cellular catabolic process; cellular developmental process; Schwann cell differentiation; regulation of nucleotide catabolic process; neurogenesis; single-organism process; neurological system process; Schwa…	intracellular organelle; intracellular non-membrane-bounded organelle; cytoskeletal part; cytoplasm; intracellular organelle part; intracellular part; cytosol; cell; organelle part; non-membrane-bounded organelle; organelle; cytoskeleton; microtubule organizing center; microtubule cytoskeleton; centrosome; cell part; intracellular; cytoplasmic part;	enzyme regulator activity; guanyl-nucleotide exchange factor activity; nucleoside-triphosphatase regulator activity; GTPase regulator activity; Ras guanyl-nucleotide exchange factor activity; small GTPase regulator activity; Rho guanyl-nucleotide exchange factor activity;	K16727			IPR017986; IPR015943; IPR000219;	Dbl homology (DH) domain; WD40/YVTN repeat-like-containing domain; WD40-repeat-containing domain;
O15013	1284	S	Rho guanine nucleotide exchange factor 10	ARHGEF10	1.13	0.938	0.999	1.019	0.99	1	1.10893	0.947475	0.999	1.01847	0.802308		KSDLSSSSGSLSL	nucl	cellular component biogenesis; single organism signaling; regulation of biological quality; centrosome cycle; ensheathment of neurons; mitosis; regulation of signaling; positive regulation of cellular catabolic process; cellular developmental process; Schwann cell differentiation; regulation of nucleotide catabolic process; neurogenesis; single-organism process; neurological system process; Schwa…	intracellular organelle; intracellular non-membrane-bounded organelle; cytoskeletal part; cytoplasm; intracellular organelle part; intracellular part; cytosol; cell; organelle part; non-membrane-bounded organelle; organelle; cytoskeleton; microtubule organizing center; microtubule cytoskeleton; centrosome; cell part; intracellular; cytoplasmic part;	enzyme regulator activity; guanyl-nucleotide exchange factor activity; nucleoside-triphosphatase regulator activity; GTPase regulator activity; Ras guanyl-nucleotide exchange factor activity; small GTPase regulator activity; Rho guanyl-nucleotide exchange factor activity;	K16727			IPR017986; IPR015943; IPR000219;	Dbl homology (DH) domain; WD40/YVTN repeat-like-containing domain; WD40-repeat-containing domain;
O15013	1285	S	Rho guanine nucleotide exchange factor 10	ARHGEF10	0.957			1.019	0.99	1	0.939156			0.939156			SDLSSSSGSLSLS	nucl	cellular component biogenesis; single organism signaling; regulation of biological quality; centrosome cycle; ensheathment of neurons; mitosis; regulation of signaling; positive regulation of cellular catabolic process; cellular developmental process; Schwann cell differentiation; regulation of nucleotide catabolic process; neurogenesis; single-organism process; neurological system process; Schwa…	intracellular organelle; intracellular non-membrane-bounded organelle; cytoskeletal part; cytoplasm; intracellular organelle part; intracellular part; cytosol; cell; organelle part; non-membrane-bounded organelle; organelle; cytoskeleton; microtubule organizing center; microtubule cytoskeleton; centrosome; cell part; intracellular; cytoplasmic part;	enzyme regulator activity; guanyl-nucleotide exchange factor activity; nucleoside-triphosphatase regulator activity; GTPase regulator activity; Ras guanyl-nucleotide exchange factor activity; small GTPase regulator activity; Rho guanyl-nucleotide exchange factor activity;	K16727			IPR017986; IPR015943; IPR000219;	Dbl homology (DH) domain; WD40/YVTN repeat-like-containing domain; WD40-repeat-containing domain;
O15013	1291	S	Rho guanine nucleotide exchange factor 10	ARHGEF10	1.407	1.58	1.564	1.019	0.99	1	1.38077	1.59596	1.564	1.51358	0.0176066		SGSLSLSHGSSSL	nucl	cellular component biogenesis; single organism signaling; regulation of biological quality; centrosome cycle; ensheathment of neurons; mitosis; regulation of signaling; positive regulation of cellular catabolic process; cellular developmental process; Schwann cell differentiation; regulation of nucleotide catabolic process; neurogenesis; single-organism process; neurological system process; Schwa…	intracellular organelle; intracellular non-membrane-bounded organelle; cytoskeletal part; cytoplasm; intracellular organelle part; intracellular part; cytosol; cell; organelle part; non-membrane-bounded organelle; organelle; cytoskeleton; microtubule organizing center; microtubule cytoskeleton; centrosome; cell part; intracellular; cytoplasmic part;	enzyme regulator activity; guanyl-nucleotide exchange factor activity; nucleoside-triphosphatase regulator activity; GTPase regulator activity; Ras guanyl-nucleotide exchange factor activity; small GTPase regulator activity; Rho guanyl-nucleotide exchange factor activity;	K16727			IPR017986; IPR015943; IPR000219;	Dbl homology (DH) domain; WD40/YVTN repeat-like-containing domain; WD40-repeat-containing domain;
O15014	358	S	Zinc finger protein 609	ZNF609		1.146	1.291	0.98								......SP.....	PPRFCDSPTSDLE	nucl		organelle; intracellular membrane-bounded organelle; intracellular organelle; nucleus; cell part; intracellular; intracellular part; membrane-bounded organelle; cell;	cation binding; metal ion binding; zinc ion binding; transition metal ion binding; binding; ion binding;				IPR015880; IPR007087;	Zinc finger, C2H2-like; Zinc finger, C2H2;
O15014	413	S	Zinc finger protein 609	ZNF609			1.361	0.98								...RR.S......	SKGRRGSQNSSEH	nucl		organelle; intracellular membrane-bounded organelle; intracellular organelle; nucleus; cell part; intracellular; intracellular part; membrane-bounded organelle; cell;	cation binding; metal ion binding; zinc ion binding; transition metal ion binding; binding; ion binding;				IPR015880; IPR007087;	Zinc finger, C2H2-like; Zinc finger, C2H2;
O15014	467	S	Zinc finger protein 609	ZNF609	1.514	1.49	1.486	0.98			1.5449			1.5449		.R.R..S......	KRVRTNSMGSATG	nucl		organelle; intracellular membrane-bounded organelle; intracellular organelle; nucleus; cell part; intracellular; intracellular part; membrane-bounded organelle; cell;	cation binding; metal ion binding; zinc ion binding; transition metal ion binding; binding; ion binding;				IPR015880; IPR007087;	Zinc finger, C2H2-like; Zinc finger, C2H2;
O15014	491	S	Zinc finger protein 609	ZNF609	1.483	1.34		0.98			1.51327			1.51327		......SP.....	LDRNCPSPVLIDC	nucl		organelle; intracellular membrane-bounded organelle; intracellular organelle; nucleus; cell part; intracellular; intracellular part; membrane-bounded organelle; cell;	cation binding; metal ion binding; zinc ion binding; transition metal ion binding; binding; ion binding;				IPR015880; IPR007087;	Zinc finger, C2H2-like; Zinc finger, C2H2;
O15014	576	S	Zinc finger protein 609	ZNF609	1.42	1.429	1.428	0.98			1.44898			1.44898		....P.SP.....	RLVEPHSPSPSSK	nucl		organelle; intracellular membrane-bounded organelle; intracellular organelle; nucleus; cell part; intracellular; intracellular part; membrane-bounded organelle; cell;	cation binding; metal ion binding; zinc ion binding; transition metal ion binding; binding; ion binding;				IPR015880; IPR007087;	Zinc finger, C2H2-like; Zinc finger, C2H2;
O15014	578	S	Zinc finger protein 609	ZNF609	1.384	1.195	1.359	0.98			1.41224			1.41224		......SP..K..	VEPHSPSPSSKFS	nucl		organelle; intracellular membrane-bounded organelle; intracellular organelle; nucleus; cell part; intracellular; intracellular part; membrane-bounded organelle; cell;	cation binding; metal ion binding; zinc ion binding; transition metal ion binding; binding; ion binding;				IPR015880; IPR007087;	Zinc finger, C2H2-like; Zinc finger, C2H2;
O15014	722	T	Zinc finger protein 609	ZNF609	2.039		2.384	0.98			2.08061			2.08061		......TP.K...	TVNPALTPAKDKK	nucl		organelle; intracellular membrane-bounded organelle; intracellular organelle; nucleus; cell part; intracellular; intracellular part; membrane-bounded organelle; cell;	cation binding; metal ion binding; zinc ion binding; transition metal ion binding; binding; ion binding;				IPR015880; IPR007087;	Zinc finger, C2H2-like; Zinc finger, C2H2;
O15014	746	T	Zinc finger protein 609	ZNF609	1.437	1.433	1.378	0.98			1.46633			1.46633		......TP.K...	ELESPLTPGKVCR	nucl		organelle; intracellular membrane-bounded organelle; intracellular organelle; nucleus; cell part; intracellular; intracellular part; membrane-bounded organelle; cell;	cation binding; metal ion binding; zinc ion binding; transition metal ion binding; binding; ion binding;				IPR015880; IPR007087;	Zinc finger, C2H2-like; Zinc finger, C2H2;
O15014	758	S	Zinc finger protein 609	ZNF609	1.09	1.16	1.08	0.98			1.11224			1.11224		......SP.R...	RAEEGKSPFRESS	nucl		organelle; intracellular membrane-bounded organelle; intracellular organelle; nucleus; cell part; intracellular; intracellular part; membrane-bounded organelle; cell;	cation binding; metal ion binding; zinc ion binding; transition metal ion binding; binding; ion binding;				IPR015880; IPR007087;	Zinc finger, C2H2-like; Zinc finger, C2H2;
O15014	804	S	Zinc finger protein 609	ZNF609			1.911	0.98								......SP.....	FTDNAPSPSIGGS	nucl		organelle; intracellular membrane-bounded organelle; intracellular organelle; nucleus; cell part; intracellular; intracellular part; membrane-bounded organelle; cell;	cation binding; metal ion binding; zinc ion binding; transition metal ion binding; binding; ion binding;				IPR015880; IPR007087;	Zinc finger, C2H2-like; Zinc finger, C2H2;
O15014	1055	S	Zinc finger protein 609	ZNF609	1.87	1.572	1.659	0.98			1.90816			1.90816		......SL.....	TLTKAPSLTDLVK	nucl		organelle; intracellular membrane-bounded organelle; intracellular organelle; nucleus; cell part; intracellular; intracellular part; membrane-bounded organelle; cell;	cation binding; metal ion binding; zinc ion binding; transition metal ion binding; binding; ion binding;				IPR015880; IPR007087;	Zinc finger, C2H2-like; Zinc finger, C2H2;
O15015	612	S	Zinc finger protein 646	ZNF646												......SP.R...	RTETTMSPPRAFA	nucl	regulation of cellular process; cellular aromatic compound metabolic process; regulation of macromolecule metabolic process; regulation of nucleobase-containing compound metabolic process; biosynthetic process; cellular metabolic process; organic substance metabolic process; regulation of RNA biosynthetic process; metabolic process; heterocycle metabolic process; nucleobase-containing compound me…	organelle; intracellular membrane-bounded organelle; intracellular organelle; nucleus; cell part; intracellular; intracellular part; membrane-bounded organelle; cell;	organic cyclic compound binding; heterocyclic compound binding; DNA binding; transition metal ion binding; binding; ion binding; nucleic acid binding; metal ion binding; cation binding; zinc ion binding;				IPR015880; IPR007087; IPR013087;	Zinc finger, C2H2-like; Zinc finger C2H2-type/integrase DNA-binding domain; Zinc finger, C2H2;
O15020	834	Y	Spectrin beta chain, non-erythrocytic 2	SPTBN2	1.245	1.409	1.343	1.092	1.081	1.109	1.14011	1.30342	1.211	1.21818	0.0538955		#N/A	cyto	cellular component biogenesis; regulation of actin filament polymerization; regulation of biological quality; negative regulation of actin filament depolymerization; brain development; cellular developmental process; neuron development; negative regulation of cellular component organization; cellular component morphogenesis; neurogenesis; single-organism process; regulation of actin filament leng…	intracellular organelle; cell cortex; intracellular non-membrane-bounded organelle; cytoskeletal part; cell periphery; intracellular organelle part; cytoplasm; cortical cytoskeleton; neuronal cell body; cortical actin cytoskeleton; intracellular part; cytosol; cell; actin cytoskeleton; organelle part; non-membrane-bounded organelle; cytoskeleton; organelle; cell cortex part; intracellular; cell p…	cytoskeletal protein binding; structural constituent of cytoskeleton; binding; phospholipid binding; ion binding; actin binding; lipid binding; protein binding; anion binding; structural molecule activity;	K06115			IPR001605; IPR011993; IPR001715; IPR001849;	Pleckstrin homology domain, spectrin-type; Pleckstrin homology-like domain; Pleckstrin homology domain; Calponin homology domain;
O15020	2171	S	Spectrin beta chain, non-erythrocytic 2	SPTBN2			1.907	1.092	1.081	1.109			1.71957	1.71957		.....GS......	EGPGPGSGDEANG	cyto	cellular component biogenesis; regulation of actin filament polymerization; regulation of biological quality; negative regulation of actin filament depolymerization; brain development; cellular developmental process; neuron development; negative regulation of cellular component organization; cellular component morphogenesis; neurogenesis; single-organism process; regulation of actin filament leng…	intracellular organelle; cell cortex; intracellular non-membrane-bounded organelle; cytoskeletal part; cell periphery; intracellular organelle part; cytoplasm; cortical cytoskeleton; neuronal cell body; cortical actin cytoskeleton; intracellular part; cytosol; cell; actin cytoskeleton; organelle part; non-membrane-bounded organelle; cytoskeleton; organelle; cell cortex part; intracellular; cell p…	cytoskeletal protein binding; structural constituent of cytoskeleton; binding; phospholipid binding; ion binding; actin binding; lipid binding; protein binding; anion binding; structural molecule activity;	K06115			IPR001605; IPR011993; IPR001715; IPR001849;	Pleckstrin homology domain, spectrin-type; Pleckstrin homology-like domain; Pleckstrin homology domain; Calponin homology domain;
O15020	2359	S	Spectrin beta chain, non-erythrocytic 2	SPTBN2	3.796			1.092	1.081	1.109	3.47619			3.47619		....P.SP.....	MTMPPVSPVGAEG	cyto	cellular component biogenesis; regulation of actin filament polymerization; regulation of biological quality; negative regulation of actin filament depolymerization; brain development; cellular developmental process; neuron development; negative regulation of cellular component organization; cellular component morphogenesis; neurogenesis; single-organism process; regulation of actin filament leng…	intracellular organelle; cell cortex; intracellular non-membrane-bounded organelle; cytoskeletal part; cell periphery; intracellular organelle part; cytoplasm; cortical cytoskeleton; neuronal cell body; cortical actin cytoskeleton; intracellular part; cytosol; cell; actin cytoskeleton; organelle part; non-membrane-bounded organelle; cytoskeleton; organelle; cell cortex part; intracellular; cell p…	cytoskeletal protein binding; structural constituent of cytoskeleton; binding; phospholipid binding; ion binding; actin binding; lipid binding; protein binding; anion binding; structural molecule activity;	K06115			IPR001605; IPR011993; IPR001715; IPR001849;	Pleckstrin homology domain, spectrin-type; Pleckstrin homology-like domain; Pleckstrin homology domain; Calponin homology domain;
O15021	206	S	Microtubule-associated serine/threonine-protein kinase 4	MAST4	2.296		2.404										SQALGQSAPSLTA	cyto		intracellular part; cell; cell part; intracellular; cytoplasm;	magnesium ion binding; ATP binding; nucleoside phosphate binding; phosphotransferase activity, alcohol group as acceptor; nucleoside binding; ion binding; protein kinase activity; nucleotide binding; organic cyclic compound binding; heterocyclic compound binding; ribonucleoside binding; kinase activity; catalytic activity; ribonucleotide binding; binding; purine ribonucleoside binding; cation bin…	K08789			IPR015022; IPR000719; IPR002290; IPR001478; IPR023142; IPR011009; IPR000961;	Microtubule-associated serine/threonine-protein kinase, pre-PK domain; Protein kinase domain; Microtubule-associated serine/threonine-protein kinase, domain; Protein kinase-like domain; AGC-kinase, C-terminal; PDZ domain; Serine/threonine- /dual specificity protein kinase, catalytic domain;
O15021	1373	S	Microtubule-associated serine/threonine-protein kinase 4	MAST4												...RR.S......	RSGRRKSAGNIPL	cyto		intracellular part; cell; cell part; intracellular; cytoplasm;	magnesium ion binding; ATP binding; nucleoside phosphate binding; phosphotransferase activity, alcohol group as acceptor; nucleoside binding; ion binding; protein kinase activity; nucleotide binding; organic cyclic compound binding; heterocyclic compound binding; ribonucleoside binding; kinase activity; catalytic activity; ribonucleotide binding; binding; purine ribonucleoside binding; cation bin…	K08789			IPR015022; IPR000719; IPR002290; IPR001478; IPR023142; IPR011009; IPR000961;	Microtubule-associated serine/threonine-protein kinase, pre-PK domain; Protein kinase domain; Microtubule-associated serine/threonine-protein kinase, domain; Protein kinase-like domain; AGC-kinase, C-terminal; PDZ domain; Serine/threonine- /dual specificity protein kinase, catalytic domain;
O15021	2523	S	Microtubule-associated serine/threonine-protein kinase 4	MAST4		2.06	1.625									......SL.....	HMTKSDSLPSFRV	cyto		intracellular part; cell; cell part; intracellular; cytoplasm;	magnesium ion binding; ATP binding; nucleoside phosphate binding; phosphotransferase activity, alcohol group as acceptor; nucleoside binding; ion binding; protein kinase activity; nucleotide binding; organic cyclic compound binding; heterocyclic compound binding; ribonucleoside binding; kinase activity; catalytic activity; ribonucleotide binding; binding; purine ribonucleoside binding; cation bin…	K08789			IPR015022; IPR000719; IPR002290; IPR001478; IPR023142; IPR011009; IPR000961;	Microtubule-associated serine/threonine-protein kinase, pre-PK domain; Protein kinase domain; Microtubule-associated serine/threonine-protein kinase, domain; Protein kinase-like domain; AGC-kinase, C-terminal; PDZ domain; Serine/threonine- /dual specificity protein kinase, catalytic domain;
O15027	136	S	Protein transport protein Sec16A	SEC16A	1.19	1.26	1.04	1.052	1.05	1	1.13118	1.2	1.04	1.12373	0.152264	......SP.....	IVNHWASPELRQN	nucl	cellular component biogenesis; organelle localization; cellular component organization; vesicle coating; intracellular transport; vesicle targeting, rough ER to cis-Golgi; COPII vesicle coating; single-organism process; Golgi vesicle transport; vesicle targeting; protein transport; establishment of localization; establishment of localization in cell; cellular component assembly; macromolecular co…	membrane; intracellular organelle; endoplasmic reticulum; nuclear outer membrane-endoplasmic reticulum membrane network; organelle membrane; intracellular organelle part; cytoplasm; Golgi membrane; endomembrane system; intracellular part; cytosol; cell; organelle part; organelle; intracellular membrane-bounded organelle; endoplasmic reticulum part; membrane part; intracellular; cell part; Golgi a…					IPR024340;	Sec16, central conserved domain;	TNF-alpha/NF-kappa B signaling complex;
O15027	391	S	Protein transport protein Sec16A	SEC16A	0.849	0.922	0.902	1.052	1.05	1	0.807034	0.878095	0.902	0.862376	0.0680741	......SP.....	FKQIDSSPVGGET	nucl	cellular component biogenesis; organelle localization; cellular component organization; vesicle coating; intracellular transport; vesicle targeting, rough ER to cis-Golgi; COPII vesicle coating; single-organism process; Golgi vesicle transport; vesicle targeting; protein transport; establishment of localization; establishment of localization in cell; cellular component assembly; macromolecular co…	membrane; intracellular organelle; endoplasmic reticulum; nuclear outer membrane-endoplasmic reticulum membrane network; organelle membrane; intracellular organelle part; cytoplasm; Golgi membrane; endomembrane system; intracellular part; cytosol; cell; organelle part; organelle; intracellular membrane-bounded organelle; endoplasmic reticulum part; membrane part; intracellular; cell part; Golgi a…					IPR024340;	Sec16, central conserved domain;	TNF-alpha/NF-kappa B signaling complex;
O15027	417	S	Protein transport protein Sec16A	SEC16A				1.052	1.05	1						......SP.K...	SQPSTPSPPKPTG	nucl	cellular component biogenesis; organelle localization; cellular component organization; vesicle coating; intracellular transport; vesicle targeting, rough ER to cis-Golgi; COPII vesicle coating; single-organism process; Golgi vesicle transport; vesicle targeting; protein transport; establishment of localization; establishment of localization in cell; cellular component assembly; macromolecular co…	membrane; intracellular organelle; endoplasmic reticulum; nuclear outer membrane-endoplasmic reticulum membrane network; organelle membrane; intracellular organelle part; cytoplasm; Golgi membrane; endomembrane system; intracellular part; cytosol; cell; organelle part; organelle; intracellular membrane-bounded organelle; endoplasmic reticulum part; membrane part; intracellular; cell part; Golgi a…					IPR024340;	Sec16, central conserved domain;	TNF-alpha/NF-kappa B signaling complex;
O15027	891	S	Protein transport protein Sec16A	SEC16A	1.323	1.363	1.373	1.052	1.05	1	1.2576	1.2981	1.373	1.30957	0.0133796	......SP....K	PPQQQASPPQLPK	nucl	cellular component biogenesis; organelle localization; cellular component organization; vesicle coating; intracellular transport; vesicle targeting, rough ER to cis-Golgi; COPII vesicle coating; single-organism process; Golgi vesicle transport; vesicle targeting; protein transport; establishment of localization; establishment of localization in cell; cellular component assembly; macromolecular co…	membrane; intracellular organelle; endoplasmic reticulum; nuclear outer membrane-endoplasmic reticulum membrane network; organelle membrane; intracellular organelle part; cytoplasm; Golgi membrane; endomembrane system; intracellular part; cytosol; cell; organelle part; organelle; intracellular membrane-bounded organelle; endoplasmic reticulum part; membrane part; intracellular; cell part; Golgi a…					IPR024340;	Sec16, central conserved domain;	TNF-alpha/NF-kappa B signaling complex;
O15027	1127	S	Protein transport protein Sec16A	SEC16A		0.76	0.788	1.052	1.05	1		0.72381	0.788	0.755905		...R..S......	AYRREHSAFGDRP	nucl	cellular component biogenesis; organelle localization; cellular component organization; vesicle coating; intracellular transport; vesicle targeting, rough ER to cis-Golgi; COPII vesicle coating; single-organism process; Golgi vesicle transport; vesicle targeting; protein transport; establishment of localization; establishment of localization in cell; cellular component assembly; macromolecular co…	membrane; intracellular organelle; endoplasmic reticulum; nuclear outer membrane-endoplasmic reticulum membrane network; organelle membrane; intracellular organelle part; cytoplasm; Golgi membrane; endomembrane system; intracellular part; cytosol; cell; organelle part; organelle; intracellular membrane-bounded organelle; endoplasmic reticulum part; membrane part; intracellular; cell part; Golgi a…					IPR024340;	Sec16, central conserved domain;	TNF-alpha/NF-kappa B signaling complex;
O15027	1147	T	Protein transport protein Sec16A	SEC16A	1.418			1.052	1.05	1	1.34791			1.34791			RYDPRFTGSFDDD	nucl	cellular component biogenesis; organelle localization; cellular component organization; vesicle coating; intracellular transport; vesicle targeting, rough ER to cis-Golgi; COPII vesicle coating; single-organism process; Golgi vesicle transport; vesicle targeting; protein transport; establishment of localization; establishment of localization in cell; cellular component assembly; macromolecular co…	membrane; intracellular organelle; endoplasmic reticulum; nuclear outer membrane-endoplasmic reticulum membrane network; organelle membrane; intracellular organelle part; cytoplasm; Golgi membrane; endomembrane system; intracellular part; cytosol; cell; organelle part; organelle; intracellular membrane-bounded organelle; endoplasmic reticulum part; membrane part; intracellular; cell part; Golgi a…					IPR024340;	Sec16, central conserved domain;	TNF-alpha/NF-kappa B signaling complex;
O15027	1149	S	Protein transport protein Sec16A	SEC16A	1.45	1.393	1.388	1.052	1.05	1	1.37833	1.32667	1.388	1.36433	0.0030557	.....GS......	DPRFTGSFDDDPD	nucl	cellular component biogenesis; organelle localization; cellular component organization; vesicle coating; intracellular transport; vesicle targeting, rough ER to cis-Golgi; COPII vesicle coating; single-organism process; Golgi vesicle transport; vesicle targeting; protein transport; establishment of localization; establishment of localization in cell; cellular component assembly; macromolecular co…	membrane; intracellular organelle; endoplasmic reticulum; nuclear outer membrane-endoplasmic reticulum membrane network; organelle membrane; intracellular organelle part; cytoplasm; Golgi membrane; endomembrane system; intracellular part; cytosol; cell; organelle part; organelle; intracellular membrane-bounded organelle; endoplasmic reticulum part; membrane part; intracellular; cell part; Golgi a…					IPR024340;	Sec16, central conserved domain;	TNF-alpha/NF-kappa B signaling complex;
O15027	1178	S	Protein transport protein Sec16A	SEC16A	0.853	0.877	0.868	1.052	1.05	1	0.810837	0.835238	0.868	0.838025	0.0180972	......SL.....	SEHSARSLHSAHS	nucl	cellular component biogenesis; organelle localization; cellular component organization; vesicle coating; intracellular transport; vesicle targeting, rough ER to cis-Golgi; COPII vesicle coating; single-organism process; Golgi vesicle transport; vesicle targeting; protein transport; establishment of localization; establishment of localization in cell; cellular component assembly; macromolecular co…	membrane; intracellular organelle; endoplasmic reticulum; nuclear outer membrane-endoplasmic reticulum membrane network; organelle membrane; intracellular organelle part; cytoplasm; Golgi membrane; endomembrane system; intracellular part; cytosol; cell; organelle part; organelle; intracellular membrane-bounded organelle; endoplasmic reticulum part; membrane part; intracellular; cell part; Golgi a…					IPR024340;	Sec16, central conserved domain;	TNF-alpha/NF-kappa B signaling complex;
O15027	1181	S	Protein transport protein Sec16A	SEC16A		0.847		1.052	1.05	1		0.806667		0.806667			SARSLHSAHSLAS	nucl	cellular component biogenesis; organelle localization; cellular component organization; vesicle coating; intracellular transport; vesicle targeting, rough ER to cis-Golgi; COPII vesicle coating; single-organism process; Golgi vesicle transport; vesicle targeting; protein transport; establishment of localization; establishment of localization in cell; cellular component assembly; macromolecular co…	membrane; intracellular organelle; endoplasmic reticulum; nuclear outer membrane-endoplasmic reticulum membrane network; organelle membrane; intracellular organelle part; cytoplasm; Golgi membrane; endomembrane system; intracellular part; cytosol; cell; organelle part; organelle; intracellular membrane-bounded organelle; endoplasmic reticulum part; membrane part; intracellular; cell part; Golgi a…					IPR024340;	Sec16, central conserved domain;	TNF-alpha/NF-kappa B signaling complex;
O15027	1190	S	Protein transport protein Sec16A	SEC16A			1.345	1.052	1.05	1			1.345	1.345		....R.S......	SLASRRSSLSSHS	nucl	cellular component biogenesis; organelle localization; cellular component organization; vesicle coating; intracellular transport; vesicle targeting, rough ER to cis-Golgi; COPII vesicle coating; single-organism process; Golgi vesicle transport; vesicle targeting; protein transport; establishment of localization; establishment of localization in cell; cellular component assembly; macromolecular co…	membrane; intracellular organelle; endoplasmic reticulum; nuclear outer membrane-endoplasmic reticulum membrane network; organelle membrane; intracellular organelle part; cytoplasm; Golgi membrane; endomembrane system; intracellular part; cytosol; cell; organelle part; organelle; intracellular membrane-bounded organelle; endoplasmic reticulum part; membrane part; intracellular; cell part; Golgi a…					IPR024340;	Sec16, central conserved domain;	TNF-alpha/NF-kappa B signaling complex;
O15027	1191	S	Protein transport protein Sec16A	SEC16A	1.247	1.284	1.246	1.052	1.05	1	1.18536	1.22286	1.246	1.21807	0.00807825	...RR.S......	LASRRSSLSSHSH	nucl	cellular component biogenesis; organelle localization; cellular component organization; vesicle coating; intracellular transport; vesicle targeting, rough ER to cis-Golgi; COPII vesicle coating; single-organism process; Golgi vesicle transport; vesicle targeting; protein transport; establishment of localization; establishment of localization in cell; cellular component assembly; macromolecular co…	membrane; intracellular organelle; endoplasmic reticulum; nuclear outer membrane-endoplasmic reticulum membrane network; organelle membrane; intracellular organelle part; cytoplasm; Golgi membrane; endomembrane system; intracellular part; cytosol; cell; organelle part; organelle; intracellular membrane-bounded organelle; endoplasmic reticulum part; membrane part; intracellular; cell part; Golgi a…					IPR024340;	Sec16, central conserved domain;	TNF-alpha/NF-kappa B signaling complex;
O15027	1202	Y	Protein transport protein Sec16A	SEC16A	0.214	0.244	0.206	1.052	1.05	1	0.203422	0.232381	0.206	0.213934	0.00113057		#N/A	nucl	cellular component biogenesis; organelle localization; cellular component organization; vesicle coating; intracellular transport; vesicle targeting, rough ER to cis-Golgi; COPII vesicle coating; single-organism process; Golgi vesicle transport; vesicle targeting; protein transport; establishment of localization; establishment of localization in cell; cellular component assembly; macromolecular co…	membrane; intracellular organelle; endoplasmic reticulum; nuclear outer membrane-endoplasmic reticulum membrane network; organelle membrane; intracellular organelle part; cytoplasm; Golgi membrane; endomembrane system; intracellular part; cytosol; cell; organelle part; organelle; intracellular membrane-bounded organelle; endoplasmic reticulum part; membrane part; intracellular; cell part; Golgi a…					IPR024340;	Sec16, central conserved domain;	TNF-alpha/NF-kappa B signaling complex;
O15027	1220	S	Protein transport protein Sec16A	SEC16A	1.272			1.052	1.05	1	1.20913			1.20913		.....GS......	APLPPGSFHGDFA	nucl	cellular component biogenesis; organelle localization; cellular component organization; vesicle coating; intracellular transport; vesicle targeting, rough ER to cis-Golgi; COPII vesicle coating; single-organism process; Golgi vesicle transport; vesicle targeting; protein transport; establishment of localization; establishment of localization in cell; cellular component assembly; macromolecular co…	membrane; intracellular organelle; endoplasmic reticulum; nuclear outer membrane-endoplasmic reticulum membrane network; organelle membrane; intracellular organelle part; cytoplasm; Golgi membrane; endomembrane system; intracellular part; cytosol; cell; organelle part; organelle; intracellular membrane-bounded organelle; endoplasmic reticulum part; membrane part; intracellular; cell part; Golgi a…					IPR024340;	Sec16, central conserved domain;	TNF-alpha/NF-kappa B signaling complex;
O15027	1258	S	Protein transport protein Sec16A	SEC16A			1.326	1.052	1.05	1			1.326	1.326			PAMEQVSSRPTSP	nucl	cellular component biogenesis; organelle localization; cellular component organization; vesicle coating; intracellular transport; vesicle targeting, rough ER to cis-Golgi; COPII vesicle coating; single-organism process; Golgi vesicle transport; vesicle targeting; protein transport; establishment of localization; establishment of localization in cell; cellular component assembly; macromolecular co…	membrane; intracellular organelle; endoplasmic reticulum; nuclear outer membrane-endoplasmic reticulum membrane network; organelle membrane; intracellular organelle part; cytoplasm; Golgi membrane; endomembrane system; intracellular part; cytosol; cell; organelle part; organelle; intracellular membrane-bounded organelle; endoplasmic reticulum part; membrane part; intracellular; cell part; Golgi a…					IPR024340;	Sec16, central conserved domain;	TNF-alpha/NF-kappa B signaling complex;
O15027	1786	S	Protein transport protein Sec16A	SEC16A	3.961	3.583	4.172	1.052	1.05	1	3.76521	3.41238	4.172	3.7832	0.00285472	......SP.R...	PDGPLASPARVPM	nucl	cellular component biogenesis; organelle localization; cellular component organization; vesicle coating; intracellular transport; vesicle targeting, rough ER to cis-Golgi; COPII vesicle coating; single-organism process; Golgi vesicle transport; vesicle targeting; protein transport; establishment of localization; establishment of localization in cell; cellular component assembly; macromolecular co…	membrane; intracellular organelle; endoplasmic reticulum; nuclear outer membrane-endoplasmic reticulum membrane network; organelle membrane; intracellular organelle part; cytoplasm; Golgi membrane; endomembrane system; intracellular part; cytosol; cell; organelle part; organelle; intracellular membrane-bounded organelle; endoplasmic reticulum part; membrane part; intracellular; cell part; Golgi a…					IPR024340;	Sec16, central conserved domain;	TNF-alpha/NF-kappa B signaling complex;
O15027	1844	S	Protein transport protein Sec16A	SEC16A				1.052	1.05	1						......SP.....	LLQEARSPDPGIV	nucl	cellular component biogenesis; organelle localization; cellular component organization; vesicle coating; intracellular transport; vesicle targeting, rough ER to cis-Golgi; COPII vesicle coating; single-organism process; Golgi vesicle transport; vesicle targeting; protein transport; establishment of localization; establishment of localization in cell; cellular component assembly; macromolecular co…	membrane; intracellular organelle; endoplasmic reticulum; nuclear outer membrane-endoplasmic reticulum membrane network; organelle membrane; intracellular organelle part; cytoplasm; Golgi membrane; endomembrane system; intracellular part; cytosol; cell; organelle part; organelle; intracellular membrane-bounded organelle; endoplasmic reticulum part; membrane part; intracellular; cell part; Golgi a…					IPR024340;	Sec16, central conserved domain;	TNF-alpha/NF-kappa B signaling complex;
O15027	1876	T	Protein transport protein Sec16A	SEC16A	2.205	2.247		1.052	1.05	1	2.09601	2.14		2.118		......TP.....	GKFANLTPSRTVP	nucl	cellular component biogenesis; organelle localization; cellular component organization; vesicle coating; intracellular transport; vesicle targeting, rough ER to cis-Golgi; COPII vesicle coating; single-organism process; Golgi vesicle transport; vesicle targeting; protein transport; establishment of localization; establishment of localization in cell; cellular component assembly; macromolecular co…	membrane; intracellular organelle; endoplasmic reticulum; nuclear outer membrane-endoplasmic reticulum membrane network; organelle membrane; intracellular organelle part; cytoplasm; Golgi membrane; endomembrane system; intracellular part; cytosol; cell; organelle part; organelle; intracellular membrane-bounded organelle; endoplasmic reticulum part; membrane part; intracellular; cell part; Golgi a…					IPR024340;	Sec16, central conserved domain;	TNF-alpha/NF-kappa B signaling complex;
O15027	1905	S	Protein transport protein Sec16A	SEC16A	2.21	2.009	2.097	1.052	1.05	1	2.10076	1.91333	2.097	2.03703	0.00281681	......SP....K	QPPLSLSPAPETK	nucl	cellular component biogenesis; organelle localization; cellular component organization; vesicle coating; intracellular transport; vesicle targeting, rough ER to cis-Golgi; COPII vesicle coating; single-organism process; Golgi vesicle transport; vesicle targeting; protein transport; establishment of localization; establishment of localization in cell; cellular component assembly; macromolecular co…	membrane; intracellular organelle; endoplasmic reticulum; nuclear outer membrane-endoplasmic reticulum membrane network; organelle membrane; intracellular organelle part; cytoplasm; Golgi membrane; endomembrane system; intracellular part; cytosol; cell; organelle part; organelle; intracellular membrane-bounded organelle; endoplasmic reticulum part; membrane part; intracellular; cell part; Golgi a…					IPR024340;	Sec16, central conserved domain;	TNF-alpha/NF-kappa B signaling complex;
O15031	1244	S	Plexin-B2	PLXNB2	1.044	1.121	1.109	1.09	1.032	1.083	0.957798	1.08624	1.02401	1.02268	0.682115		LEGLEESVRDRCK	plas	neural tube formation; regulation of biological quality; tube formation; chordate embryonic development; brain development; regulation of signaling; cellular developmental process; regulation of nucleotide catabolic process; neurogenesis; single-organism process; positive regulation of cellular component organization; neural precursor cell proliferation; tissue morphogenesis; regulation of cell c…	membrane; intrinsic to plasma membrane; plasma membrane part; intracellular; membrane part; cell part; cell periphery; intrinsic to membrane; integral to plasma membrane; cell; integral to membrane; plasma membrane;	signaling receptor activity; molecular transducer activity; receptor activity; enzyme regulator activity; nucleoside-triphosphatase regulator activity; GTPase regulator activity; semaphorin receptor activity; transmembrane signaling receptor activity; signal transducer activity; enzyme activator activity; GTPase activator activity;	K06821	PLXNB; plexin B	hsa04360 Axon guidance - Homo sapiens (human);	IPR013548; IPR001936; IPR013783; IPR014756; IPR015943; IPR002909; IPR008936; IPR001627;	WD40/YVTN repeat-like-containing domain; Rho GTPase activation protein; Ras GTPase-activating protein; Immunoglobulin-like fold; Immunoglobulin E-set; Plexin, cytoplasmic RasGAP domain; Sema domain; IPT domain;
O15037	10	S	Protein KHNYN	KHNYN	1.327	1.232	1.273			1.354			0.940177	0.940177		....P.SP.....	WGARPASPDRFAV	nucl							IPR021869; IPR004088;	Ribonuclease Zc3h12a-like; K Homology domain, type 1;
O15037	342	S	Protein KHNYN	KHNYN	1.426	1.897	1.448			1.354			1.06942	1.06942		...R..SL.....	AQSRGASLLQRLH	nucl							IPR021869; IPR004088;	Ribonuclease Zc3h12a-like; K Homology domain, type 1;
O15037	359	S	Protein KHNYN	KHNYN			2.327			1.354			1.71861	1.71861		...R..SP.....	SPPRVPSPPPAPE	nucl							IPR021869; IPR004088;	Ribonuclease Zc3h12a-like; K Homology domain, type 1;
O15042	67	S	U2 snRNP-associated SURP motif-containing protein	U2SURP	2.066	1.994	1.861	1.037	1.114	1.041	1.99229	1.78995	1.7877	1.85665	0.00503498	......SP.....	RESLCDSPHQNLS	nucl	RNA processing; cellular aromatic compound metabolic process; organic cyclic compound metabolic process; nitrogen compound metabolic process; primary metabolic process; cellular metabolic process; organic substance metabolic process; RNA metabolic process; metabolic process; nucleic acid metabolic process; heterocycle metabolic process; nucleobase-containing compound metabolic process; cellular m…	organelle; intracellular membrane-bounded organelle; intracellular organelle; nucleus; cell part; intracellular; intracellular part; membrane-bounded organelle; cell;	organic cyclic compound binding; heterocyclic compound binding; RNA binding; nucleoside phosphate binding; binding; nucleic acid binding; nucleotide binding; small molecule binding;	K12842	SR140; U2-associated protein SR140	hsa03040 Spliceosome - Homo sapiens (human);	IPR000061; IPR000504; IPR006569; IPR012677; IPR013170; IPR008942;	SWAP/Surp; Nucleotide-binding, alpha-beta plait; mRNA splicing factor, Cwf21; RNA recognition motif domain; ENTH/VHS; CID domain;	17S U2 snRNP; Spliceosome;
O15042	202	S	U2 snRNP-associated SURP motif-containing protein	U2SURP				1.037	1.114	1.041						...K..S......	EKEKKKSNLELFK	nucl	RNA processing; cellular aromatic compound metabolic process; organic cyclic compound metabolic process; nitrogen compound metabolic process; primary metabolic process; cellular metabolic process; organic substance metabolic process; RNA metabolic process; metabolic process; nucleic acid metabolic process; heterocycle metabolic process; nucleobase-containing compound metabolic process; cellular m…	organelle; intracellular membrane-bounded organelle; intracellular organelle; nucleus; cell part; intracellular; intracellular part; membrane-bounded organelle; cell;	organic cyclic compound binding; heterocyclic compound binding; RNA binding; nucleoside phosphate binding; binding; nucleic acid binding; nucleotide binding; small molecule binding;	K12842	SR140; U2-associated protein SR140	hsa03040 Spliceosome - Homo sapiens (human);	IPR000061; IPR000504; IPR006569; IPR012677; IPR013170; IPR008942;	SWAP/Surp; Nucleotide-binding, alpha-beta plait; mRNA splicing factor, Cwf21; RNA recognition motif domain; ENTH/VHS; CID domain;	17S U2 snRNP; Spliceosome;
O15042	485	S	U2 snRNP-associated SURP motif-containing protein	U2SURP	1.154	1.196	1.261	1.037	1.114	1.041	1.11283	1.07361	1.21134	1.13259	0.106655	......SP.K...	SILQGDSPTKWRT	nucl	RNA processing; cellular aromatic compound metabolic process; organic cyclic compound metabolic process; nitrogen compound metabolic process; primary metabolic process; cellular metabolic process; organic substance metabolic process; RNA metabolic process; metabolic process; nucleic acid metabolic process; heterocycle metabolic process; nucleobase-containing compound metabolic process; cellular m…	organelle; intracellular membrane-bounded organelle; intracellular organelle; nucleus; cell part; intracellular; intracellular part; membrane-bounded organelle; cell;	organic cyclic compound binding; heterocyclic compound binding; RNA binding; nucleoside phosphate binding; binding; nucleic acid binding; nucleotide binding; small molecule binding;	K12842	SR140; U2-associated protein SR140	hsa03040 Spliceosome - Homo sapiens (human);	IPR000061; IPR000504; IPR006569; IPR012677; IPR013170; IPR008942;	SWAP/Surp; Nucleotide-binding, alpha-beta plait; mRNA splicing factor, Cwf21; RNA recognition motif domain; ENTH/VHS; CID domain;	17S U2 snRNP; Spliceosome;
O15056	1124	S	Synaptojanin-2	SYNJ2		1.242	1.241	1.228	1.202	1.065		1.03328	1.16526	1.09927		...K..S......	MVKKSASDASISS	plas	phosphorylation; glycerolipid metabolic process; phosphatidylinositol biosynthetic process; small molecule metabolic process; phosphatidylinositol phosphorylation; phospholipid biosynthetic process; biosynthetic process; cellular lipid metabolic process; primary metabolic process; organic substance biosynthetic process; cellular metabolic process; lipid phosphorylation; phosphate-containing compo…	membrane; cell part; intracellular; cytoplasm; intracellular part; cytosol; cell; cytoplasmic part;	RNA binding; nucleoside phosphate binding; phosphatase activity; phosphatidylinositol phosphate phosphatase activity; hydrolase activity; nucleotide binding; phosphatidylinositol phosphate 5-phosphatase activity; heterocyclic compound binding; organic cyclic compound binding; phosphoric ester hydrolase activity; catalytic activity; binding; nucleic acid binding; hydrolase activity, acting on este…	K01099	E3.1.3.36; phosphatidylinositol-bisphosphatase [EC:3.1.3.36]	hsa00562 Inositol phosphate metabolism - Homo sapiens (human); hsa01100 Metabolic pathways - Homo sapiens (human); hsa04070 Phosphatidylinositol signaling system - Homo sapiens (human);	IPR000300; IPR000504; IPR012677; IPR005135; IPR002013; IPR015047;	Synaptojanin, N-terminal; Domain of unknown function DUF1866; Nucleotide-binding, alpha-beta plait; Endonuclease/exonuclease/phosphatase; RNA recognition motif domain; Inositol polyphosphate-related phosphatase;
O15061	429	S	Synemin	SYNM	1.203	1.24	1.253	1.339	1.385	1.366	0.898432	0.895307	0.917277	0.903672	0.0082595	...R..SP.....	TNVRTFSPTYGLL	nucl	cellular component organization; intermediate filament cytoskeleton organization; organelle organization; intermediate filament-based process; single-organism cellular process; single-organism process; cytoskeleton organization; cellular process; cellular component organization or biogenesis;	membrane; intracellular organelle; intracellular non-membrane-bounded organelle; cytoskeletal part; cell junction; myofibril; intracellular organelle part; cytoplasm; anchoring junction; macromolecular complex; intracellular part; cell; neurofilament cytoskeleton; organelle part; non-membrane-bounded organelle; cytoskeleton; organelle; intermediate filament cytoskeleton; costamere; intracellular;…	cytoskeletal protein binding; structural constituent of cytoskeleton; intermediate filament binding; vinculin binding; binding; protein binding; structural molecule activity; structural constituent of muscle; protein complex binding;	K10376
O15061	598	T	Synemin	SYNM			1.481	1.339	1.385	1.366			1.08419	1.08419		......TP.K...	SPKGLQTPVKDAG	nucl	cellular component organization; intermediate filament cytoskeleton organization; organelle organization; intermediate filament-based process; single-organism cellular process; single-organism process; cytoskeleton organization; cellular process; cellular component organization or biogenesis;	membrane; intracellular organelle; intracellular non-membrane-bounded organelle; cytoskeletal part; cell junction; myofibril; intracellular organelle part; cytoplasm; anchoring junction; macromolecular complex; intracellular part; cell; neurofilament cytoskeleton; organelle part; non-membrane-bounded organelle; cytoskeleton; organelle; intermediate filament cytoskeleton; costamere; intracellular;…	cytoskeletal protein binding; structural constituent of cytoskeleton; intermediate filament binding; vinculin binding; binding; protein binding; structural molecule activity; structural constituent of muscle; protein complex binding;	K10376
O15061	653	S	Synemin	SYNM			1.233	1.339	1.385	1.366			0.902635	0.902635		......SP.....	LKQFTQSPETEAS	nucl	cellular component organization; intermediate filament cytoskeleton organization; organelle organization; intermediate filament-based process; single-organism cellular process; single-organism process; cytoskeleton organization; cellular process; cellular component organization or biogenesis;	membrane; intracellular organelle; intracellular non-membrane-bounded organelle; cytoskeletal part; cell junction; myofibril; intracellular organelle part; cytoplasm; anchoring junction; macromolecular complex; intracellular part; cell; neurofilament cytoskeleton; organelle part; non-membrane-bounded organelle; cytoskeleton; organelle; intermediate filament cytoskeleton; costamere; intracellular;…	cytoskeletal protein binding; structural constituent of cytoskeleton; intermediate filament binding; vinculin binding; binding; protein binding; structural molecule activity; structural constituent of muscle; protein complex binding;	K10376
O15061	936	S	Synemin	SYNM	2.756		3.98	1.339	1.385	1.366	2.05825		2.91362	2.48593			PHEFHTSMKGISS	nucl	cellular component organization; intermediate filament cytoskeleton organization; organelle organization; intermediate filament-based process; single-organism cellular process; single-organism process; cytoskeleton organization; cellular process; cellular component organization or biogenesis;	membrane; intracellular organelle; intracellular non-membrane-bounded organelle; cytoskeletal part; cell junction; myofibril; intracellular organelle part; cytoplasm; anchoring junction; macromolecular complex; intracellular part; cell; neurofilament cytoskeleton; organelle part; non-membrane-bounded organelle; cytoskeleton; organelle; intermediate filament cytoskeleton; costamere; intracellular;…	cytoskeletal protein binding; structural constituent of cytoskeleton; intermediate filament binding; vinculin binding; binding; protein binding; structural molecule activity; structural constituent of muscle; protein complex binding;	K10376
O15061	1049	S	Synemin	SYNM	1.24	1.372	1.302	1.339	1.385	1.366	0.926064	0.990614	0.953148	0.956609	0.202149	....P.SP.....	RSPAPGSPDEEGG	nucl	cellular component organization; intermediate filament cytoskeleton organization; organelle organization; intermediate filament-based process; single-organism cellular process; single-organism process; cytoskeleton organization; cellular process; cellular component organization or biogenesis;	membrane; intracellular organelle; intracellular non-membrane-bounded organelle; cytoskeletal part; cell junction; myofibril; intracellular organelle part; cytoplasm; anchoring junction; macromolecular complex; intracellular part; cell; neurofilament cytoskeleton; organelle part; non-membrane-bounded organelle; cytoskeleton; organelle; intermediate filament cytoskeleton; costamere; intracellular;…	cytoskeletal protein binding; structural constituent of cytoskeleton; intermediate filament binding; vinculin binding; binding; protein binding; structural molecule activity; structural constituent of muscle; protein complex binding;	K10376
O15061	1181	S	Synemin	SYNM	2.076		1.771	1.339	1.385	1.366	1.55041		1.29649	1.42345		......SP.....	TLGPGQSPLSREV	nucl	cellular component organization; intermediate filament cytoskeleton organization; organelle organization; intermediate filament-based process; single-organism cellular process; single-organism process; cytoskeleton organization; cellular process; cellular component organization or biogenesis;	membrane; intracellular organelle; intracellular non-membrane-bounded organelle; cytoskeletal part; cell junction; myofibril; intracellular organelle part; cytoplasm; anchoring junction; macromolecular complex; intracellular part; cell; neurofilament cytoskeleton; organelle part; non-membrane-bounded organelle; cytoskeleton; organelle; intermediate filament cytoskeleton; costamere; intracellular;…	cytoskeletal protein binding; structural constituent of cytoskeleton; intermediate filament binding; vinculin binding; binding; protein binding; structural molecule activity; structural constituent of muscle; protein complex binding;	K10376
O15062	234	S	Zinc finger and BTB domain-containing protein 5	ZBTB5												......SP...K.	SREEFFSPDSLKI	nucl	regulation of cellular process; cellular aromatic compound metabolic process; regulation of macromolecule metabolic process; regulation of nucleobase-containing compound metabolic process; biosynthetic process; cellular metabolic process; organic substance metabolic process; regulation of RNA biosynthetic process; metabolic process; heterocycle metabolic process; nucleobase-containing compound me…	organelle; intracellular membrane-bounded organelle; intracellular organelle; nucleus; cell part; intracellular; intracellular part; membrane-bounded organelle; cell;	organic cyclic compound binding; heterocyclic compound binding; DNA binding; transition metal ion binding; binding; ion binding; nucleic acid binding; metal ion binding; cation binding; zinc ion binding;	K10492			IPR015880; IPR013069; IPR011333; IPR007087; IPR000210; IPR013087;	Zinc finger, C2H2-like; BTB/POZ; BTB/POZ fold; Zinc finger C2H2-type/integrase DNA-binding domain; Zinc finger, C2H2; BTB/POZ-like;
O15067	569	S	Phosphoribosylformylglycinamidine synthase	PFAS	0.855	0.819	0.825	0.955	0.968	0.973	0.895288	0.846074	0.847893	0.863085	0.0227638	......SP.R...	NALLLRSPNRDFL	nucl	purine ribonucleoside monophosphate metabolic process; nucleotide metabolic process; biosynthetic process; ribonucleoside monophosphate biosynthetic process; cellular metabolic process; IMP metabolic process; phosphate-containing compound metabolic process; ribose phosphate biosynthetic process; metabolic process; cellular amino acid metabolic process; carbohydrate derivative biosynthetic process…	cell part; intracellular; cytoplasm; intracellular part; cytosol; cell; cytoplasmic part;	phosphoribosylformylglycinamidine synthase activity; ATP binding; nucleoside phosphate binding; ligase activity; nucleoside binding; ion binding; nucleotide binding; carbon-nitrogen ligase activity, with glutamine as amido-N-donor; ligase activity, forming carbon-nitrogen bonds; organic cyclic compound binding; heterocyclic compound binding; ribonucleoside binding; catalytic activity; ribonucleot…	K01952	purL; phosphoribosylformylglycinamidine synthase [EC:6.3.5.3]	hsa00230 Purine metabolism - Homo sapiens (human); hsa01100 Metabolic pathways - Homo sapiens (human);	IPR016188; IPR000728; IPR010918; IPR017926;	AIR synthase related protein, N-terminal domain; Glutamine amidotransferase; PurM, N-terminal-like; AIR synthase-related protein, C-terminal domain;
O15084	1011	S	Serine/threonine-protein phosphatase 6 regulatory ankyrin repeat subunit A	ANKRD28	1.774	1.49	1.516	1.04	1.017	1.049	1.70577	1.46509	1.44519	1.53868	0.0223338	...K..S......	NTSKTVSFEALPI	cyto		intracellular organelle; intracellular organelle part; nuclear lumen; intracellular part; cell; organelle part; organelle; intracellular membrane-bounded organelle; membrane-enclosed lumen; nucleoplasm; nucleus; intracellular organelle lumen; cell part; intracellular; membrane-bounded organelle; organelle lumen; nuclear part;		K15502			IPR020683;	Ankyrin repeat-containing domain;	TNF-alpha/NF-kappa B signaling complex;
O15085	251	S	Rho guanine nucleotide exchange factor 11	ARHGEF11	1.551		1.182			1.184			0.998311	0.998311		...G..SP.....	SDPGLDSPRTSPV	nucl	single organism signaling; cell surface receptor signaling pathway; positive regulation of biosynthetic process; cellular component morphogenesis; regulation of cell growth; response to external stimulus; actin cytoskeleton organization; positive regulation of molecular function; response to growth factor stimulus; regulation of small GTPase mediated signal transduction; nervous system developmen…	membrane; cell part; intracellular; cytoplasm; intracellular part; cytosol; cell; cytoplasmic part;	guanyl-nucleotide exchange factor activity; receptor binding; nucleoside-triphosphatase regulator activity; ion binding; GTPase regulator activity; protein binding; enzyme regulator activity; binding; phospholipid binding; lipid binding; G-protein coupled receptor binding; anion binding; Ras guanyl-nucleotide exchange factor activity; small GTPase regulator activity; enzyme activator activity; Rh…	K12331	ARHGEF11; Rho guanine nucleotide exchange factor 11	hsa04270 Vascular smooth muscle contraction - Homo sapiens (human);	IPR016137; IPR011993; IPR015212; IPR001478; IPR000219; IPR001849;	Dbl homology (DH) domain; Pleckstrin homology-like domain; Pleckstrin homology domain; Regulator of G protein signalling superfamily; PDZ domain; Regulator of G protein signalling-like domain;
O15085	556	S	Rho guanine nucleotide exchange factor 11	ARHGEF11	2.368	2.041				1.184						....P.SP.....	TFHIPLSPVEVKP	nucl	single organism signaling; cell surface receptor signaling pathway; positive regulation of biosynthetic process; cellular component morphogenesis; regulation of cell growth; response to external stimulus; actin cytoskeleton organization; positive regulation of molecular function; response to growth factor stimulus; regulation of small GTPase mediated signal transduction; nervous system developmen…	membrane; cell part; intracellular; cytoplasm; intracellular part; cytosol; cell; cytoplasmic part;	guanyl-nucleotide exchange factor activity; receptor binding; nucleoside-triphosphatase regulator activity; ion binding; GTPase regulator activity; protein binding; enzyme regulator activity; binding; phospholipid binding; lipid binding; G-protein coupled receptor binding; anion binding; Ras guanyl-nucleotide exchange factor activity; small GTPase regulator activity; enzyme activator activity; Rh…	K12331	ARHGEF11; Rho guanine nucleotide exchange factor 11	hsa04270 Vascular smooth muscle contraction - Homo sapiens (human);	IPR016137; IPR011993; IPR015212; IPR001478; IPR000219; IPR001849;	Dbl homology (DH) domain; Pleckstrin homology-like domain; Pleckstrin homology domain; Regulator of G protein signalling superfamily; PDZ domain; Regulator of G protein signalling-like domain;
O15085	635	S	Rho guanine nucleotide exchange factor 11	ARHGEF11		1.164	1.236			1.184			1.04392	1.04392		...RS.S......	NVPRSRSDVDMDA	nucl	single organism signaling; cell surface receptor signaling pathway; positive regulation of biosynthetic process; cellular component morphogenesis; regulation of cell growth; response to external stimulus; actin cytoskeleton organization; positive regulation of molecular function; response to growth factor stimulus; regulation of small GTPase mediated signal transduction; nervous system developmen…	membrane; cell part; intracellular; cytoplasm; intracellular part; cytosol; cell; cytoplasmic part;	guanyl-nucleotide exchange factor activity; receptor binding; nucleoside-triphosphatase regulator activity; ion binding; GTPase regulator activity; protein binding; enzyme regulator activity; binding; phospholipid binding; lipid binding; G-protein coupled receptor binding; anion binding; Ras guanyl-nucleotide exchange factor activity; small GTPase regulator activity; enzyme activator activity; Rh…	K12331	ARHGEF11; Rho guanine nucleotide exchange factor 11	hsa04270 Vascular smooth muscle contraction - Homo sapiens (human);	IPR016137; IPR011993; IPR015212; IPR001478; IPR000219; IPR001849;	Dbl homology (DH) domain; Pleckstrin homology-like domain; Pleckstrin homology domain; Regulator of G protein signalling superfamily; PDZ domain; Regulator of G protein signalling-like domain;
[truncated: 10,862 more rows]

## Sheet: exp1.quant
Protein accession	Position	Amino acid	Protein description	Gene name	Localization probability	PEP	Score	Modified sequence	Charge	Mass error [ppm]	MS/MS Count	control	treat	treat/control Ratio
[truncated: 8,283 more rows]

## Sheet: exp1.peptide quant
ID	Sequence	Length	Modifications	Modified sequence	Protein accession	Protein description	Charge	m/z	Mass error [ppm]	PEP	Score	MS/MS Count	treat/control
[truncated: 46,367 more rows]

[truncated: 4 more sheets: exp2.quant, exp2.peptide quant, exp3.quant, exp3.peptide quant]
